1 **Chemical ecology of a tripartite symbiosis**

2 *Nicholas C. Mucci*<sup>1</sup>, *Katarina A. Jones*<sup>2</sup>, *Mengyi Cao*<sup>3</sup>, *Michael R. Wyatt II*<sup>4</sup>, *Shane Foye*<sup>5</sup>, *Sarah*  
3 *Kauffman*<sup>1</sup>, *Michela Taufer*<sup>4</sup>, *Yoshito Chikaraishi*<sup>6</sup>, *Shawn Steffan*<sup>5, 7</sup>, *Shawn Campagna*<sup>2, 8</sup>, *Heidi*  
4 *Goodrich-Blair*<sup>1, 3#</sup>

5

6 <sup>1</sup>Department of Microbiology, University of Tennessee-Knoxville, Knoxville TN, USA

7 <sup>2</sup>Department of Chemistry, University of Tennessee-Knoxville, Knoxville TN, USA

8 <sup>3</sup>Department of Bacteriology, University of Wisconsin-Madison, Madison WI, USA

9 <sup>4</sup>Department of Electrical Engineering and Computer Science, University of Tennessee-  
10 Knoxville, Knoxville TN, USA

11 <sup>5</sup>Department of Entomology, University of Wisconsin-Madison, Madison WI, USA

12 <sup>6</sup>Department of Biogeochemistry, Japan Agency for Marine-Earth Science and Technology,  
13 Yokosuka 237-0061, Japan

14 <sup>7</sup>US Department of Agriculture, Agricultural Research Service, Madison WI, USA

15 <sup>8</sup>Biological and Small Molecule Mass Spectrometry Core, University of Tennessee-Knoxville,  
16 Knoxville TN, USA

17

18 #Corresponding author: Heidi Goodrich-Blair, hgblair@utk.edu

19

20 **ABSTRACT**

21           Microbial symbiotic interactions, mediated in part by small molecule signaling, drive  
22 physiological processes of higher order systems, including the acquisition and consumption of  
23 nutrients that support symbiotic partner reproduction. Advances in metabolic analytic  
24 technologies provide new avenues to examine how chemical ecology, or the conversion of  
25 existing biomass to new forms, changes over a symbiotic lifecycle. Here we examine such  
26 processes using the tripartite relationship involving the nematode host *Steinernema*  
27 *carpocapsae*, its obligate mutualist bacterium, *Xenorhabdus nematophila*, and the insects they  
28 infect together. The nematode infective juveniles infect insects into which they release bacteria  
29 that help suppress insect immunity and kill the insect. The nematode-bacterium pair consume  
30 the insect cadaver and reproduce until nutrients are depleted, causing a new generation of  
31 infective juvenile nematodes, colonized by the bacterial symbiont, to leave the cadaver in  
32 search of insect prey. To begin to understand the processes by which insect biomass is  
33 converted over time to either nematode or bacterium biomass, we took a three-pronged  
34 approach integrating information from trophic, metabolomics, and gene regulation analyses.  
35 Trophic analysis established bacteria as the primary insect consumers, with nematodes at a  
36 trophic position of 4.37, indicating consumption of bacteria and likely also other nematodes.  
37 Metabolic changes associated with bioconversion of *Galleria mellonella* insects were assessed  
38 using multivariate statistical analyses of metabolomics datasets derived from sampling over an  
39 infection time course. Statistically significant, discrete phases were distinguishable from each  
40 other, indicating the insect chemical environment changes reproducibly during bioconversion.  
41 Tricarboxylic acid (TCA) cycle components and amino acids such as proline and leucine were  
42 significantly affected throughout the infection. Hierarchical clustering revealed a similar  
43 molecular abundance fluctuation pattern for nucleic acid, amino acid, and lipid biosynthesis  
44 metabolites. Together, these findings contribute to an ongoing understanding of how symbiont  
45 associations shape chemical environments.

46 **IMPORTANCE**

47           The biological world depends on microbial processes, including symbiotic exchanges  
48 among mutualists and antagonists. Technical advances have enabled investigation of microbial  
49 trophic positions within communities and the identification of metabolites exchanged between  
50 microbes and their hosts. These tools were applied to the tripartite *Xenorhabdus* bacteria-  
51 *Steinernema* nematode-*Galleria* insect symbiosis. Trophic analyses demonstrate the primary  
52 consumer of the insect are the bacteria, and in turn the nematode consumes the bacteria. This  
53 suggests the *Steinernema-Xenorhabdus* mutualism is a form of agriculture in which the  
54 nematode cultivates their bacterial food source by inoculating them into insect hosts.  
55 Metabolomics analysis revealed a shift in biological material throughout progression of the  
56 lifecycle: active infection, insect death, and conversion of cadaver tissues into bacterial biomass  
57 and nematode tissue. We show that each phase of the lifecycle is metabolically distinct, with  
58 significant differences in tricarboxylic acid cycle and amino acid metabolism. Our findings  
59 demonstrate that symbiotic lifecycles can be defined by reproducible stage-specific chemical  
60 signatures, enhancing our broad understanding of metabolic processes that underpin a three-  
61 way symbiosis.

## 62 INTRODUCTION

63 Symbiotic interactions are ubiquitous in biological systems and have shaped the  
64 evolution of life {Margulis, 1981}. These long-term, intimate associations are driven by small  
65 molecule signaling between partners. Bacterial populations establish diverse and expansive  
66 metabolite-mediated signaling networks that control gene expression and downstream  
67 behaviors, such as biofilm formation and the production of host-interacting effectors {Camilli,  
68 2006; Worthington, 2012; Chaston, 2012}. A common mechanism by which bacteria sense and  
69 transduce metabolic signals is through transcription factors whose DNA binding affinity or  
70 specificity is modulated by binding metabolite ligands. For instance, LysR-type transcription  
71 factors, which are conserved across proteobacteria, are characterized by a conserved *N*-  
72 terminal DNA-binding domain and a *C*-terminal domain that varies among LysR-type regulator  
73 homologs. The latter domain is responsible for ligand metabolite binding and dictates the  
74 response specificity of the transcription factor {Budnick, 2020; Henikoff, 1988; Maddocks, 2008}.  
75 In a range of bacteria, LysR-type regulators modulate various phenotypes, including virulence,  
76 nutrient uptake and metabolic homeostasis, motility, quorum sensing, and antibiotic resistance  
77 {Abdelhamed, 2020}. Another diverse family of transcription factors, feast/famine regulatory  
78 factors like leucine-responsive regulatory protein (Lrp), will bind and dimerize with amino acids  
79 in response to nutrient levels and globally induce transcriptional changes {Yokoyama, 2006}.

80 Given the key function of metabolites in communicating information about intracellular  
81 and extracellular environmental conditions, examining their identities and abundances is critical  
82 to understanding biological systems. Metabolomics has enabled such studies and has been  
83 used to detect specific small molecules that drive essential cellular processes and inter-kingdom  
84 signaling {Tang, 2011; Clarke, 2008; Phelan, 2014}. Further, it is being applied to more complex  
85 ecosystems comprising multi-species microbiota colonizing a host {Dong, 2019}. However, to  
86 date such studies have been primarily focused on binary conditional comparisons between

87 treatments, or on single, snapshot sampling of complex interactions. Here, to gain insights  
88 temporal changes in metabolic pathways that occur in complex ecosystems, a longitudinal  
89 analysis of metabolic profiles was conducted in closed ecosystem in which biomass is being  
90 reproducibly converted from one type of living organism to another. The closed ecosystem  
91 comprised an individual insect infected with an entomopathogenic nematode (EPN) and  
92 bacterium (EPNB) pair.

93         EPNs of the genera *Steinernema* and *Heterorhabditis* associate with mutualistic bacteria  
94 in the genera *Xenorhabdus* and *Photorhabdus*, respectively. An infective juvenile (IJ) stage of  
95 EPN carry their mutualistic bacteria in their intestine as they dwell in the soil seeking insect  
96 hosts to infect. Upon infection, the bacteria are released into the insect blood cavity and  
97 together the nematode and bacterium kill and consume the insect for their own reproduction  
98 before developing into the bacteria-colonized infective stage again to repeat the cycle  
99 {Richards, 2009; Stock, 2019}. EPNBs have been applied as insecticide alternatives to promote  
100 agricultural productivity and to help prevent transmission of insect diseases like dengue and  
101 West Nile virus {Lacey, 2012; Javal, 2019; da Silva, 2020}.

102         In this study, consumption and bioconversion of the insect *Galleria mellonella* by the  
103 EPN *Steinernema carpocapsae* and its mutualistic bacterial symbiont, *Xenorhabdus*  
104 *nematophila* was examined from a metabolic perspective. *G. mellonella* is used for laboratory  
105 isolation and propagation of EPNB, is a model host to understand virulence of a variety of  
106 microbial pathogens {Tsai, 2016; Ramarao, 2012} and has a characterized metabolome {Killiny,  
107 2018}. The *S. carpocapsae*-*X. nematophila* pair was chosen due to the wealth of information  
108 available about them from molecular, cellular, and genetic studies {Martens, 2004; Stock, 2019}.  
109 For example, it is known that *X. nematophila* bacterial effectors and natural products suppress  
110 insect immunity, kill insect blood cells, degrade insect tissues, and defend the insect cadaver  
111 from opportunistic competitors {Herbert, 2007}. Also, *X. nematophila* bacteria are essential for  
112 *S. carpocapsae* reproduction; in the absence of bacteria fewer nematode IJs emerge from

113 insect cadavers after reproduction {Mitani, 2004}. Expression of effectors and physiological  
114 adaptation to changing host environments is controlled in *X. nematophila* by transcriptional  
115 regulators that are predicted to sense and respond to prevailing metabolic conditions {Richards,  
116 2008}. For instance, the LysR-type regulator LrhA that is necessary for *X. nematophila* virulence  
117 and controls expression of an extracellular phospholipase that is necessary for insect  
118 degradation {Richards, 2008; Richards, 2009; Richards, 2010}, the sigma factor RpoS that is  
119 necessary for colonizing the IJ stage of the nematode {Vivas, 2001}, the two-component system  
120 CpxRA, and the leucine-responsive regulatory protein Lrp, both of which are necessary for  
121 normal virulence and mutualism behaviors {Herbert, 2007; Herbert-Tran, 2009a; Herbert-Tran,  
122 2009b, Cowles, 2007; Herbert, 2007}, NilR, a lambda like repressor family transcription factor  
123 that negatively regulates genes necessary for nematode colonization {Cowles, 2006} and the  
124 two-component system OmpR/EnvZ that negatively controls *X. nematophila* swarming motility  
125 behavior and exoenzyme production {Park and Forst, 2006}. Further, *X. nematophila* displays  
126 phenotypic heterogeneity with respect to behaviors important for adaptation to host  
127 environments. For instance, “primary form” [1°] *X. nematophila* can be distinguished from  
128 “secondary form” [2°] by its motility, antibiotic and natural products secretion, and hemolytic and  
129 lipolytic activities and additional phenotypic variants arise over the course of insect infection  
130 {Volgyi, 1989; Givaudan, 1995; Cambon, 2019}.

131         The goal of this study was to begin to understand the overall metabolic transformations,  
132 or bioconversion processes occurring within a closed yet complex biological ecosystem. <sup>15</sup>N  
133 isotopic enrichment analyses were performed to establish the relative trophic positions of the  
134 insect, *G. mellonella*, the nematode, *S. carpocapsae*, and the bacterium, *X. nematophila*, so that  
135 the relative roles in bioconversion of each ecosystem member could be established. Then, a  
136 metabolomics analysis using an ultra-high performance liquid chromatography high-resolution  
137 mass spectrometry (UHPLC-HRMS) metabolomics technique was conducted over a 16-day

138 time course after *S. carpocapsae*-*X. nematophila* infection of *G. mellonella*, encompassing a  
139 complete bioconversion of insect tissues to the bacterial-colonized progeny IJs that emerged  
140 from the insect.

## 141 RESULTS

### 142 Trophic analysis reveals *S. carpocapsae* nematodes directly feed on *X. nematophila* 143 bacteria *in vitro* and *in vivo*:

#### 144 *In vitro* trials

145 The trophic identities of the entomopathogenic nematode (*Steinernema carpocapsae*), its  
146 bacterial symbiont (*Xenorhabdus nematophila*), and their host insect were measured empirically  
147 based on <sup>15</sup>N isotopic enrichment of amino acids (Table 1 and File S1). To this end, it was first  
148 necessary to establish that the degree of <sup>15</sup>N-enrichment between the consumers (nematodes,  
149 bacteria) and their respective diets (e.g., agar growth media, bacteria, or the insect) was  
150 consistent with past studies of inter-trophic enrichment (Chikaraishi, 2009; Chikaraishi, 2011;  
151 Steffan 2013; Steffan, 2015). This past work relied upon compound-specific isotopic analyses of  
152 select amino acid pools, particularly the degree of <sup>15</sup>N-enrichment between two amino acids—  
153 glutamic acid (glu) and phenylalanine (phe). The differential enrichment between these two  
154 amino acids provides a measure of inter-trophic enrichment, which is largely attributable to an  
155 organism's assimilation of dietary amino acids (Chikaraishi, 2007; Chikaraishi, 2009; Takizawa,  
156 2020). Such inter-trophic enrichment has been referred to as the trophic discrimination factor  
157 ( $TDF_{glu-phe}$ ), and in carefully controlled feeding studies among diverse consumer groups in the  
158 Animalia, Fungi, and Bacteria, the  $TDF_{glu-phe}$  has averaged approximately 7.2‰ (Steffan, 2015;  
159 Steffan, 2017). Here, following controlled-feeding *in vitro* trials, the nematodes and bacteria  
160 were shown to have both registered  $TDF_{glu-phe}$  values in line with past findings (Fig. 2A).  
161 Specifically, the mean ( $\pm$  SE)  $TDF_{glu-phe}$  value exhibited by nematodes cultured on bacterial  
162 lawns was  $7.41 \pm 0.22\text{‰}$  ( $N = 14$ ). When parsed by nematode stage, the  $TDF_{glu-phe}$  values of  
163 adult and infective juvenile nematodes were, respectively,  $6.96 \pm 0.16\text{‰}$  ( $N = 8$ ) and  $8.02 \pm$

164 0.36‰ ( $N = 6$ ). Nematodes fed exclusively a diet of homogenized insect biomass produced a  
165 TDF of  $7.38 \pm 0.05$ ‰ ( $N = 3$ ). Collectively, the nematode TDF was  $7.40 \pm 0.18$ ‰ ( $N = 17$ ). The  
166 bacterial symbiont, *Xenorhabdus*, which had been cultured on agar growth media, registered a  
167  $TDF_{\text{glu-phe}}$  of  $6.53 \pm 0.20$ ‰ ( $N = 6$ ). The mean  $TDF_{\text{glu-phe}}$  across both the nematodes and bacteria  
168 in this food-chain was  $7.18 \pm 0.16$ ‰, which did not represent a significant departure from the  
169 generalized 7.2‰  $TDF_{\text{glu-phe}}$  benchmark ( $t_{22} = -0.14$ ,  $P = 0.893$ ). Given the degree of inter-trophic  
170 enrichment exhibited in the nematodes and bacteria, these consumer groups were consistent  
171 with the enrichment patterns of heterotrophs across terrestrial, marine, and freshwater systems,  
172 allowing for trophic position estimation using established isotopic protocols (Chikaraishi, 2007;  
173 Chikaraishi, 2009; Chikaraishi, 2011; Steffan, 2013; Steffan, 2015; Steffan, 2017; Takizawa,  
174 2020).

175         Using compound-specific isotopic analysis of amino acids, the trophic identities of  
176 consumers and their respective diets within the *in vitro* food-chain were measured. At the base  
177 of the food-chain, the agar growth media registered a trophic position ( $TP_{\text{glu-phe}}$ ) of  $1.0 \pm 0.04$ ‰  
178 ( $N = 3$ ), and the bacteria feeding upon the agar registered at  $1.9 \pm 0.03$ ‰ ( $N = 6$ ), which  
179 represented approximately one trophic level higher than their diet. Correspondingly, the adult  
180 and infective juvenile nematodes that had fed upon the bacteria registered, respectively, at  $2.90$   
181  $\pm 0.02$ ‰ ( $N = 8$ ) and  $3.0 \pm 0.06$ ‰ ( $N = 6$ ), which, as predicted, was exactly one trophic level  
182 higher than their diet. The homogenate of insect biomass was measured at  $2.2 \pm 0.02$ ‰ ( $N = 6$ ),  
183 and the nematodes feeding exclusively on this homogenate registered at  $3.2 \pm 0.01$ ‰ ( $N = 4$ ),  
184 which again demonstrated that when the nematodes consumed a given diet, they registered  
185 one trophic level higher. The *in vitro* food-chain effectively compartmentalized each consumer  
186 group and thereby provided a means to confirm that when the nematodes or bacteria consumed  
187 a given diet, their isotopic compositions enriched consistently and produced predictable trophic  
188 position estimates.



189

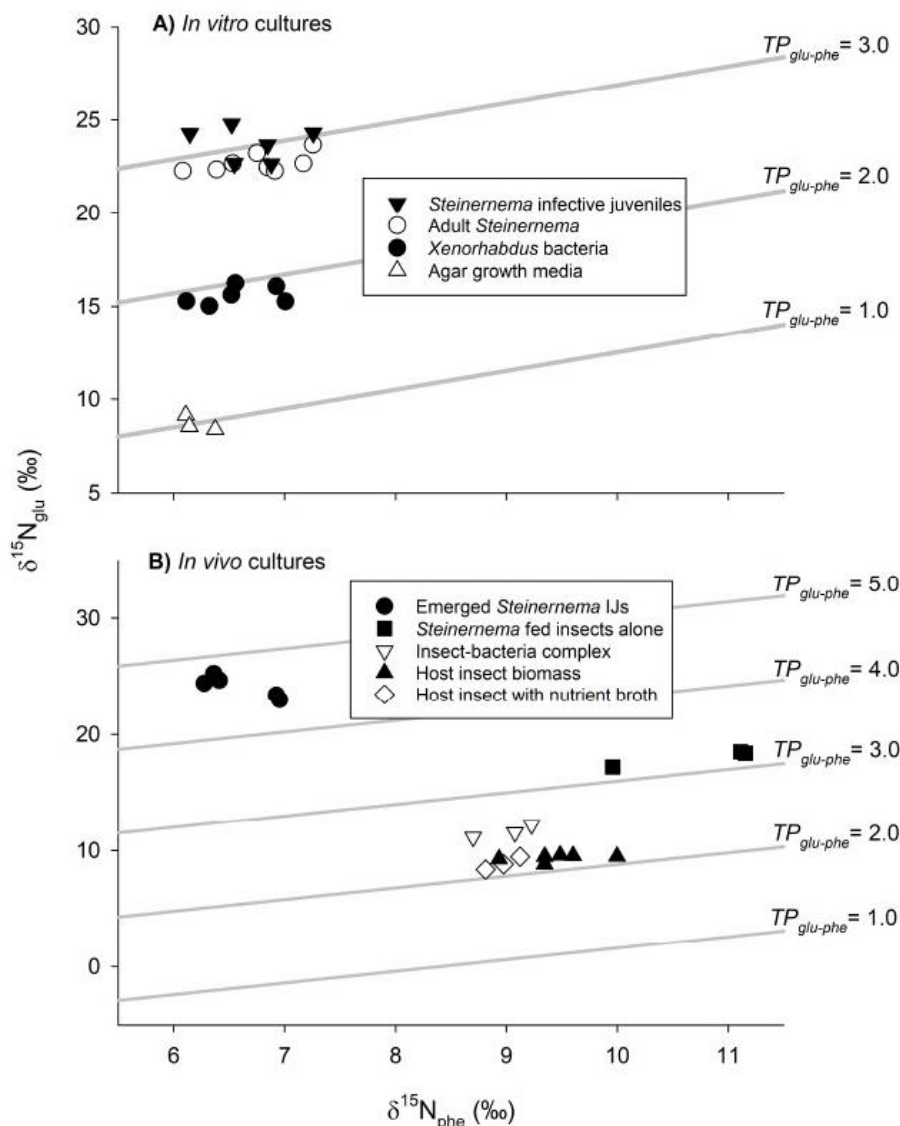

**Figure 2: Trophic analyses reveal *Steinernema* nematodes feed on *Xenorhabdus* bacteria A) *In vitro* and B) *In vivo*.** Trophic isoclines are represented via numeric  $TP_{\text{glu-phe}}$  % ratios. Specific bacterial cultures or animals are displayed as the different shapes shown in the figure legends.

190

### 191 *In vivo* trials

192 These findings allowed for the subsequent *in vivo* trials involving insect cadavers (Fig. 2B, Table

193 1 and File S1). As reported above, the mean  $TP_{\text{glu-phe}}$  of an uncolonized insect cadaver was  $2.2$

194  $\pm 0.02$  ( $N = 6$ ). When the insect was colonized by bacteria alone, the  $TP_{\text{glu-phe}}$  of the insect-

195 bacteria complex was  $2.5 \pm 0.03$  ( $N = 3$ ). This complex represented the blending of consumer  
 196 and diet (as described in Steffan, 2017), wherein the consumer (i.e., the *Xenorhabdus* bacterial  
 197 population) was suffused within and throughout its diet (the insect cadaver). Given that both the  
 198 bacterial and insect biomass were available within the cadaver, this established the basis for the  
 199 question as to what a developing nematode would consume/assimilate within the cadaver. The  
 200 diet of the nematodes (i.e., the insect-bacterial complex) was measured at  $\sim 2.5$ , thus if the  
 201 nematodes within the cadaver fed randomly on all available substrates, the nematode  $TP_{\text{glu-phe}}$   
 202 would be expected to be  $\sim 3.5$  (i.e.,  $\sim 2.5 + 1.0$ ). However, the infective juveniles emerging from  
 203 the cadavers registered a  $TP_{\text{glu-phe}}$  of  $4.6 \pm 0.08$  ( $N = 5$ ), a full trophic level higher than expected.

204 **Table 1. Summary of *in vitro* and *in vivo* trophic measurements.**

| Consumer <sup>a</sup>                                                   | Diet type <sup>b</sup>                             | TDF <sub>glu-phe</sub> <sup>c</sup> | TP <sub>expected</sub> <sup>c</sup> | TP <sub>glu-phe</sub> <sup>c</sup> |
|-------------------------------------------------------------------------|----------------------------------------------------|-------------------------------------|-------------------------------------|------------------------------------|
| <i>in vitro</i> growth conditions                                       |                                                    |                                     |                                     |                                    |
| None                                                                    | Yeast-soy lipid agar (YE-YS)                       | NA                                  | 1.0                                 | 1.0                                |
| <i>Xenorhabdus</i>                                                      | Yeast-soy broth (YE-YS)                            | 6.53                                | 2.0                                 | 1.9                                |
| <i>Steinernema</i> (adults)                                             | <i>Xenorhabdus</i> on yeast-soy lipid agar (YE-YS) | 6.96                                | 3.0                                 | 2.9                                |
| <i>Steinernema</i> (IJs)                                                | <i>Xenorhabdus</i> on yeast-soy lipid agar (YE-YS) | 8.02                                | 3.0                                 | 3.0                                |
| <i>in vivo</i> growth conditions                                        |                                                    |                                     |                                     |                                    |
| None                                                                    | <i>Galleria</i> (base of food-chain)               | NA                                  | 2.0                                 | 2.2                                |
| None                                                                    | <i>Galleria</i> + PBS buffer (positive control)    | NA                                  | 2.0                                 | 2.2                                |
| None                                                                    | Yeast-soy broth (YE-YS)                            | NA                                  | 2.0                                 | 2.2                                |
| <i>Xenorhabdus</i> (measured as<br><i>Galleria-Xenorhabdus</i> complex) | <i>Galleria</i>                                    | NA                                  | 2.5                                 | 2.5                                |
| <i>Steinernema</i> IJs                                                  | <i>Galleria-Xenorhabdus</i> complex                | NA                                  | 3.5                                 | 4.6                                |

205 <sup>a</sup>Each organism in the ecosystem was assessed for its trophic position as a consumer under controlled *in vitro* conditions  
 206 or *in vivo* within an insect cadaver. None indicates that the condition tested was diet only, no consumer.

207  
 208 The data above demonstrated that adult *Steinernema* nematodes consume their  
 209 mutualistic bacteria. During this stage, *Xenorhabdus* bacteria colonize the anterior intestinal  
 210 caecum. To determine if this colonization influences the ability of *Steinernema* nematodes to  
 211 consume *Xenorhabdus*, the  $TP_{\text{glu-phe}}$  of adult *Steinernema* cultivated on lawns of either wild type  
 212 *Xenorhabdus*, or a non-colonizing mutant ( $\Delta SR1$ ) was assessed {Cowles, 2008}. Nematodes  
 213 had the same  $TP_{\text{glu-phe}}$  regardless of the colonization proficiency of the bacterial diet, indicating  
 214 that colonization is not required for nematode direct feeding on its symbiotic bacteria (File S1).

215

216 ***X. nematophila* transcriptional control of metabolic pathways**

217 The trophic analyses described above establish *X. nematophila* bacteria as the linchpin  
218 organism in the closed ecosystem, responsible for direct consumption of the insect tissue and  
219 serving as a primary food source for its mutualistic host *S. carpocapsae*. To gain insights into  
220 the metabolic pathways utilized by *X. nematophila* in performance of these functions, the global  
221 regulons of several transcription factors was determined using an exploratory microarray  
222 analysis, portions of which have been reported elsewhere (Fig. 2 and Table S1, and File S2)  
223 {Lu, 2011; Lu, 2012; Chaston, 2011; Hussa, 2015}. Microarray analyses were conducted on  
224 mutants lacking genes encoding the transcription factors LrhA, RpoS, NilR, and Lrp, each of  
225 which has a defect in one or more aspects of the *X. nematophila* life cycle {Vivas, 2001; Cowles,  
226 2006; Cowles, 2007; Richards, 2008}. In addition, since the primary to secondary form  
227 phenotypic variation globally influences host-interaction phenotypes, the transcriptional profiles  
228 of these variants were examined from a metabolic perspective. The mutant and secondary form  
229 cells were each compared to their wild type parent or primary form, respectively, using a  $2<|$ fold  
230 change| significance cutoff for differences in transcript levels.

231 The number of differential transcripts are a fraction of the 3733 averaged total expressed  
232 chromosome ORFs among the strains. The number of genes with differential transcript  
233 abundance in mutant/secondary form compared to wild-type/primary was highest in  $\Delta$ lrhA at  
234 396 genes (10.6%), followed by  $\Delta$ lrp, secondary form,  $\Delta$ rpoS, and  $\Delta$ nilR with 273 (7.3%), 159  
235 (4.3%), 157 (4.2%), and 83 (2.2%) differentially abundant transcripts, respectively (Fig. 2A). The  
236 proportion of genes categorized as being involved in metabolic activity varied amongst the  
237 strains. Through KEGG annotation, the highest proportion of differentially-expressed genes  
238 categorized as metabolic was observed in the  $\Delta$ rpoS strain, at 38.9%, with  $\Delta$ lrhA,  $\Delta$ lrp,  
239 secondary form, and  $\Delta$ nilR having metabolic-related activities at 18.9%, 13.6%, 10.7%, and  
240 9.8%, of the differentially expressed genes in the respective strain. Differential transcript overlap  
241 was observed while comparing the 5 strains (Supplemental figure 1). The largest overlap

242 between 2 strains was for the secondary form and  $\Delta lrp$  mutant, consisting of mostly amino acid  
243 (*xncB*, the aminotransferase XNC1\_2154) and lipid biosynthesis (*fabG*, *xncL*) genes. *X.*  
244 *nematophila* lacking *lrp* are phenotypically secondary form {Cowles, 2007}. Another large  
245 overlap was observed between  $\Delta lrp$  and  $\Delta nilR$ , which synergistically repress nematode  
246 colonization {Cowles, 2006}. The overlap regulation includes the phosphotransferase  
247 system/ascorbate metabolic (XNC1\_2826-2828) genes and prokaryotic defense system genes  
248 (XNC1\_3717-3719, 3724, and 3931).

249 Functional analysis of the differentially expressed metabolic transcripts was performed  
250 through KEGG annotation using BlastKOALA (KEGG Orthology and Links Annotation).  
251 Sequences were aligned against a nonredundant set of prokaryotic KEGG genes using BLAST  
252 searches (Kanehisa, 2016). Consistent with the KEGG annotation analysis noted above, of the  
253 strains tested  $\Delta rpoS$ ,  $\Delta rhA$ ,  $\Delta lrp$  were the most strongly impacted with respect to metabolic  
254 pathway transcripts. These three strains displayed differences in carbohydrate and amino acid  
255 metabolic regulation (Fig. 2A). Branches of carbohydrate metabolism, like propanoate, pentose  
256 and glucuronate, and glyoxylate metabolism were impacted by the  $\Delta rhA$  and  $\Delta rpoS$  mutations  
257 (Fig. 2B). Inositol phosphate metabolism was impacted in  $\Delta rpoS$  and  $\Delta lrp$  strains, while  
258 pyruvate metabolism was impacted in the  $\Delta rhA$  strain. Butanoate metabolism, a branch of  
259 carbohydrate metabolism where the amino acid ornithine is converted into short-chain fatty  
260 acids, was commonly interrupted for all mutant strains except  $\Delta nilR$ . Amino acid biosynthetic  
261 pathway transcripts were differently regulated between these three strains, with tyrosine, and  
262 the alanine, aspartate, and glutamate biosynthetic pathways similarly disrupted. Histidine and  
263 valine metabolism was uniquely altered by the  $\Delta rpoS$  mutation, glycine, serine, and threonine  
264 metabolism was uniquely altered by the  $\Delta rhA$  mutation, and phenylalanine metabolism was  
265 uniquely altered by the  $\Delta lrp$  mutation. To investigate the impacts these pathways and others

266 have on the *Xenorhabdus-Steinernema* lifecycle, a time course metabolomics experiment was  
267 designed to measure the relative quantities of metabolites within them.

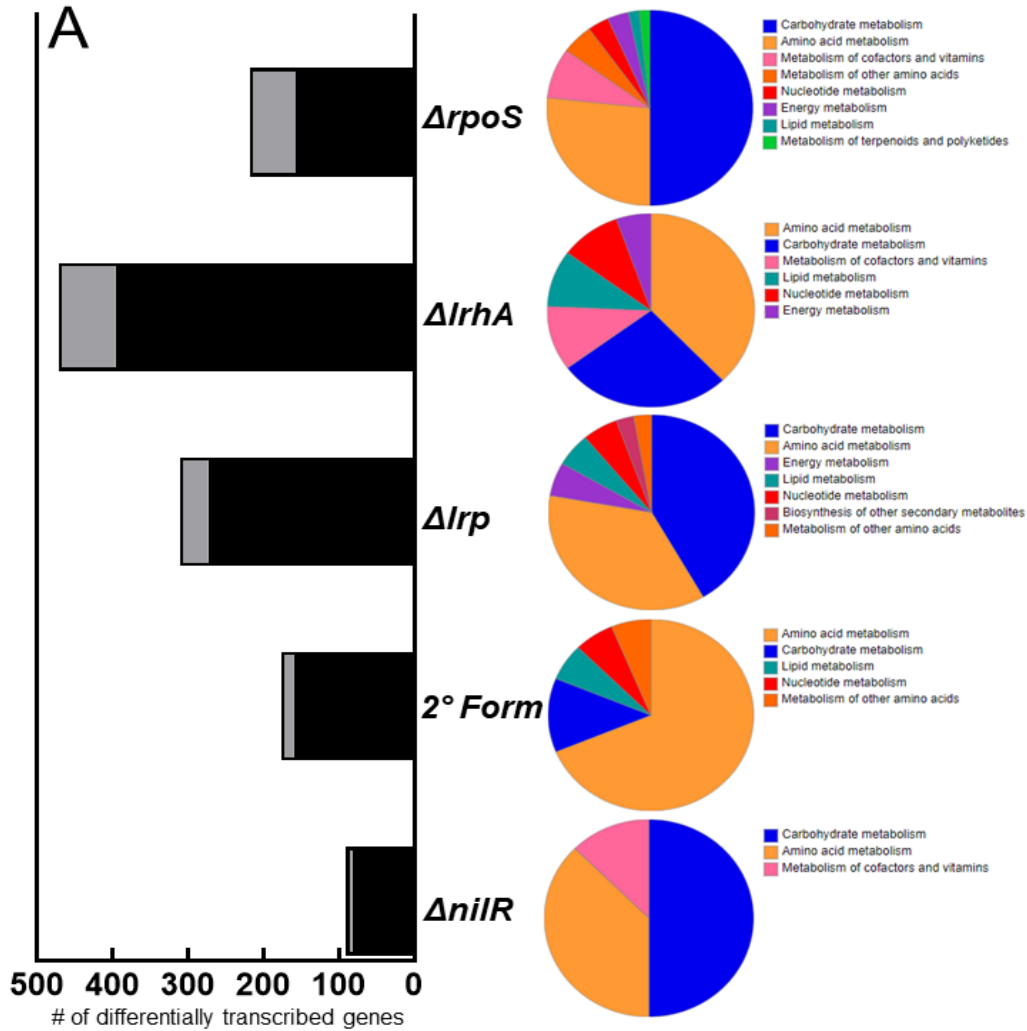

**B Amino acid metabolism**

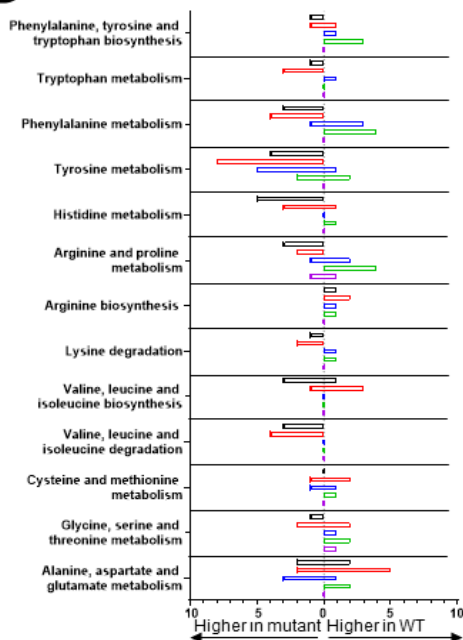

**Carbohydrate metabolism**

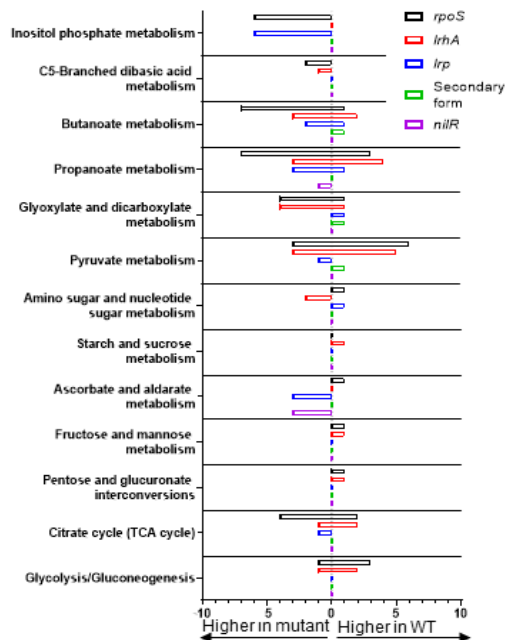

**Figure 2: Differentially expressed transcripts between *X. nematophila* mutants and their broad functional categorization.** A) Quantification of the number of differentially regulated transcripts and how many are considered metabolic (light grey), as determined by KEGG annotation. |Signal fold change| > 2 was used as a cutoff for significance. BlastKOALA functional categorization of the differential metabolic transcripts are adjacent. The color legend is organized by having the most common category listed first. B) Breakdown of the specific amino acid and carbohydrate metabolism pathways that were affected by the mutations, compared among each strain, with # of genes listed. Positive genes represent transcripts higher in the mutant relative to WT, negative genes represent transcripts lower in the mutant relative to WT.

## 270 **The metabolomic profile of EPNB-infected *G. mellonella*: an overview**

271 Having established that *X. nematophila* bacteria consume infected insect tissue, and in  
272 turn the bacteria are consumed by reproducing and developing nematodes, the temporal  
273 dynamics of metabolic profiles associated with these processes were examined. *G. mellonella*  
274 were infected with *S. carpocapsae* infective juveniles colonized by *X. nematophila* bacteria.  
275 Weights of the whole insect samples were relatively similar (Table S2). Insects were sampled  
276 over a 16-day time-course. As expected, insects began to die by Hour 24 after infection, and  
277 both living and dead insects were sampled at that time point. *X. nematophila* will have  
278 reproduced rapidly in order to suppress the insect immune response and release toxins to kill  
279 the insect host. By the second day post-infection all insects had succumbed to infection and  
280 were dead. Consistent with the initial degradation of the insect cadaver by bacteria predicted by  
281 the trophic analysis conducted above, the nematodes began to reproduce by Day 4, 3 days  
282 after the insects had died from infection (Fig. 3). At Day 7 post-infection, insect cadavers were  
283 placed in a collection trap to encourage the emergence of progeny *S. carpocapsae* IJs. Adults  
284 and IJs were observed at this stage. This is when the 2<sup>nd</sup> generation of nematodes begin to  
285 emerge, and endotokia matricida is occurring when some of these juveniles will consume their  
286 parents for nutrients. By Day 16 the insect cadavers were largely consumed, and most

287 remaining IJs will have exited. On Day 16 the *S. carpocapsae* IJs, colonized by *X. nematophila*  
288 symbionts, were collected from the water trap and analyzed with the other samples. The  
289 proportions of nematodes observed at these stages are consistent with previous observations,  
290 in which there are more adults and juveniles during the middle phase compared to IJs which  
291 changes to high numbers of IJs into the late phase {Cao, 2020}. The above observations led us  
292 to design a time course metabolomics experiment in which samples were divided into 3 major  
293 time frames: the early infection, characterized by bacterial replication and the killing of the insect  
294 host, middle infection, characterized by nematode reproduction and nutrient conversion of the  
295 cadaver, and late infection, characterized by nutrient depletion and IJ emergence.



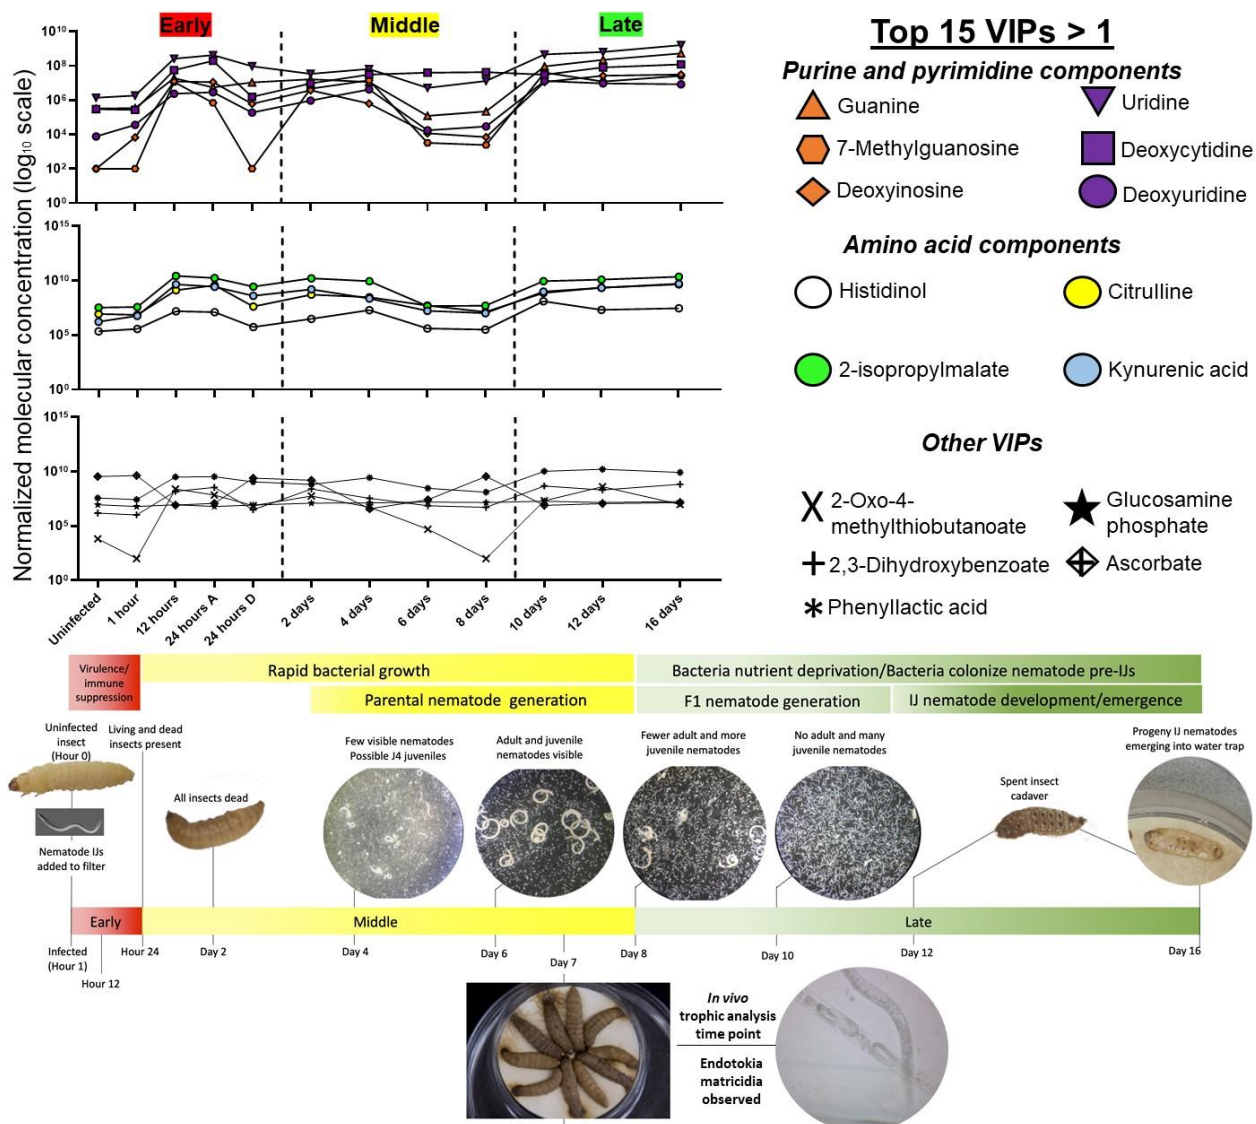

296

297 **Figure 3: Key moments in the EPNB lifecycle mapped onto important molecules are**  
 298 **indicative of the bioconversion of the insect cadaver.** The top 15 VIPs>1 metabolites  
 299 averaged relative abundances were grouped together into 3 categories: purine and pyrimidine  
 300 components, amino acid components, and other important molecules. Relative metabolite  
 301 abundance in log scale is displayed on the y-axis of the line graphs.

302

303           Metabolites were extracted from individual insects sampled over the infection time  
304 course and analyzed using an untargeted UHPLC-HRMS method. The untargeted metabolic  
305 profiling analysis revealed 13,748 spectral features. Through the mass spectrometric  
306 measurements, a total of 170 of these features were identified based on comparison to known  
307 exact mass-to-charge ( $m/z$ ) ratio and retention times from a database of central energy  
308 metabolites (File S3). Another 3,138 unidentified spectral features were included in the analysis  
309 and putatively annotated based on their exact masses compared to a *Xenorhabdus* secondary  
310 metabolite database (File S4). This database serves as a rich repository to explore secondary  
311 metabolite temporal flux in the tripartite ecosystem of insect, bacteria, and nematode.

### 312 **Multivariate data analysis shows metabolic profile gradient corresponding to infection** 313 **progression**

314           Partial least squares-discriminant analysis (PLS-DA) was performed to observe gross  
315 chemical environment changes over time of insect bioconversion to nematode-bacterium  
316 complex, when combining all detected metabolite data. A three-dimensional PLS-DA plot shows  
317 a progression of distinct metabolic profiles from uninfected insects (black circles) to insects in  
318 which bacteria and nematodes are reproducing (red and yellow gradients), and finally to fully  
319 consumed insects (green gradients) from which bacterial-colonized infective juvenile  
320 populations are emerging (Fig. 4A). Component 1 is 41.1% and contributes the most  
321 significantly to the separation observed in the PLS-DA plot.

322           To examine which metabolites are responsible for most of the variation represented by  
323 the PLS plots, Variable Importance in Projection (VIP) values for component 1 were calculated.  
324 VIP is a weighted sum of squares of the PLS loadings that considers the amount of explained Y-  
325 variation in each dimension. A VIP score >1 indicates that the metabolite significantly  
326 contributed to time point differentiation. Most of the VIP>1 metabolites exhibited a bimodal  
327 pattern, going from very low in the uninfected insect, to rising in the early bacterial replication

328 phase, to dropping during the middle nematode reproduction phase, and finally rising very high  
329 in the late nutrient deplete phase (Fig. 4B and File S5). Overall, these metabolites were involved  
330 in nucleotide and nucleoside biosynthesis, NAD<sup>+</sup> biosynthesis, and iron acquisition. These  
331 included the purine and pyrimidine metabolites 7-methylguanosine, guanine, deoxyinosine,  
332 uridine, deoxyuridine, and deoxycytidine. Other top metabolites include kynurenic acid and  
333 anthranilate which are precursors to NAD<sup>+</sup> synthesis. Of the top 15 VIPs, ascorbate was the  
334 only molecule to exhibit a decreased abundance over time, dropping from very high abundance  
335 to very low later in the time course. This vitamin is necessary for neuron development and could  
336 be salvaged from the cadaver to build the nematode nervous systems {May, 2012}.

337 Kynurenic acid is an intermediate in the kynurenine pathway and is a way for organisms  
338 to synthesize NAD<sup>+</sup> if they cannot *de novo* synthesize the compound through encoding a  
339 quinolinate phosphoribosyltransferase (QPRTase) {Katsyuba, 2018}. *S. carpocapsae*, like *C.*  
340 *elegans*, lacks a standard QPRTase but encodes the uridine monophosphate  
341 phosphoribosyltransferase (*umps-1*) which synthesizes NAD<sup>+</sup> from the kynurenine pathway  
342 {Rougon-Cardoso, 2016; Lee, 2020}. Significant flux of this metabolite throughout the lifecycle  
343 could be a metabolic signature nematode NAD<sup>+</sup> production.

344 Phenylacetic acid is a uremic toxin that builds up in kidney patients and is the product of  
345 bacterial metabolisms. In *P. aeruginosa* phenylacetic acid (PAA) accumulates at high cell  
346 density and inhibits the Type III Secretion System (T3SS), which is toxic to host cells {Wang,  
347 2013}. *X. nematophila* does not have a T3SS but does have the evolutionarily related flagellar  
348 export apparatus. The transcription factor Lrp positively regulates the flagellar regulon, as well  
349 as the gene encoding the XlpA lipase, an enzyme associated with the ability of *X. nematophila*  
350 to support *S. carpocapsae* reproduction {Richards, 2008; Richards, 2010}. Although not  
351 detected by microarray analysis, quantitative reverse transcriptase analyses indicate that the  
352 transcription factor LrhA also positively regulates *xlpA* expression {Richards, 2008}. The

353 relatively higher intensity of phenylacetic acid at later stages of insect bioconversion may signal  
354 inhibition of secretion of bioconversion enzymes.

355           2,3-dihydroxybenzoate is a compound involved in siderophore biosynthesis non-  
356 ribosomal peptide biosynthesis of siderophore, highlighting a potential importance in iron  
357 acquisition from the cadaver. Iron itself does not appear to be limited in the cadaver but it needs  
358 to be harvested by the bacteria to aid in nematode reproduction {Ciche, 2003}. *X. nematophila*  
359 does not encode *entA* or *entB*, genes that participate in the conversion of 2,3-  
360 dihydroxybenzoate to the enterobactin siderophore pathway {Latham, 2014}. Siderophore  
361 production is necessary for antibiosis in the closely related *Photorhabdus-Heterorhabditis* EPNB  
362 symbiosis, which has characterized *phb* genes that are homologous to the *ent* genes {Ciche,  
363 2003}. The *Photorhabdus phb* genes encode proteins that sequester iron from the cadaver to  
364 fend off soil-dwelling bacterial colonizers that exploit the cadaver, and *X. nematophila* does not  
365 have any homologs to these genes. *X. nematophila* does not completely dominate the bacterial  
366 community of the insect host, suggesting that other taxa such as *Alcaligenes* are possibly  
367 responsible for this concentration shift {Cambon, 2020}.

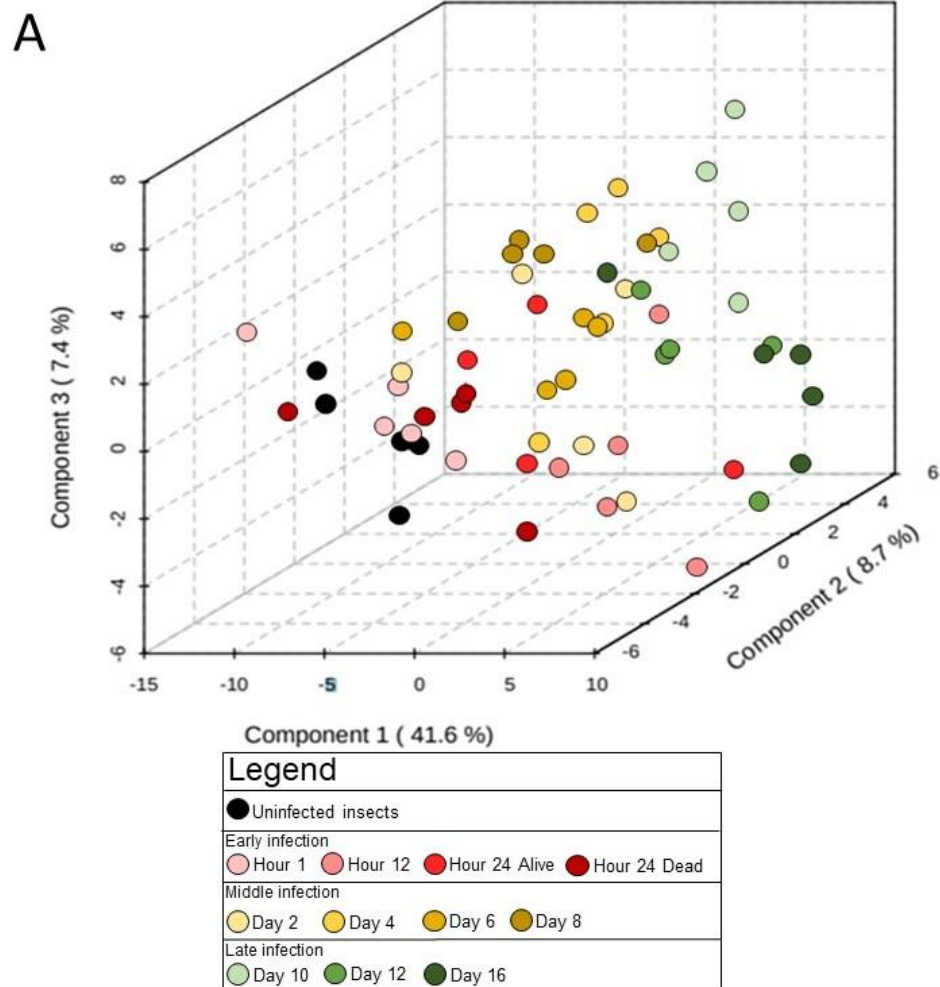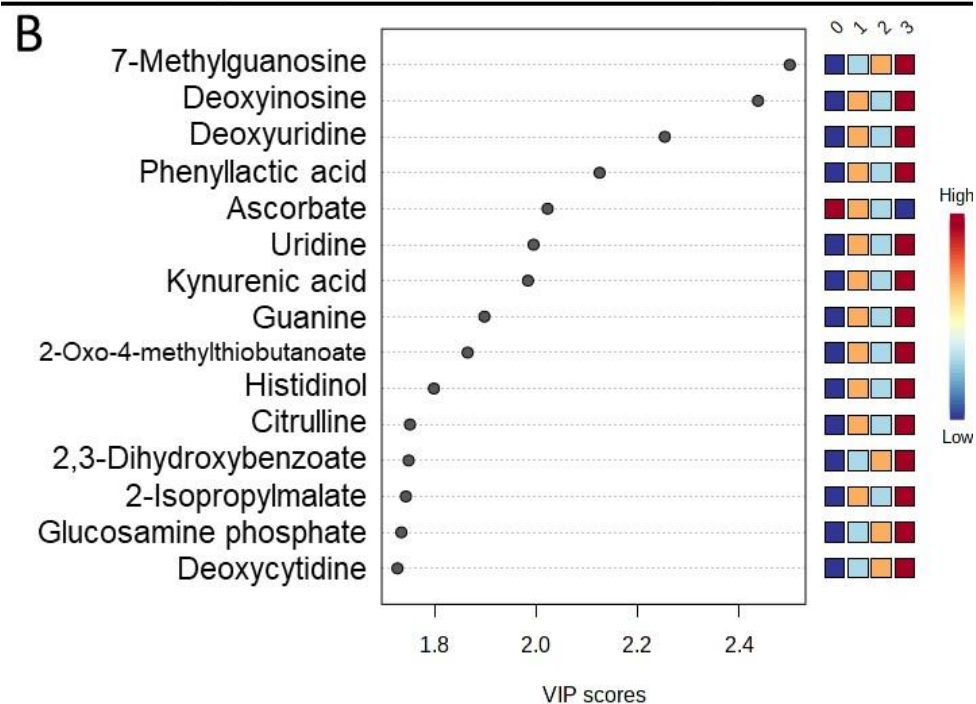

369 **Figure 4: Distinct chemical environments occur during bioconversion of an insect**  
370 **cadaver by *S. carpocapsae* and *X. nematophila*.** A) Three-dimensional partial least squares-  
371 discriminant analysis (PLS-DA) of time course infection metabolic profiles grouped according to  
372 stage of infection: uninfected (black) and early (red gradient), middle (yellow gradient), and late  
373 infected insects (green gradient). Components contributing to the separation of the profiles are  
374 listed (in %) on the axes. B) The top 15 VIPs contributing to component 1 are listed, where the  
375 relative abundance shifts over the time course shown in a heatmap on the right. The numbers  
376 on top of the heatmap show the time phases: 0 (uninfected), 1 (early), 2 (middle), and 3 (late).

377 To identify patterns and groups of metabolite abundance changes over time, hierarchical  
378 clustering was performed to reveal groups of metabolites that exhibit similar concentration  
379 changes over the time course of bioconversion. A dendrogram of all 170 identified metabolites  
380 was generated using the absolute value of the spearman correlation between molecular  
381 concentrations, where distance between molecules is defined as  $1-|rs|$  with  $rs$  as the spearman  
382 rank correlation between time course data points of said molecules (Fig. 5A). Metabolite  
383 concentration averages were taken for the four time-phases defined: uninfected, early, middle,  
384 and late infection. Metabolite clusters were visualized in a heatmap that displays their pairwise  
385 correlation between each molecule (Supplemental Figure 2). A heatmap that shows the  
386 metabolite clusters, separated by black bars, with the molecule trends in concentration change  
387 over time was generated (Fig. 5B). There were 10 total metabolite clusters identified, each with  
388 a clear molecular concentration pattern in which the metabolites in that cluster exhibited similar  
389 rates of change together over the time phases.

390 Clusters of metabolites that exhibit similar rates of change for each time phase were  
391 examined to gain an understanding of very broad metabolic pathways affected at each time  
392 phase (File S3). In the early infection phase relative to the previous uninfected phase, there are  
393 increased abundances of Clusters 4 and 5. These clusters contain metabolites involved in



394 glutathione biosynthesis (glutamate, cysteine, pyroglutamic acid, and NADP<sup>+</sup>). Glutathione  
395 intermediates are increasing while glutathione itself (Cluster 3) is decreasing. Decreased  
396 abundance of glutathione paired with increased abundance of synthesis intermediates could be  
397 indicative of how the insect is fighting off this pathogen; the insect immune response attempts to  
398 strike an equilibrium between non-specific reactive molecules released through the  
399 phenoloxidase melanization cascade and the antioxidant glutathione which protects against the  
400 reactive molecules {Clark, 2010; Stahlschmidt, 2015}. Also increasing during this phase are  
401 several amino acids, namely those involved in tryptophan metabolism (tryptophan itself and  
402 indole). Metabolites that exhibited continuously decreasing abundances in the early phase  
403 relative to the uninfected phase were mapped onto Clusters 1, 3, 8, 9, and 10. These clusters  
404 contain many compounds, and the highest proportions are involved in purine and pyrimidine  
405 biosynthesis and ascorbate metabolism (myo-Inositol, UDP-glucose, UDP-glucuronate, and  
406 glucarate). From the microarray data, generally the regulator mutants caused transcripts in  
407 ascorbate (*nilR*, *lrp*) and tryptophan (*lrhA*, *rpoS*) to decrease. These data from the early phase  
408 represent the clusters of metabolites that could be targeted by the bacteria to induce insect  
409 death and the metabolites used by the insect to fight the losing war.

410         From the early phase into the middle infection phase, few clusters exhibit an increase in  
411 rates of change. These metabolites are in Clusters 8 and 10, which contain several purine  
412 components (deoxyinosine, xanthosine, and inosine) as well as one of the only B vitamins  
413 detected in this screen, riboflavin (vitamin B<sub>2</sub>). Other detected B vitamins, like biotin (vitamin B<sub>7</sub>),  
414 pantothenate (vitamin B<sub>5</sub>), and 4-pyridoxate (catabolic product of vitamin B<sub>6</sub>), are decreasing in  
415 abundance during the middle phase. Many other compounds decreased in abundance during  
416 the middle infection phase, relative to the previous early infection phase. These include amino  
417 acids (arginine, phenylalanine, tyrosine, tryptophan, cysteine, and methionine), which could  
418 reflect that these are the amino acids being incorporated into protein creation for bacterial and

419 nematode biomass accumulation. Microarray analysis indicates widespread differential  
420 regulation in these amino acid categories, particularly in the secondary form, *lrp*, and *lrhA*  
421 mutants. Other decreasing compounds include pyrimidine intermediates (UMP, CMP, CDP, and  
422 UDP) and ascorbate and sugar acid compounds. These data from the middle phase are  
423 reflective of the compounds that are being syphoned from the cadaver and incorporated into the  
424 nematode lifecycle.

425         As the insect cadavers entered the late infection phase, nucleic acids (guanine, thymine,  
426 and uracil) and amino acids (arginine, cysteine and methionine, and aspartate) steeply  
427 increased. This suggests these accumulating compounds are available for nematode DNA,  
428 RNA, and protein incorporation, but other factors such as overcrowding in the cadaver or lack of  
429 other necessary resources force the nematode to exit. Decreasing rate of change of metabolites  
430 relative to the previous middle phase included compounds involved with leucine metabolism and  
431 the TCA cycle. These could be more rate-limiting compounds, where their decreasing  
432 abundance could signal to the expanding nematode population that it is time to exit.



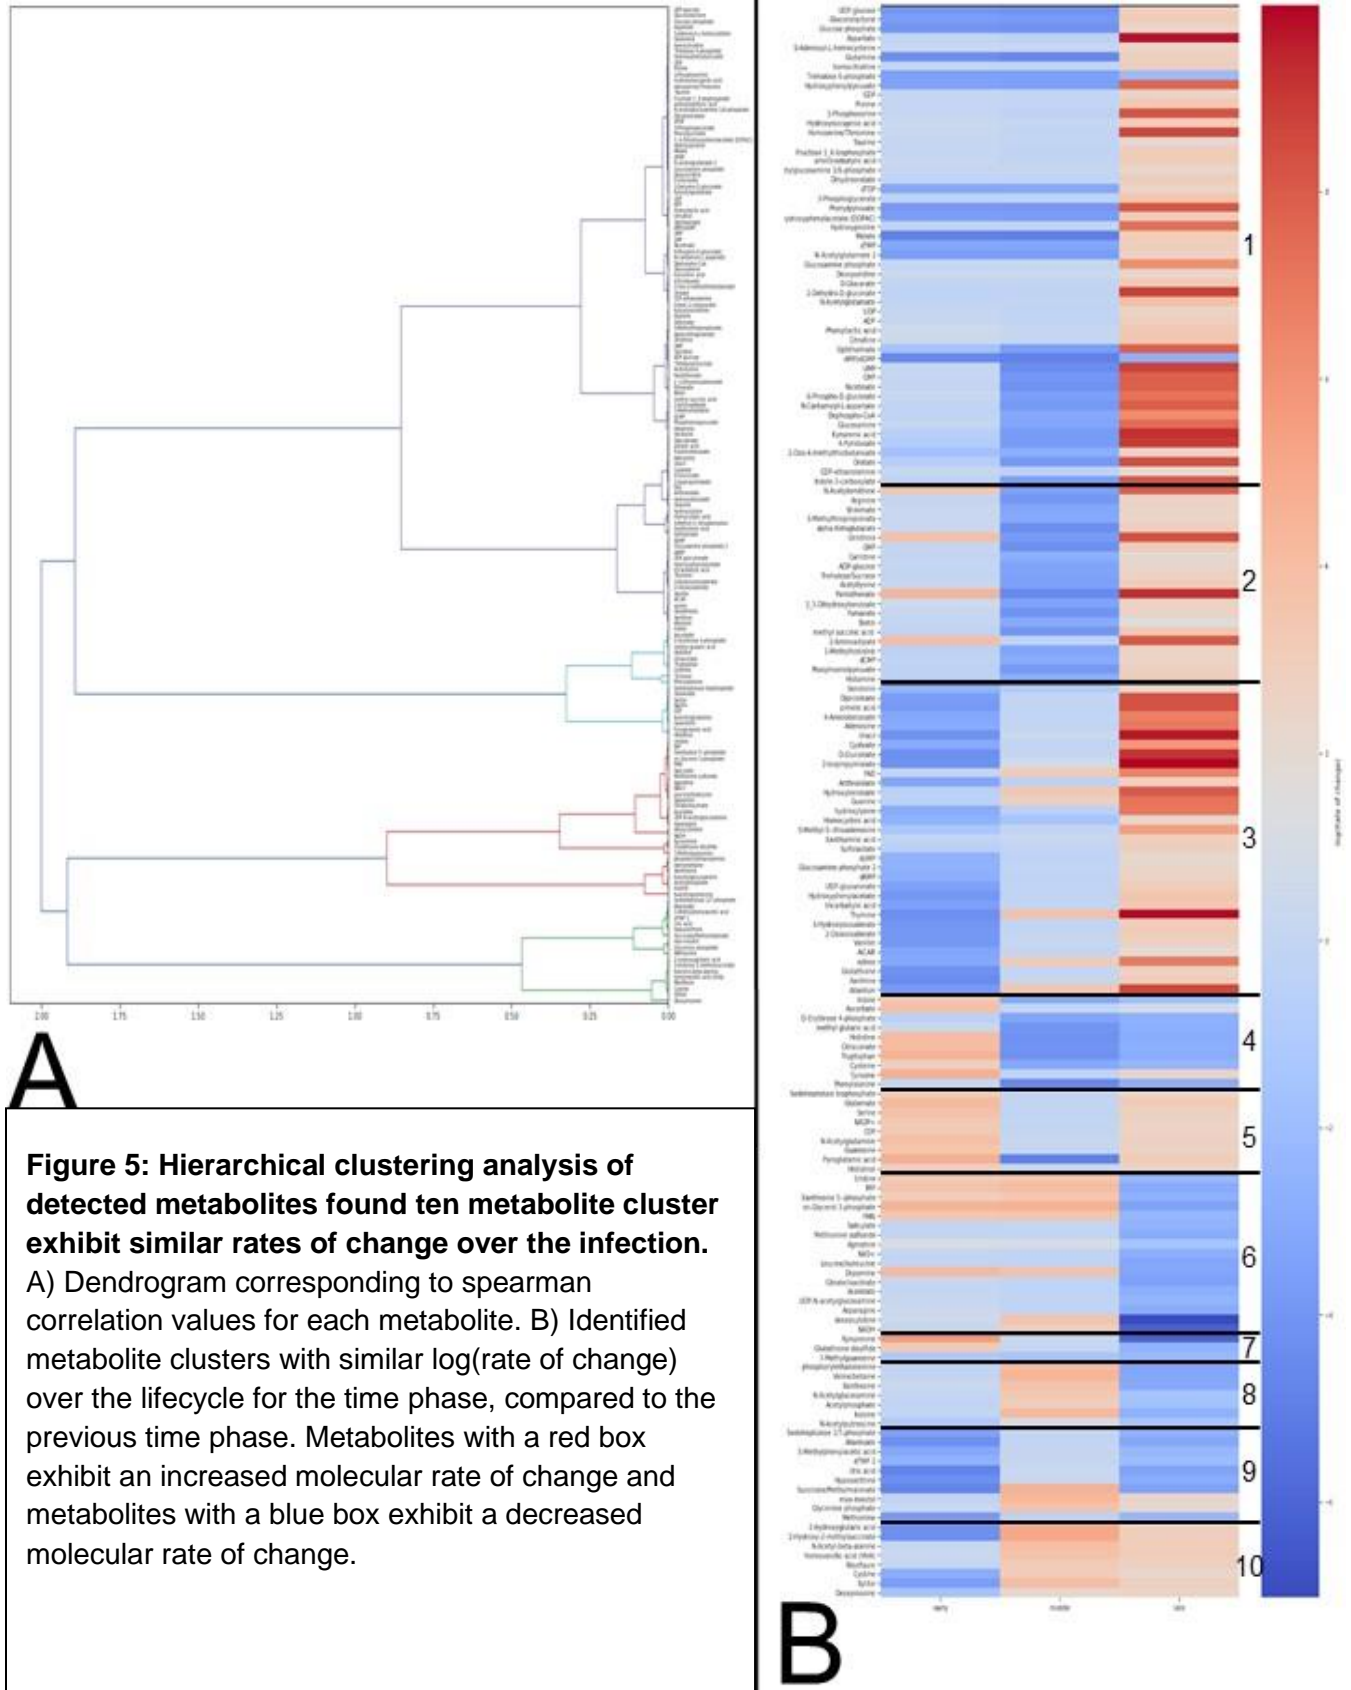

434 **Interference of insect tricarboxylic acid (TCA) cycle is critical for infection success and**  
435 **subsequent propagation of nematodes**

436 To identify significant metabolites that are important for infection progression, an ANOVA  
437 with post-hoc Tukey's HSD test was performed on metabolite abundances throughout the  
438 lifecycle. Two comparisons were examined: metabolite abundances from uninfected insects  
439 compared to individual time points, and individual time points compared to the next subsequent  
440 time point. As summarized in Figure 6, TCA cycle components significantly ( $p < 0.05$ ) fluctuate in  
441 relation to uninfected insects as well as between time phases, throughout the time course.

442 In the early phase of infection, while the insect is still alive and combatting bacteria and  
443 nematode invaders using innate immunity, several key TCA cycle intermediates are reduced in  
444 abundance relative to an uninfected insect (Fig. 6). This is shown through significantly  
445 decreased abundances of citrate in the Hour 12 and Hour 24 living insects compared to the  
446 uninfected insect and the Hour 24 dead insects. Although not significant, a similar trend is  
447 observed for two other TCA-related metabolites, malate and *sn*-glycerol-3-phosphate, which  
448 aids in  $\text{NAD}^+$  regeneration through the glycerol phosphate shuttle, as well as  $\text{NAD}^+$ ,  $\text{NADH}$ ,  
449 fumarate {Shi, 2018}. This could mean these metabolites were diverted for the immune  
450 response, given the differences between the living and dead insects. As the infection  
451 progresses into a middle phase, citrate abundances flux, but generally are decreasing. Into the  
452 late phase on Day 10, malate, *sn*-glycerol phosphate, succinate, and citrate all drop, which  
453 could suggest carbon is being stored (rather than used) in the IJs before they exit the cadaver.

454 TCA cycle components were mostly in Cluster 6 (*sn*-glycerol-3-phosphate,  $\text{NAD}^+$ ,  
455  $\text{NADH}$ , citrate and isocitrate) and Cluster 2 (fumarate, alpha-Ketoglutarate). Student t-tests were  
456 utilized to determine additional significant components by comparing each broad time phase to  
457 the uninfected insects (File S3). Acetylphosphate was found to be approaching significantly high  
458 ( $p < 0.1$ ) at the early phase and was significantly high ( $p < 0.05$ ) at the middle and late phases.

459 NAD<sup>+</sup> was found to be approaching significantly low ( $p < 0.1$ ) at the early and middle phases and  
 460 was significantly low ( $p < 0.05$ ) for the late phase. *Xenorhabdus* spp. cannot synthesize NAD<sup>+</sup>  
 461 and requires nicotinate for growth {Orchard, 2004; Martens, 2005}. Generally, the trend for all  
 462 TCA components in the lifecycle seem to be decreasing as the infection progresses with the  
 463 exceptions of acetylphosphate, FAD, and succinate.  
 464

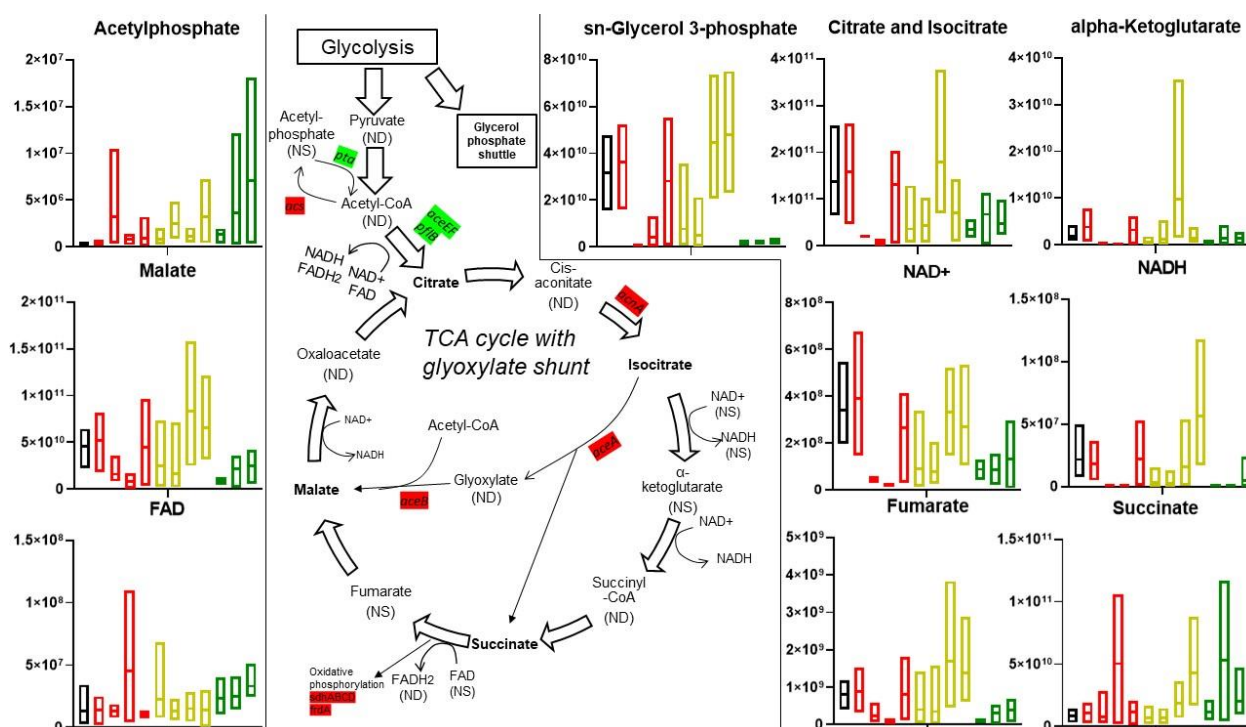

465 **Figure 6: Infection with *S. carpocapsae* IJs affects insect TCA cycle.** Normalized molecular  
 466 concentration box plots throughout the lifecycle are shown for all detected metabolites involved  
 467 in the TCA cycle. Box plot colors represent which time phase the individual plots belong to for:  
 468 uninfected (black), early infection (red, going from earliest, 1hr, to latest, 24 hours dead, time  
 469 points), middle infection (yellow, days 2-8), and late infection (green, days 10-16). Lines in the  
 470 middle of the boxes indicate the mean molecular concentration. Bolded metabolites indicate  
 471 significant concentration shifts during the life cycle. NS indicates detection, but not significantly  
 472 affected (through the ANOVA) throughout infection. ND indicates not detectable. Highlighted

473 genes were detected as significant for the microarray in the  $\Delta$ *lrhA* and  $\Delta$ *rpoS* strains. Green  
474 indicates positive regulation, red indicates negative regulation.

475 The aforementioned *X. nematophila* mutants experienced differences in transcripts  
476 involved in either pyruvate metabolism, glyoxylate metabolism, or the TCA cycle (File S2). Most  
477 of these genes were regulated in the  $\Delta$ *lrhA* and  $\Delta$ *rpoS* mutant backgrounds. *aceA* and *aceB* are  
478 negatively regulated, while *aceE* and *aceF* were positively regulated between  $\Delta$ *lrhA* and  $\Delta$ *rpoS*  
479 mutant strains and WT. These genes are involved in the glyoxylate shunt which is a pathway  
480 utilized by many bacteria and nematodes to convert 2-carbon compounds into energy  
481 resources, in the absence of bountiful sugars {Maloy, 1982}.  $\Delta$ *rpoS* mutants upregulate several  
482 succinate dehydrogenase genes which are necessary for oxidative phosphorylation. In *E. coli*  
483 these genes are regulated in response to different environmental conditions like iron and heme  
484 availability {Park, 1995}.

485 Acetyl-coA is an important node in metabolism, connecting glycolysis, the TCA cycle,  
486 fatty acid, amino acid, and secondary metabolite pathways, and acetate dissimilation {Wolfe,  
487 2015}. RpoS and LrhA positively influence the expression of AceF, PflB, Pta, and AckA. Pta-  
488 AckA comprise the acetate dissimilation (excretion) pathway {Wolfe, 2015}. Coordinated  
489 elevation of these enzymes is predicted to result in lower levels of acetyl-coA and higher levels  
490 of acetylphosphate and acetate, which is excreted and available for use by the nematodes.  
491 Acetylphosphate is a phosphoryl donor for some response regulators and can be a donor for  
492 protein acetylation. Protein acetylation, a ubiquitous post-translational modification in  
493 prokaryotes and eukaryotes, is involved in regulation of many different bacterium-host  
494 interactions like chemotaxis, replication, and acid resistance, as well as regulating bacterial  
495 DNA-binding and protein stability {Ren, 2017}. Acetylphosphate was detected in the  
496 metabolome and generally increased over the infection, as well as being a VIP>1 metabolite for  
497 components 1 and 2. Acetate freely diffuses across membranes and can be incorporated into

498 biomass of both bacteria and nematodes via the glyoxylate shunt {Alaimo, 2012}. *pflB* is  
499 predicted to encode the pyruvate-formate lyase (PFL) enzyme involved in conversion of  
500 pyruvate and CoA into formate and acetyl-coA and is greatly (>7 [fold change]) downregulated  
501 in the  $\Delta rpoS$  and  $\Delta lrhA$  mutants relative to wild type. PflB converts glucose to formate, and up to  
502 one-third of the carbon procured from glucose is converted through this enzyme in *E. coli*  
503 {Doberenz, 2014}. PFL condenses acetyl-CoA and formate, allowing for the microbes to use  
504 acetate and formate (fermentation products) as the sole carbon sources {Zelcbuch, 2016}.  
505 RpoS and LrhA negatively regulate Acs, which is the acetate assimilation pathway {Wolfe,  
506 2015}. In *E. coli*, Acs activity is inhibited by acetylation of a conserved lysine and its abundance  
507 is negatively regulated by the small RNA SdhX {You, 2014; De Mets, 2019}. RpoS and LrhA  
508 also both negatively regulate the TCA cycle enzymes AcnA and AceAB, and this inhibition is  
509 predicted to result in accumulation of citrate. Citrate and isocitrate progressively decrease in  
510 abundance over the infection cycle and these combined data might indicate that citrate  
511 produced and accumulated by *X. nematophila* bacteria may be a provision for nematodes,  
512 consumed during reproduction.

513

#### 514 **Analysis of amino acid abundances found proline fluctuates throughout the infection**

515 The amino acid pyroglutamic acid, which is a precursor to glutamate, significantly rises  
516 (as determined through the aforementioned ANOVA tests). in abundance during the late phase,  
517 at Day 16 compared to the uninfected insect and between Day 12 and Day 16. Glutamate is a  
518 precursor for proline metabolism {Watford, 2008}. Proline abundances fluctuated significantly  
519 throughout the time course. Compared to uninfected insects, proline levels were significantly  
520 lower at Day 10 and higher at Day 16, but otherwise were not significantly different. When  
521 comparing each time point to the previous, there was a significantly higher level of proline in  
522 dead insects at Hour 24 relative to living insects at the same time point. However, in dead

523 insects between Hour 24 and Day 2 the levels of proline dropped again. Thereafter there was a  
524 cycle of increase and decrease in proline abundance (Day 4<Day 6, Day 8>Day 10, Day  
525 12<Day 16), with an overall rise throughout the middle and late phases. Additional metabolites  
526 in the arginine/proline/polyamine metabolism pathways that were significantly different among  
527 samples based on student t-tests (File S3), included ornithine, which was significantly high at  
528 the early and middle infection stages compared to uninfected insects, and hydroxyproline, which  
529 was significantly high at early, middle, and late infection stages compared to uninfected insects.  
530 Hierarchical clustering analysis reveals Cluster 1 (proline and hydroxyproline) and Cluster 5  
531 (glutamate and pyroglutamic acid) contain these compounds. These cluster trends differ in the  
532 early phase, where Cluster 1 decreases while Cluster 5 increases, possibly indicating that these  
533 compounds are getting converted into each other.

534         Microarray analysis of  $\Delta lrhA$ ,  $\Delta lrp$ ,  $\Delta nilR$ ,  $\Delta rpoS$ , and secondary form *X. nematophila*  
535 mutants reveal similarities to each other in disrupted proline gene regulation compared to their  
536 wild type/primary form counterparts. *putA*, predicted to encode 1-pyrroline-5-carboxylate  
537 dehydrogenase, an enzyme involved in the conversion of proline to glutamate, was negatively  
538 regulated (2<|fold change|) in the  $\Delta lrhA$  and  $\Delta rpoS$  strains, and positively regulated in the  
539 secondary form strain. PutA is necessary for virulence in *Pseudomonas aeruginosa* and  
540 protects the bacterium against oxidative stress {Zheng, 2018}. XNC1\_2468 is downregulated in  
541 the  $\Delta lrp$ ,  $\Delta rpoS$ , and secondary form mutant backgrounds. This gene encodes a spermidine N1-  
542 acetyltransferase as part of polyamine biosynthesis from ornithine and putrescine. XNC1\_2274  
543 and XNC1\_3619 are FAD-dependent oxidoreductases involved downstream of proline  
544 metabolism in putrescine utilization and are upregulated in the  $\Delta lrhA$ ,  $\Delta lrp$ ,  $\Delta nilR$ , and  $\Delta rpoS$   
545 mutant backgrounds. These genes are mostly involved in downstream proline metabolism,  
546 specifically polyamine biosynthesis. Pathogenic gram-negative bacteria exploit polyamine-  
547 related processes of their host for growth and proliferation, using these host molecules for toxin



548 activity, biofilm production, and limiting host immune responses {Shah, 2008; Di Martino, 2013}.  
549 XNC1\_2154 is predicted to encode an enzyme with L-aspartate:2-oxoglutarate  
550 aminotransferase activity and is downregulated in the secondary form and  $\Delta Irp$  mutant  
551 backgrounds.

552 Amino acids leucine, isoleucine, and phenylalanine amino acids were significantly higher  
553 in abundance at the late stage of infection. These are essential amino acids which *C. elegans*,  
554 and presumably *S. carpocapsae*, must acquire from its diet (i.e. bacteria) {Zečić, 2019}. Several  
555 *X. nematophila* genes, including *ilvC* and *ilvI*, involved in leucine/isoleucine biosynthesis were  
556 differentially regulated in the  $\Delta IrhA$  (negatively) and  $\Delta rpoS$  (positively regulates *ilvC* and  
557 negatively regulates *ilvI*) mutant backgrounds, relative to wild type.  $\Delta rpoS$  mutants had higher  
558 levels of *leuA* transcript, a gene predicted to encode a 2-isopropylmalate synthase, a leucine  
559 precursor which is increases throughout the lifecycle.  $\Delta IrhA$  increased transcript abundances of  
560 *fadA*, *fadB*, *fadI*, and *fadJ* which participate in the conversion of leucine and isoleucine into fatty  
561 acids and acetyl-CoA. In the  $\Delta Irp$  and  $\Delta rpoS$  mutant backgrounds, *mmsA* was upregulated,  
562 another gene that encodes a methylmalonate-semialdehyde dehydrogenase that participates in  
563 the breakdown of leucine and isoleucine.

564

## 565 **DISCUSSION**

566 A comprehensive framework to understand how metabolism shifts during infection  
567 lifecycles of entomopathogenic nematodes was established. Physiologically, it was examined  
568 that *X. nematophila* bacteria consume insect tissues, while *S. carpocapsae* nematodes  
569 consume bacteria. The high  $TP_{\text{glu-phe}}$  of 4.5 observed in the nematodes emerging from an insect  
570 cadaver suggests the IJs were potentially cannibalizing previous generations of nematodes  
571 and/or feeding upon bacteria that were, themselves, already feeding on previous generations of  
572 nematodes and bacteria, since if the colonizing nematodes were feeding on bacterial and insect

573 biomass only, they would register at around 3.5 Thus, this high trophic level suggests either  
574 *endotokia matricida* (or bagging) in which nematode eggs hatch within and consume the  
575 mother. likely during the second generation of nematodes when nutrients are becoming  
576 depleted, or that some other form of cannibalism is occurring within the cadaver {Baliadi, 2004}.  
577 A  $TP_{glu-phe}$  of 4.6 is similar to many apex predators, such as large marine carnivores or the rare  
578 top predators observed in terrestrial ecosystems {Chikaraishi, 2011; Chikaraishi, 2014; Steffan,  
579 2013; Ohkouchi, 2017}. This underscores the importance of including microbes in studies of  
580 organismal trophic identity. In effect, the cadavers used in this study may represent microcosms  
581 of the broader communities and ecosystems in which they are embedded. The insect cadavers  
582 were, when alive, herbivores. To find multiple levels of carnivory within a single cadaver  
583 suggests that a nematode-colonized arthropod mirrors the trophic richness of the broader food-  
584 web. The interdigitation of microbial carnivores in a trophic hierarchy—here, nematodes and  
585 bacteria—is likely a much more common feature of food-webs than previously thought {Steffan,  
586 2017, Steffan and Dharampal, 2019}. The microbial trophic identities reported in this study may  
587 necessitate a re-calibration of organismal niche concepts, but in so doing, will facilitate the  
588 unification of the macro- and microbiome in food web ecology.

589         It should be emphasized that it has been exceedingly uncommon to find higher-order  
590 consumers ( $TP > 4.0$ ) in a community or ecosystem, given that apex predators feed upon other  
591 predators that have, themselves, had to find and subdue 'lower' carnivores {Lindeman, 1942}. In  
592 classical food web ecology, apex predators are generally considered to be large, fierce, and  
593 rare vertebrates Elton, 1927, Colinvaux and Barnett, 1979}. However, perhaps the assumption  
594 that apex predators exist only within the province of large/fierce/rare vertebrates needs to be  
595 revisited. The high trophic positions exhibited by the nematodes in this study suggest that such  
596 obligate higher-order consumers are more common than previously thought, with multitudes of  
597 apex carnivores existing underfoot in many terrestrial ecosystems. Further, the nematodes can



598 be viewed as farming their symbionts: acting as shepherds that bring their bacterial flock to a  
599 fresh insect pasture for harvesting of nutrients.

600 The trophic study established the foundation to understand metabolic shifts occurring in  
601 the cadaver. The time course metabolomics study sought to better understand the process of  
602 bioconversion in the cadaver, how is the insect biomass being converted to bacterial and  
603 nematode biomass? Applying multivariate statistical tests to the infection metabolomics data set  
604 revealed distinct time phase clustering. The variance among the time phases seems to increase  
605 as infection progresses, as the healthy insects degrades into bacteria and nematode tissue.  
606 Nematode IJ samples were also compared to these time phases. These samples form a distinct  
607 cluster away from the other time phases (File S5). The IJ samples completely removed from the  
608 lifecycle seem to have metabolic profiles most similar to the late time phase, which are insect  
609 samples bursting with nematodes (Fig. 3). However, it is important to note that these are input  
610 IJs that have spent weeks outside of an insect cadaver. Reassessing this analysis with output  
611 IJs that are recently from the nematode is important to follow up on.

612 Metabolic analysis revealed TCA cycle components were among the most significant  
613 results, indicating that their use by the entomopathogenic nematodes is paramount to infection  
614 success and subsequent nematode propagation. Citrate metabolism is ubiquitous in many  
615 intracellular pathogens and has been found to be involved in regulating virulence {Martino,  
616 2018}. Citrate is necessary for virulence and growth of the Gram-negative pathogenic bacteria  
617 *Pseudomonas aeruginosa*, where NADH levels were reduced when the bacterium was treated  
618 with citrate and host-killing activity was abolished as a result {Perinbam, 2020}. This group  
619 hypothesized that this could be due to decreased flux through the glyoxylate bypass, which has  
620 been found to activate the T3SS in this system {Chung, 2013}. As mentioned, *X. nematophila*  
621 does not encode a T3SS, but does have the evolutionarily related flagellar export apparatus.  
622 Several *X. nematophila* glyoxylate bypass genes, were differentially transcribed between  
623 avirulent genetic mutants and WT. Glyoxylate was not detected in our screen, and whether flux

624 through this pathway affects virulence should be investigated further. The significant flux of TCA  
625 metabolites during the middle phase may be indicative of the role of the TCA cycle in *S.*  
626 *carpocapsae* development, as the TCA cycle has been shown to be essential in early  
627 embryogenesis in *C. elegans* {Rahman, 2014; Hada, 2019}. Citrate synthase (*cts-1*) and cyclin-  
628 dependent kinase 1 (*cdk-1*) were inhibited in these studies and halted *C. elegans* development,  
629 and both genes have orthologs in *S. carpocapsae*. Neutral lipids are formed from *sn*-glycerol-3-  
630 phosphate and are the major energy reserve in the closely related *S. feltiae* nematodes {Wright,  
631 1997}. Fats are stored as lipid droplets in *C. elegans* dauer larvae intestines and serve as a  
632 starvation survival mechanism (Mak, 2012; O'Riordan, 1989). The previously mentioned  
633 glyoxylate bypass forms carbohydrates from fatty acids and has been implicated in extending  
634 the lifecycle of *C. elegans* {Edwards, 2013}, highlighting another role of this TCA vs. glyoxylate  
635 switching that could be happening later in the life cycle. Any indication that cholesterol is being  
636 synthesized from these intermediates can be attributed entirely to the insect's wheat germ diet,  
637 as the *X. nematophila*, *S. carpocapsae*, or *G. mellonella* cannot synthesize sterols but require  
638 them to grow {Dutky, 1967; Jing, 2020}.

639         Additionally, metabolites such as 2,3-dihydroxybenzoate that are not synthesized by *X.*  
640 *nematophila* or *S. carpocapsae* were found to increase over the infection, past insect death. *X.*  
641 *nematophila* does not encode the genes that convert 2,3-dihydroxybenzoate to the siderophore  
642 enterobactin, which bind iron to create the ferric enterobactin (FeEnt) complex {Raymond,  
643 2003}. However, *X. nematophila* encodes FepB, a periplasmic enterobactin binding protein, as  
644 well as FepC, FepD, and FepG, which transport the FeEnt into the cell. This increased  
645 abundance of this compound suggests other *G. mellonella* microbiome members that survive  
646 infection synthesize a compound that is paramount in iron extraction and could contribute to the  
647 overall fitness of this symbiosis.

648 Metabolic analysis also revealed the significance in proline throughout the lifecycle.  
649 Insect hemolymph is rich in proline and is used as a main fuel source in some species of flying  
650 insects because of its ability to oxidize carbohydrates {Teulier, 2016; Goldstrohm, 2003}. Proline  
651 can be a signal molecule inducing secondary metabolite biosynthesis in *Xenorhabdus* species.  
652 Several known virulence factors and antibiotics are regulated via exogenously supplied proline  
653 to *Xenorhabdus* cultures {Crawford, 2010}. *Xenorhabdus* species may have evolved to use  
654 proline in insect hemolymph as a preferred amino acid source capable of enhancing the  
655 bacterium's virulence as well as protecting it from various stressors it meets in the insect body.  
656 Proline catabolism has also been implicated in promoting stress responses and modulating  
657 innate immunity in *C. elegans*, highlighting a possible mechanism by which *S. carpocapsae*  
658 survives reactive oxygen species produced by the insect, bacterium, or themselves {Tang,  
659 2016}. Enhanced understanding of proline changes over time in the EPNB lifecycle highlights  
660 the multiple roles this amino acid is playing for both *Xenorhabdus* virulence and *Steinernema*  
661 protection and reproduction. Additional amino acids were found to exhibit similar concentration  
662 shifts over the lifecycle via the hierarchical clustering analysis. This machine learning technique  
663 can be improved with higher granularity of sample time points, which would strengthen the  
664 software developed for this study and allowing it to be used to study more complex and dynamic  
665 chemical environments.

666 We have shown how the parasitic EPNB infection shapes the insect host metabolism.  
667 The trophic hierarchy improved how we understand the parasites replicate in the host and  
668 highlights the importance of including microbes in these studies. Through rigorous metabolic  
669 pathway reconstruction and multivariate statistics, these results suggest each phase of the  
670 symbiosis can be characterized by stage-specific chemical signatures. Future targeted  
671 metabolomics experiments on EPNB symbioses should be developed to expand the specific

672 trends elucidated by this study. This work adds to a growing scientific foundation on how  
673 symbioses, both mutualistic and parasitic, shape the chemical environments they inhabit.

## 674 **MATERIALS AND METHODS**

### 675 **Conventional nematode and aposymbiotic nematode production**

676 *S. carpocapsae* nematodes (All strain) were propagated through 5<sup>th</sup> instar larvae of insect *G.*  
677 *mellonella* and using white trap and conventional IJs were collected by trapping in distilled water  
678 at stored at room temperature for <1.5 months {McMullen, 2014}. To generate aposymbiotic IJs,  
679 *X. nematophila*  $\Delta SR1$  mutant were grown in Luria Broth (LB) media overnight at 30°C on cell  
680 culture wheel and 600 $\mu$ L of overnight bacterial culture were spread onto each of 10mL of lipid  
681 agar to grow into confluent lawn at 25°C for 48 hours. Conventional IJs were surface-sterilized,  
682 seeded onto  $\Delta SR1$  mutant lawn on lipid agar plates (5000 IJs per 10mL media), and incubated  
683 at 25°C for 7 days in dark for nematode reproduction. Aposymbiotic IJs were collected by water-  
684 trapping using distilled water and stored at room temperature in dark {McMullen, 2014}.

### 685 ***In vitro* controlled feeding experiment**

686 To collect bacteria sample feeding on terrestrial C3 plants and yeast-based media, *X.*  
687 *nematophila* wildtype or  $\Delta SR1$  mutant bacteria were grown in the dark yeast soy broth (0.5%  
688 yeast extract, 3% tryptic soy broth, and 0.5% NaCl) modified from the bacterial growth media  
689 from {Buecher and Popiel., 1989} at 30°C on cell culture wheel. Wildtype bacterial overnight  
690 cultures (5mL per condition per biological replicate) were collected into microfuge tubes, spun  
691 down at >5000RPM, and washed for three times using 1x PBS buffer by resuspending and  
692 spinning down the bacterial pellets. Exactly 600 $\mu$ L of  $\Delta SR1$  mutant were spread onto yeast-soy  
693 lipid agar plates (0.5% yeast extract, 3% tryptic soy broth, 1.5% agar, 0.2% MgCl<sub>2</sub>, 0.7% corn  
694 syrup, 0.4% soy bean oil, supplemented with 40 $\mu$ g cholesterol at per liter of media) and  
695 incubated for 48h at 25°C to grow into a confluent lawn. Bacterial lawns were washed off the

696 agar plate using 1x PBS, pelleted and washed as described above. Three individual tubes of  
697 bacterial culture were used per strain as three independent biological replicates.

698 To grow nematodes using a controlled diet, approximately 5000 conventional IJs were surface-  
699 sterilized and seeded onto bacterial lawn grown on yeast-soy lipid agar plate as described  
700 above. Three individual yeast-soy lipid agar plates were used as three biological replicates for  
701 each bacterial condition. Three days post seeding IJs, first generation reproductive stage of  
702 nematodes (adult males and females) were collected by flooding the bacterial lawn with 1x PBS  
703 buffer to resuspend the nematodes. The nematode suspension were collected in the glass cell  
704 culture tube and washed for three times by resuspending in 1x PBS buffer. Seven days post  
705 seeding the IJs, second generation IJ progenies were collected using distilled water traps and  
706 washed in water for three times (settle by gravity and resuspension).

#### 707 ***In vivo* feeding experiment and sample collection**

708 To prepare insect controls, *G. mellonella* 5<sup>th</sup> instar larvae were injected with 10uL of either 1x  
709 PBS buffer, yeast-soy broth media, or nothing. Three insect larvae were prepared per condition  
710 as three biological replicates.

711 To collect nematodes directly fed on *Galleria* insect tissues, *S. carpocapsae* axenic eggs were  
712 extracted from adult female nematodes grown on yeast-soy lipid agar plates. Approximately  
713 6000 axenic eggs were seeded to each of the *Galleria*-tissue agar plate (20% (w/v) frozen *G.*  
714 *mellonella* insects cleaned, blended and filtered; 0.5% (w/v) NaCl; and 1.5% (w/v) agar,  
715 supplemented with 50mg/L Kanamycin). Mixed-stages of nematodes were collected by flooding  
716 the *Galleria*-tissue agar with 1x PBS to resuspend the nematodes, then washed in 1x PBS and  
717 water for 3 times to separate nematodes from insect tissue debris.

718 To establish controlled feeding experiments *in vivo* for bacteria and nematodes, *X. nematophila*  
719 overnight cultures (in yeast-soy broth) were diluted in 1xPBS buffer, approximately 10<sup>4</sup> bacterial

720 cells were injected with or without aposymbiotic nematodes (100 IJs per insect). Insect cadaver  
721 injected with bacteria only were directly lyophilized and used as insect-bacteria complex  
722 controls (see methods below). Insects with bacteria and nematodes co-injection mixture were  
723 used to collect IJ progenies by water-trapping, washing (3x in distilled water), and pelleting the  
724 IJ samples. Three to five insects were used for each experimental condition as biological  
725 replicates.

## 726 **Nematode lyophilization and trophic position analysis**

727 Nematodes from *G. mellonella* were collected by placing infected cadavers in modified White  
728 traps in which nematodes migrate into distilled water. Trapped nematodes were transferred to  
729 Falcon test tubes and allowed settle into a pellet at the bottom of the tube. Nematodes from  
730 plate cultivations were harvested by rinsing with sterile distilled water, transferred to Falcon test  
731 tubes, and allowed to settle. Samples of nematodes were stored in water at 10°C no longer than  
732 a few days until they were lyophilized. For lyophilization, water was decanted off of the sample  
733 until only the undisturbed pellet remained at the bottom of the test tube. The top of the test tube  
734 was covered with a Kimwipe held in place with a rubber band before lyophilization for >48 h in a  
735 Labconco Freezone lyophilizer. During this time, pressures fell below 0.2 millibar, and  
736 temperatures reached -50°C. Once the samples had been thoroughly lyophilized, they were  
737 removed from tubes using a laboratory spatula that was sterilized with ethanol and dried with  
738 kimwipe after every use. Each individual sample was relocated into a sterile 1.5 ml microfuge  
739 tube and stored at room temperature for 1-3 months until shipment to Hokkaido, Japan for  
740 analysis.

741 Trophic position ( $TP_{glu-phe}$ ) estimates were generated using the following equation:

$$742 \quad TP = \frac{\delta^{15}N_{glu} - \delta^{15}N_{phe} + |\beta|}{\Delta_{glu-phe}} + \lambda$$

743 where  $\delta^{15}\text{N}_{\text{glu}}$  represents the nitrogen isotopic ratio of glutamic acid,  $\delta^{15}\text{N}_{\text{phe}}$  represents the  
744 nitrogen isotopic ratio of phenylalanine,  $\beta$  corrects for the difference in  $^{15}\text{N}$  values between  
745 glutamic acid and phenylalanine within the primary producers of the food web (e.g.  $\beta \sim 8.4\text{‰}$  for  
746 C3 plants),  $\Delta_{\text{glu-phe}}$  represents the net trophic discrimination between glutamic acid and  
747 phenylalanine, and  $\lambda$  represents the basal trophic level ( $=1$ ) of the food web {Chikaraishi, 2014}.  
748 The trophic discrimination factor,  $\Delta_{\text{glu-phe}}$  (referred to here as the  $\text{TDF}_{\text{glu-phe}}$ ), represents the net  
749 intertrophic  $^{15}\text{N}$ -discrimination between glutamic acid and phenylalanine. Significant differences  
750 between known and observed TP values were examined using univariate ANOVA and  
751 nonparametric tests (paired Wilcoxon signed rank tests where data were heteroscedastic).  
752 Distinguishing among TDF values was accomplished using paired t tests {Steffan, 2015}.

### 753 **Metabolomics sample collection**

754 As per normal infection protocols, 11 *G. mellonella* larvae (Grubco) were placed in the bottom of  
755 each of six 6 x 1.5 cm petri plates lined with 2 pieces of #1 filter paper. The filter paper was then  
756 inoculated with 1 ml of conventional *S. carpocapsae* IJ stage nematodes (carrying *X.*  
757 *nematophila* bacteria in their intestinal receptacle) to achieve a final average concentration of 10  
758 IJ/ $\mu\text{l}$ . At each specified time point (see below), one *G. mellonella* was taken from each of plates  
759 1-5. All insect samples were flash frozen using a dry ice-ethanol bath, and subsequently stored  
760 at  $-80^\circ\text{C}$ . The uninfected, Hour 1 post-infection and Hour 12 post-infection data points were  
761 taken of live *G. mellonella*. Since the *G. mellonella* were starting to succumb to the infection at  
762 Hour 24, one living and one dead insect was taken at this time point. At Day 7 post-infection, a  
763 water trap was set up to enable IJ emergence. At Day 12, the last of the *G. mellonella* from  
764 plates 1-5 was used, so insects representing the Day 16 time point were taken entirely from  
765 plate 6. Input *S. carpocapsae* IJ and *X. nematophila* symbionts were also collected from the lab  
766 stocks and sent for analysis, approximately 50  $\mu\text{l}$  of settled IJ per sample, and a total of 4  
767 samples were sent.



## 768 **Preparation for mass spectrometry**

769 For metabolite extraction, *G. mellonella* insects were equilibrated to -20°C for ~1 h, 300 µl of  
770 extraction solution (40:40:20 acetic acid, methanol, and water) was added, and insects were  
771 ground using a pestle that fit snugly into the sample tube. All manipulations were performed in a  
772 cold room and samples were processed in groups of 12. After grinding, to each tube an  
773 additional 1000 µl of extraction solution was added and vortexed for 5-10 sec before being  
774 placed at -20°C for 20 min. Tubes were centrifuged at 16,200 x g for 5 min, and the supernatant  
775 was decanted to a clean tube. To the original insect sample an additional 200 µl of extraction  
776 solution was added, mixed with a pipette tip, vortexed for 5-10 sec, and incubated at -20°C for  
777 20 min. After pelleting the supernatant was combined with the first supernatant sample.  
778 Samples were dried (Savant), resuspended, and randomized samples were analyzed  
779 consecutively by mass spectrometry using an established 25 minute method (Lu, 2010).

## 780 **Metabolomics analysis**

781 An established untargeted metabolomics method utilizing ultra-high performance liquid  
782 chromatography coupled to high resolution mass spectrometry (UHPLC-HRMS) (Thermo  
783 Scientific, San Jose, CA, USA) was used to analyze water-soluble metabolites {Lu, 2010}. A  
784 Synergi 2.6 µm Hydro RP column 100 Å, 100 mm x 2.1 mm (Phenomenex, Torrance, CA) and  
785 an UltiMate 3000 pump (Thermo Fisher) were used to carry out the chromatographic  
786 separations prior to full scan mass analysis by an Exactive Plus Orbitrap MS (Thermo Fisher).  
787 HPLC grade solvents (Fisher Scientific, Hampton, NH, USA) were used. Chromatographic peak  
788 areas for each detected metabolite were integrated using an open-source software package,  
789 Metabolomic Analysis and Visualization Engine (MAVEN) {Clasquin, 2012; Melamud, 2010}.  
790 Area under the curve (AUC) was used for further analyses.

## 791 **Statistical analysis**



792 PLS-DA plots were generated in MetaboAnalyst 4.0 on August 3rd, 2020. VIP scores were  
793 calculated for each component. When more than components are used to calculate the feature  
794 importance, the average of the VIP scores are used. The other importance measure is based on  
795 the weighted sum of PLS-regression. The weights are a function of the reduction of the sums of  
796 squares across the number of PLS components {Chong, 2020}. Samples were normalized  
797 before processing through MetaboAnalyst based on insect weight. Data was log transformed  
798 and pareto scaling was applied. Two-way ANOVA with multiple comparisons and Tukey post-  
799 hoc tests were completed by taking individual time point metabolite abundances and comparing  
800 their means to the uninfected insect model and each other. Student t-tests were performed by  
801 comparing uninfected samples to each time phase (early, middle, and late infection). Relevant  
802 metabolic pathways were identified in MetaboAnalyst's "Pathway Analysis" module using  
803 *Drosophila melanogaster*, *Caenorhabditis elegans*, and *Escherichia coli* as KEGG pathway  
804 libraries {Kanehisa, 2017}. Technical details for the hierarchical clustering analyses are  
805 available at: <http://doi.org/10.5281/zenodo.3962081>

#### 806 **Bacterial strains, plasmids, and culture conditions**

807 File S2 lists strains used for this study with references where they were originally published.  
808 Unless specifically mentioned, *E. coli* were grown in LB broth or on LB plates at 37°C; *X.*  
809 *nematophila* were grown in LB broth or on LB plates supplemented with 0.1% pyruvate at 30°C  
810 and kept in dark. Where appropriate, the following antibiotic concentrations were used:  
811 ampicillin, 150 µg/ml for *E. coli* and 50 µg/ml for *X. nematophila*; chloramphenicol, 30 µg/ml;  
812 erythromycin, 200 µg/ml; kanamycin, 50 µg/ml and streptomycin, 25 µg/ml. *E. coli* donor strain  
813 S17 ( $\lambda$ pir) or  $\Delta$ asd strain BW29427 was used to conjugate plasmids into *X. nematophila*.

#### 814 **Microarray experiment and data analysis**

815 Bacteria cultures were grown overnight in 3 ml of LB supplemented with 0.1% pyruvate and  
816 appropriate antibiotics in culture tubes at 30°C on roller, subcultured 1:100 into 30 ml of LB  
817 supplemented with 0.1% pyruvate and 50 g/ml ampicillin in 125 ml glass flasks and grown for 12  
818 hours to early stationary phase (OD 2-2.1) at 30°C at 150 rpm on shaker. 1 ml of each culture  
819 was used to extract total RNA using Qiagen RNeasy Mini Kit, and on-column DNA digestion  
820 was performed using Qiagen RNase-Free DNase Set according to manufacturer's protocol  
821 (Qiagen, Valencia, CA). The RNA purity was tested by measuring 260 nm/280 nm and 260  
822 nm/230 nm ratios in TE buffer and the values should be over 1.8. RNA integrity was verified by  
823 running 2 g of RNA samples on 1% denaturing agarose gel. The samples were then submitted  
824 to Roche NimbleGen for processing and microarray analysis. Gene signals for *lrhA*, *lrp*, and  
825 secondary form *X. nematophila* were compared to HGB800 using a 2-fold change average  
826 signal strength cutoff. The *rpoS* mutant was compared to HGB007 using the same significance  
827 cutoff. Genes were annotated via the Magnifying Genomes (MaGe) microbial genome  
828 annotation system {Vallenet, 2006}, the STRING database {Szklarczyk, 2019}, as well as  
829 through BlastKOALA {Kanehisa, 2016}.

## 830 **ACKNOWLEDGEMENTS**

831 This work was supported by a grant to H.G.-B. from the National Science Foundation (IOS-  
832 1353674) and by funds from the University of Tennessee-Knoxville. M.C. was supported by a  
833 UW-Madison Louis and Elsa Thomsen Wisconsin Distinguished Graduate Fellowship and a  
834 Department of Bacteriology Michael Foster Predoctoral Fellowship. We thank Terra Mauer for  
835 her help in insect rearing and providing the *G. mellonella* image used for Figure 1. We thank  
836 Xiaojun Lu for preprocessing the microarray data. We thank Jordan Rogerson for processing  
837 the metabolomics samples prior analysis.

838

839 **REFERENCES**

- 840 1. **Abdelhamed H., Ramachandran R., Narayanan L., Ozdemir O., Cooper A., Olivier**  
841 **A. K., Karsi A., Lawrence M. L.** (2020). Contributions of a LysR Transcriptional  
842 Regulator to *Listeria monocytogenes* Virulence and Identification of Its Regulons. *J*  
843 *Bacteriol*, 202(10). doi:10.1128/JB.00087-20
- 844 2. **Alaimo J. T., Davis S. J., Song S. S., Burnette C. R., Grotewiel M., Shelton K. L.,**  
845 **Pierce-Shimomura J. T., Davies A. G., Bettinger J. C.** (2012). Ethanol metabolism  
846 and osmolarity modify behavioral responses to ethanol in *C. elegans*. *Alcohol Clin Exp*  
847 *Res*, 36(11), 1840-1850. doi:10.1111/j.1530-0277.2012.01799.x
- 848 3. **Baliadi Y, Yoshiga T, Kondo E.** (2004) Infectivity and post-infection development of  
849 infective juveniles originating via endotokia matricida in entomopathogenic nematodes.  
850 *Applied Entomology and Zoology*;39:61–69.
- 851 4. **Budnick J. A., Sheehan L. M., Ginder M. J., Failor K. C., Perkowski J. M., Pinto J.**  
852 **F., Kohl K. A., Kang L., Michalak P., Luo L., Heindl J. E., Caswell C. C.** (2020). A  
853 central role for the transcriptional regulator VtIR in small RNA-mediated gene regulation  
854 in *Agrobacterium tumefaciens*. *Sci Rep*, 10(1), 14968. doi:10.1038/s41598-020-72117-0
- 855 5. **Buecher E. J., Popiel I.** (1989). Liquid Culture of the Entomogenous Nematode  
856 *Steinernema feltiae* with Its Bacterial Symbiont. *J Nematol*, 21(4), 500-504. Retrieved  
857 from <https://www.ncbi.nlm.nih.gov/pubmed/19287644>
- 858 6. **Blumer C., Kleefeld A., Lehnen D., Heintz M., Dobrindt U., Nagy G., Michaelis K.,**  
859 **Emödy L., Polen T., Rachel R., Wendisch V. F., Uden G.** (2005). Regulation of type  
860 1 fimbriae synthesis and biofilm formation by the transcriptional regulator LrhA of  
861 *Escherichia coli*. *Microbiology*, 151(Pt 10), 3287-3298. doi:10.1099/mic.0.28098-0
- 862 7. **Cambon M. C., Lafont P., Frayssinet M., Lanois A., Ogier J. C., Pages S.,**  
863 **Parthuisot N., Ferdy J. B., Gaudriault S.** (2020). Bacterial community profile after the

- 864 lethal infection of *Steinernema-Xenorhabdus* pairs into soil-reared *Tenebrio molitor*  
865 larvae. *FEMS Microbiol Ecol*, 96(2). doi:10.1093/femsec/fiaa009
- 866 8. **Camilli A., Bassler B. L.** (2006). Bacterial small-molecule signaling pathways. *Science*,  
867 311(5764), 1113-1116. doi:10.1126/science.1121357
- 868 9. **Cao M., Goodrich-Blair H.** (2020). *Xenorhabdus nematophila* bacteria shift from  
869 mutualistic to virulent Lrp-dependent phenotypes within the receptacles of *Steinernema*  
870 *carpocapsae* insect-infective stage nematodes. *Environ Microbiol*, 22(12), 5433-5449.  
871 doi:10.1111/1462-2920.15286
- 872 10. **Chaston J., Douglas A. E.** (2012). Making the most of "omics" for symbiosis research.  
873 *Biol Bull*, 223(1), 21-29. doi:10.1086/BBLv223n1p21
- 874 11. **Chaston J. M., Suen G., Tucker S. L., Andersen A. W., Bhasin A., Bode E., Bode H.**  
875 **B., Brachmann A. O., Cowles C. E., Cowles K. N., Darby C., de Léon L., Drace K.,**  
876 **Du Z., Givaudan A., Herbert Tran E. E., Jewell K. A., Knack J. J., Krasomil-**  
877 **Osterfeld K. C., Kukor R., Lanois A., Latreille P., Leimgruber N. K., Lipke C. M., Liu**  
878 **R., Lu X., Martens E. C., Marri P. R., Médigue C., Menard M. L., Miller N. M.,**  
879 **Morales-Soto N., Norton S., Ogier J. C., Orchard S. S., Park D., Park Y., Qurollo B.**  
880 **A., Sugar D. R., Richards G. R., Rouy Z., Slominski B., Slominski K., Snyder H.,**  
881 **Tjaden B. C., van der Hoeven R., Welch R. D., Wheeler C., Xiang B., Barbazuk B.,**  
882 **Gaudriault S., Goodner B., Slater S. C, Forst S., Goldman B. S., Goodrich-Blair H.**  
883 (2011). The entomopathogenic bacterial endosymbionts *Xenorhabdus* and  
884 *Photorhabdus*: convergent lifestyles from divergent genomes. *PLoS One*. 6(11):e27909.  
885 doi: 10.1371/journal.pone.0027909. PMID: 22125637; PMCID: PMC3220699.
- 886 12. **Chikaraishi Y., Kashiyama Y., Ogawa N. O., Kitazato H., Ohkouchi N.** (2007).  
887 Biosynthetic and metabolic controls of nitrogen isotopic composition of amino acids in  
888 marine macroalgae and gastropods: implications for aquatic food web studies. *Mar.*  
889 *Ecol. Prog. Ser.* 342: 85– 90.

- 890 13. **Chikaraishi Y., Ogawa N. O., Kashiyama Y., Takano Y., Suga H., Tomitani A.,**  
891 **Ohkouchi N.** (2009). Determination of aquatic food-web structure based on compound-  
892 specific nitrogen isotopic composition of amino acids. *Limnol. Oceanogr. Methods* 7:  
893 740– 750.
- 894 14. **Chikaraishi Y., Ogawa N.O., Doi H., Ohkouchi N.** (2011)  $^{15}\text{N}/^{14}\text{N}$  ratios of amino acids  
895 as a tool for studying terrestrial food webs: a case study of terrestrial insects (bees,  
896 wasps, and hornets). *Ecol. Res.*;26:835–844.
- 897 15. **Chikaraishi Y., Steffan S. A., Ogawa N. O., Ishikawa N. F., Sasaki Y., Tsuchiya M.,**  
898 **Ohkouchi N.** (2014). High-resolution food webs based on nitrogen isotopic composition  
899 of amino acids. *Ecol Evol*, 4(12), 2423-2449. doi:10.1002/ece3.11103
- 900 16. **Chong J., Xia J.** (2020). Using MetaboAnalyst 4.0 for Metabolomics Data Analysis,  
901 Interpretation, and Integration with Other Omics Data. *Methods Mol Biol*, 2104, 337-360.  
902 doi:10.1007/978-1-0716-0239-3\_17
- 903 17. **Chung J. C., Rzepishevskaja O., Ramstedt M., Welch M.** (2013). Type III secretion  
904 system expression in oxygen-limited *Pseudomonas aeruginosa* cultures is stimulated by  
905 isocitrate lyase activity. *Open Biol*, 3(1), 120131. doi:10.1098/rsob.120131
- 906 18. **Ciche T. A., Blackburn M., Carney J. R., Ensign J. C.** (2003). Photobactin: a catechol  
907 siderophore produced by *Photobacterium luminescens*, an entomopathogen mutually  
908 associated with *Heterorhabditis bacteriophora* NC1 nematodes. *Appl Environ Microbiol*,  
909 69(8), 4706-4713. doi:10.1128/aem.69.8.4706-4713.2003
- 910 19. **Clark K. D., Lu Z., Strand M. R.** (2010). Regulation of melanization by glutathione in the  
911 moth *Pseudaugasa inclusens*. *Insect Biochem Mol Biol*, 40(6), 460-467.  
912 doi:10.1016/j.ibmb.2010.04.005
- 913 20. **Clasquin M. F., Melamud E., Rabinowitz J. D.** (2012). LC-MS data processing with  
914 MAVEN: a metabolomic analysis and visualization engine. *Curr Protoc Bioinformatics*,  
915 Chapter 14, Unit14 11. doi:10.1002/0471250953.bi1411s37

- 916 21. **Cobb N. A.** (1914). Nematodes and their relationships. *Yearbook United States*  
917 *Department Agriculture*, 457-490.
- 918 22. **Colinvaux P. A., Barnett B. D.** (1979). Lindeman and the Ecological Efficiency of  
919 Wolves. *Am. Nat.*; 114: 707-718
- 920 23. **Cowles C. E., Goodrich-Blair H.** (2006). *nilR* is necessary for co-ordinate repression of  
921 *Xenorhabdus nematophila* mutualism genes. *Molecular Microbiology*, 62:760-771.
- 922 24. **Cowles C. E., Goodrich-Blair H.** (2008). The *Xenorhabdus nematophila nilABC* genes  
923 confer the ability of *Xenorhabdus* spp. to colonize *Steinernema carpocapsae*  
924 nematodes. *J Bacteriol*, 190(12), 4121-4128. doi:10.1128/JB.00123-08
- 925 25. **Cowles K. N., Cowles C. E., Richards G. R., Martens E. C., Goodrich-Blair H.** (2007).  
926 The global regulator Lrp contributes to mutualism, pathogenesis and phenotypic  
927 variation in the bacterium *Xenorhabdus nematophila*. *Cell Microbiol*, 9(5), 1311-1323.  
928 doi:10.1111/j.1462-5822.2006.00873.x
- 929 26. **Crawford J. M., Kontnik R., Clardy J.** (2010). Regulating alternative lifestyles in  
930 entomopathogenic bacteria. *Curr Biol*, 20(1), 69-74. doi:10.1016/j.cub.2009.10.059
- 931 27. **da Silva W. J., Pilz-Junior H. L., Heermann R., da Silva O. S.** (2020). The great  
932 potential of entomopathogenic bacteria *Xenorhabdus* and *Photorhabdus* for mosquito  
933 control: a review. *Parasit Vectors*, 13(1), 376. doi:10.1186/s13071-020-04236-6
- 934 28. **De Mets F., Van Melderren L., Gottesman S.** (2019). Regulation of acetate metabolism  
935 and coordination with the TCA cycle via a processed small RNA. *Proc Natl Acad Sci U S*  
936 *A*, 116(3), 1043-1052. doi:10.1073/pnas.1815288116
- 937 29. **Dearth S. P., Castro H. F., Venice F., Tague E. D., Novero M., Bonfante P.,**  
938 **Campagna S. R.** (2018). Metabolome changes are induced in the arbuscular  
939 mycorrhizal fungus *Gigaspora margarita* by germination and by its bacterial  
940 endosymbiont. *Mycorrhiza*, 28(5-6), 421-433. doi:10.1007/s00572-018-0838-8

- 941 30. **Di Martino M. L., Campilongo R., Casalino M., Micheli G., Colonna B., Prosseda G.**  
942 (2013). Polyamines: emerging players in bacteria-host interactions. *Int J Med Microbiol*,  
943 303(8), 484-491. doi:10.1016/j.ijmm.2013.06.008
- 944 31. **Doberenz C., Zorn M., Falke D., Nannemann D., Hunger D., Beyer L., Ihling C. H.,**  
945 **Meiler J., Sinz A., Sawers R. G.** (2014). Pyruvate formate-lyase interacts directly with  
946 the formate channel FocA to regulate formate translocation. *J Mol Biol*, 426(15), 2827-  
947 2839. doi:10.1016/j.jmb.2014.05.023
- 948 32. **Dong Y., Brewer G. J.** (2019). Global Metabolic Shifts in Age and Alzheimer's Disease  
949 Mouse Brains Pivot at NAD<sup>+</sup>/NADH Redox Sites. *J Alzheimers Dis*, 71(1), 119-140.  
950 doi:10.3233/JAD-190408
- 951 33. **Dutky S. R., Robbins W. F., Thompson J. V.** (1967). The demonstration of sterols as  
952 requirements for the growth, development and reproduction of the DD- 136 nematode.  
953 *Nematologica*;13:140.
- 954 34. **Edwards C. B., Copes N., Brito A. G., Canfield J., Bradshaw P. C.** (2013). Malate and  
955 fumarate extend lifespan in *Caenorhabditis elegans*. *PLoS One*, 8(3), e58345.  
956 doi:10.1371/journal.pone.0058345
- 957 35. **Elton C. S.** (1927). *Animal Ecology*. Sidgwick & Jackson, London.
- 958 36. **Gibson K. E., Silhavy T. J.** (1999). The LysR homolog LrhA promotes RpoS  
959 degradation by modulating activity of the response regulator *sprE*. *J Bacteriol*, 181(2),  
960 563-571. Retrieved from <https://www.ncbi.nlm.nih.gov/pubmed/9882671>
- 961 37. **Givaudan A., Baghdiguan S., Lanois A., Boemare N.** (1995). Swarming and  
962 Swimming Changes Concomitant with Phase Variation in *Xenorhabdus nematophilus*.  
963 *Appl Environ Microbiol*, 61(4), 1408-1413. doi:10.1128/AEM.61.4.1408-1413.1995
- 964 38. **Givaudan A., Lanois A.** (2000). *flhDC*, the flagellar master operon of *Xenorhabdus*  
965 *nematophilus*: requirement for motility, lipolysis, extracellular hemolysis, and full  
966 virulence in insects. *J Bacteriol*, 182(1), 107-115. doi:10.1128/jb.182.1.107-115.2000



- 967 39. **Goldstrohm D. A., Pennington J. E., Wells M. A.** (2003). The role of hemolymph  
968 proline as a nitrogen sink during blood meal digestion by the mosquito *Aedes aegypti*. *J*  
969 *Insect Physiol*, 49(2), 115-121. doi:10.1016/s0022-1910(02)00267-6
- 970 40. **Grabau Z. J., Mauldin M. D., Habteweld A., Carter E. T.** (2020). Nematicide efficacy at  
971 managing *Meloidogyne arenaria* and non-target effects on free-living nematodes in  
972 peanut production. *J Nematol*, 52, 1-10. doi:10.21307/jofnem-2020-028
- 973 41. **Hada K., Hirota K., Inanobe A., Kako K., Miyata M., Araoi S., Matsumoto M., Ohta**  
974 **R., Arisawa M., Daitoku H., Hanada T., Fukamizu A.** (2019). Tricarboxylic acid cycle  
975 activity suppresses acetylation of mitochondrial proteins during early embryonic  
976 development in *Caenorhabditis elegans*. *J Biol Chem*, 294(9), 3091-3099.  
977 doi:10.1074/jbc.RA118.004726
- 978 42. **Harris S. J., Shih Y. L., Bentley S. D., Salmond G. P.** (1998). The *hexA* gene of  
979 *Erwinia carotovora* encodes a LysR homologue and regulates motility and the  
980 expression of multiple virulence determinants. *Mol Microbiol*, 28(4), 705-717.  
981 doi:10.1046/j.1365-2958.1998.00825.x
- 982 43. **Henikoff S., Haughn G. W., Calvo J. M., Wallace J. C.** (1988). A large family of  
983 bacterial activator proteins. *Proc Natl Acad Sci U S A*, 85(18), 6602-6606.  
984 doi:10.1073/pnas.85.18.6602
- 985 44. **Herbert E. E., Goodrich-Blair H.** (2007). Friend and foe: the two faces of *Xenorhabdus*  
986 *nematophila*. *Nat Rev Microbiol*, 5(8), 634-646. doi:10.1038/nrmicro1706
- 987 45. **Heroven A. K., Dersch P.** (2006). RovM, a novel LysR-type regulator of the virulence  
988 activator gene *rovA*, controls cell invasion, virulence and motility of *Yersinia*  
989 *pseudotuberculosis*. *Mol Microbiol*, 62(5), 1469-1483. doi:10.1111/j.1365-  
990 2958.2006.05458.x

- 991 46. **Hussa E. A., Casanova-Torres A. M., Goodrich-Blair H.** (2015). The global  
992 transcription factor Lrp controls virulence modulation in *Xenorhabdus nematophila*. *J*  
993 *Bacteriol*; 197:3015-3025.
- 994 47. **Joyce S. A., Clarke D. J.** (2003). A *hexA* homologue from *Photorhabdus* regulates  
995 pathogenicity, symbiosis and phenotypic variation. *Mol Microbiol*, 47(5), 1445-1457.  
996 doi:10.1046/j.1365-2958.2003.03389.x
- 997 48. **Kanehisa M., Sato Y., Morishima K.** (2016) BlastKOALA and GhostKOALA: KEGG  
998 tools for functional characterization of genome and metagenome sequences. *J. Mol.*  
999 *Biol.* 428, 726-731.
- 1000 49. **Kanehisa M., Furumichi M., Tanabe M., Sato Y., Morishima K.** (2017). KEGG: new  
1001 perspectives on genomes, pathways, diseases and drugs. *Nucleic Acids Res*, 45(D1),  
1002 D353-D361. doi:10.1093/nar/gkw1092
- 1003 50. **Katsyuba E., Mottis A., Zietak M., De Franco F., van der Velpen V., Gariani K., Ryu**  
1004 **D., Cialabrini L., Matilainen O., Liscio P., Giacchè N., Stokar-Regenscheit N.,**  
1005 **Legouis D., de Seigneux S., Ivanisevic J., Raffaelli N., Schoonjans K., Pellicciari R.,**  
1006 **Auwerx J.** (2018). De novo NAD<sup>+</sup> synthesis enhances mitochondrial function and  
1007 improves health. *Nature*. 563(7731):354-359. doi: 10.1038/s41586-018-0645-6. PMID:  
1008 30356218; PMCID: PMC6448761.
- 1009 51. **Killiny N.** (2018). Generous hosts: Why the larvae of greater wax moth, *Galleria*  
1010 *mellonella* is a perfect infectious host model? *Virulence*, 9(1), 860-865.  
1011 doi:10.1080/21505594.2018.1454172
- 1012 52. **Lacey L. A., Georgis, R.** (2012). Entomopathogenic nematodes for control of insect  
1013 pests above and below ground with comments on commercial production. *J Nematol*,  
1014 44(2), 218-225. Retrieved from <https://www.ncbi.nlm.nih.gov/pubmed/23482993>

- 1015 53. **Latham J. A., Chen D., Allen K. N., Dunaway-Mariano D.** (2014). Divergence of  
1016 substrate specificity and function in the *Escherichia coli* hotdog-fold thioesterase  
1017 paralogs Ydil and YbdB. *Biochemistry*, 53(29), 4775-4787. doi:10.1021/bi500333m
- 1018 54. **Lehnen D., Blumer C., Polen T., Wackwitz B., Wendisch V. F., Uden G.** (2002).  
1019 LrhA as a new transcriptional key regulator of flagella, motility and chemotaxis genes in  
1020 *Escherichia coli*. *Mol Microbiol*, 45(2), 521-532. doi:10.1046/j.1365-2958.2002.03032.x
- 1021 55. **Lee Y., Jeong H., Park K. H., Kim K. W.** (2020). Effects of NAD(+) in *Caenorhabditis*  
1022 *elegans* Models of Neuronal Damage. *Biomolecules*, 10(7). doi:10.3390/biom10070993
- 1023 56. **Lindeman R.L.** (1942). The trophic-dynamic aspect of ecology. *Ecology*, 23, pp. 399-  
1024 417
- 1025 57. **Javal M., Terblanche J. S., Conlong D. E., Malan, A. P.** (2019). First Screening of  
1026 Entomopathogenic Nematodes and Fungus as Biocontrol Agents against an Emerging  
1027 Pest of Sugarcane, *Cacosceles newmannii* (Coleoptera: Cerambycidae). *Insects*, 10(4).  
1028 doi:10.3390/insects10040117
- 1029 58. **Jing X., Behmer S. T.** (2020). Insect Sterol Nutrition: Physiological Mechanisms,  
1030 Ecology, and Applications. *Annu Rev Entomol*, 65, 251-271. doi:10.1146/annurev-ento-  
1031 011019-025017
- 1032 59. **Lu W., Clasquin M. F., Melamud E., Amador-Noguez D., Caudy A. A., Rabinowitz J.**  
1033 **D.** (2010). Metabolomic analysis via reversed-phase ion-pairing liquid chromatography  
1034 coupled to a stand alone orbitrap mass spectrometer. *Anal Chem*, 82(8), 3212-3221.  
1035 doi:10.1021/ac902837x
- 1036 60. **Lu X., Goodrich-Blair H., Tjaden B.** (2011). Assessing computational tools for the  
1037 discovery of small RNA genes in bacteria. *RNA*; 17:1635-1647.
- 1038 61. **Lu X.** (2012). Examining Pathogenic and Mutualistic Regulatory Networks in the  
1039 Bacterium *Xenorhabdus nematophila*. Ph.D. thesis, UW-Madison

- 1040 62. **Maddocks S. E., Oyston P. C. F.** (2008). Structure and function of the LysR-type  
1041 transcriptional regulator (LTTR) family proteins. *Microbiology*, 154(Pt 12), 3609-3623.  
1042 doi:10.1099/mic.0.2008/022772-0
- 1043 63. **Mak H. Y.** (2012) Lipid droplets as fat storage organelles in *Caenorhabditis elegans*:  
1044 thematic review series: lipid droplet synthesis and metabolism: from yeast to man. *J*  
1045 *Lipid Res.*;53(1):28–33.
- 1046 64. **Maloy S. R., Nunn W. D.** (1982). Genetic regulation of the glyoxylate shunt in  
1047 *Escherichia coli* K-12. *J Bacteriol*, 149(1), 173-180. Retrieved from  
1048 <https://www.ncbi.nlm.nih.gov/pubmed/7033207>
- 1049 65. **Margulis L.** (1981). *Symbiosis in cell evolution: life and its environment on the early*  
1050 *Earth*. San Francisco: W. H. Freeman.
- 1051 66. **Martens E. C., Vivas E. I., Heungens K., Cowles C. E., Goodrich-Blair H.** (2004)  
1052 Investigating mutualism between entomopathogenic bacteria and nematodes. *Nematol.*  
1053 *Monographs Persp.* 2, 447–462
- 1054 67. **Martens E. C., Russell F. M., Goodrich-Blair H.** (2005). Analysis of *Xenorhabdus*  
1055 *nematophila* metabolic mutants yields insight into stages of *Steinernema carpocapsae*  
1056 nematode intestinal colonization. *Mol Microbiol*, 58(1), 28-45. doi:10.1111/j.1365-  
1057 2958.2005.04742.x
- 1058 68. **Martino G. P., Perez C. E., Magni C., Blancato V. S.** (2018). Implications of the  
1059 expression of *Enterococcus faecalis* citrate fermentation genes during infection. *PLoS*  
1060 *One*, 13(10), e0205787. doi:10.1371/journal.pone.0205787
- 1061 69. **May J. M., Qu Z. C., Meredith M. E.** (2012). Mechanisms of ascorbic acid stimulation of  
1062 norepinephrine synthesis in neuronal cells. *Biochem Biophys Res Commun*, 426(1),  
1063 148-152. doi:10.1016/j.bbrc.2012.08.054

- 1064 70. **McMullen J. G. 2<sup>nd</sup>, Stock S. P.** (2014). *In vivo* and *in vitro* rearing of entomopathogenic  
1065 nematodes (*Steinernematidae* and *Heterorhabditidae*). *J Vis Exp*, (91), 52096.  
1066 doi:10.3791/52096
- 1067 71. **Melamud E., Vastag L., Rabinowitz J. D.** (2010). Metabolomic analysis and  
1068 visualization engine for LC-MS data. *Anal Chem*, 82(23), 9818-9826.  
1069 doi:10.1021/ac1021166
- 1070 72. **O'Riordan V. B., Burnell A. M.** (1989) Intermediary metabolism in the dauer larva of the  
1071 nematode *Caenorhabditis elegans*— 1. Glycolysis, gluconeogenesis, oxidative  
1072 phosphorylation and the tricarboxylic acid cycle. *Comp Biochem Physiol B*;92(2):233–8.
- 1073 73. **Ohkouchi N., Chikaraishi Y., Close H. G., Fry B., Larsen T., Madigan D. J.,  
1074 McCarthy M. D., McMahon K. W., Nagata T., Naito Y. I., Ogawa N. O., Popp B. N.,  
1075 Steffan S., Takano Y., Tayasu I., Wyatt A. S. J., Yamaguchi Y. T., Yokoyama Y.**  
1076 (2017). Advances in the application of amino acid nitrogen isotopic analysis in ecological  
1077 and biogeochemical studies. *Organic Geochemistry*, Volume 113, 150-174.  
1078 <https://doi.org/10.1016/j.orggeochem.2017.07.009>.
- 1079 74. **Orchard S. S., Goodrich-Blair H.** (2005). Pyrimidine nucleoside salvage confers an  
1080 advantage to *Xenorhabdus nematophila* in its host interactions. *Appl Environ Microbiol*,  
1081 71(10), 6254-6259. doi:10.1128/AEM.71.10.6254-6259.2005
- 1082 75. **Park S. J., Tseng C. P., Gunsalus R. P.** (1995). Regulation of succinate  
1083 dehydrogenase (*sdhCDAB*) operon expression in *Escherichia coli* in response to carbon  
1084 supply and anaerobiosis: role of ArcA and Fnr. *Mol Microbiol*, 15(3), 473-482.  
1085 doi:10.1111/j.1365-2958.1995.tb02261.x
- 1086 76. **Perinbam K., Chacko J. V., Kannan A., Digman M. A., Siryaporn A.** (2020). A Shift in  
1087 Central Metabolism Accompanies Virulence Activation in *Pseudomonas aeruginosa*.  
1088 *mBio*, 11(2). doi:10.1128/mBio.02730-18

- 1089 77. **Peterson C. N., Carabetta V. J., Chowdhury T., Silhavy T. J.** (2006). LrhA regulates  
1090 *rpoS* translation in response to the Rcs phosphorelay system in *Escherichia coli*. *J*  
1091 *Bacteriol*, 188(9), 3175-3181. doi:10.1128/JB.188.9.3175-3181.2006
- 1092 78. **Phelan V. V., Moree W. J., Aguilar J., Cornett D. S., Koumoutsis A., Noble S. M.,**  
1093 **Pogliano K., Guerrero C. A., Dorrestein P. C.** (2014). Impact of a transposon insertion  
1094 in *phzF2* on the specialized metabolite production and interkingdom interactions of  
1095 *Pseudomonas aeruginosa*. *J Bacteriol*, 196(9), 1683-1693. doi:10.1128/JB.01258-13
- 1096 79. **Rahman M. M., Rosu S., Joseph-Strauss D., Cohen-Fix O.** (2014). Down-regulation of  
1097 tricarboxylic acid (TCA) cycle genes blocks progression through the first mitotic division  
1098 in *Caenorhabditis elegans* embryos. *Proc Natl Acad Sci U S A*, 111(7), 2602-2607.  
1099 doi:10.1073/pnas.1311635111
- 1100 80. **Ramarao N., Nielsen-Leroux C., Lereclus D.** (2012). The insect *Galleria mellonella* as  
1101 a powerful infection model to investigate bacterial pathogenesis. *J Vis Exp*(70), e4392.  
1102 doi:10.3791/4392
- 1103 81. **Raymond K. N., Dertz E. A., Kim S. S.** (2003). Enterobactin: an archetype for microbial  
1104 iron transport. *Proc Natl Acad Sci U S A*, 100(7), 3584-3588.  
1105 doi:10.1073/pnas.0630018100
- 1106 82. **Ren J., Sang Y., Lu J., Yao Y. F.** (2017). Protein Acetylation and Its Role in Bacterial  
1107 Virulence. *Trends Microbiol*, 25(9), 768-779. doi:10.1016/j.tim.2017.04.001
- 1108 83. **Richards G. R., Goodrich-Blair H.** (2009). Masters of conquest and pillage:  
1109 *Xenorhabdus nematophila* global regulators control transitions from virulence to nutrient  
1110 acquisition. *Cell Microbiol*, 11(7), 1025-1033. doi:10.1111/j.1462-5822.2009.01322.x
- 1111 84. **Richards G. R., Herbert E. E., Park Y., Goodrich-Blair, H.** (2008). *Xenorhabdus*  
1112 *nematophila* *lrhA* is necessary for motility, lipase activity, toxin expression, and virulence  
1113 in *Manduca sexta* insects. *J Bacteriol*, 190(14), 4870-4879. doi:10.1128/JB.00358-08

- 1114 85. Rougon-Cardoso A., Flores-Ponce M., Ramos-Aboites H. E., Martínez-Guerrero C.  
1115 E., Hao Y. J., Cunha L., Rodríguez-Martínez J. A., Ovando-Vázquez C., Bermúdez-  
1116 Barrientos J. R., Abreu-Goodger C., Chavarría-Hernández N., Simões N., Montiel R.  
1117 (2016). The genome, transcriptome, and proteome of the nematode *Steinernema*  
1118 *carpocapsae*: evolutionary signatures of a pathogenic lifestyle. *Sci Rep*, 6, 37536.  
1119 doi:10.1038/srep37536
- 1120 86. Shah P., Swiatlo E. (2008). A multifaceted role for polyamines in bacterial pathogens.  
1121 *Mol Microbiol*, 68(1), 4-16. doi:10.1111/j.1365-2958.2008.06126.x
- 1122 87. Shi Y., Wang H., Yan Y., Cao H., Liu X., Lin F., Lu J. (2018). Glycerol-3-Phosphate  
1123 Shuttle Is Involved in Development and Virulence in the Rice Blast Fungus *Pyricularia*  
1124 *oryzae*. *Front Plant Sci*, 9, 687. doi:10.3389/fpls.2018.00687
- 1125 88. Stahlschmidt Z., Acker M., Kovalko I., Adamo S. (2015). The double-edged sword of  
1126 immune defence and damage control: Do food availability and immune challenge alter  
1127 the balance? *Functional Ecology*. 29. 10.1111/1365-2435.12454.
- 1128 89. Steffan S. A., Chikaraishi Y., Horton D. R., Ohkouchi N., Singleton M. E., Miliczky  
1129 E., Hogg D. B., Jones V. P. (2013). Trophic hierarchies illuminated via amino acid  
1130 isotopic analysis. *PLoS One*, 8(9), e76152. doi:10.1371/journal.pone.0076152
- 1131 90. Steffan S. A., Chikaraishi Y., Currie C. R., Horn H., Gaines-Day H. R., Pauli J. N.,  
1132 Zalapa J. E., Ohkouchi N. (2015). Microbes are trophic analogs of animals. *Proc Natl*  
1133 *Acad Sci U S A*, 112(49), 15119-15124. doi:10.1073/pnas.1508782112
- 1134 91. Steffan S. A., Chikaraishi Y., Dharampal P. S., Pauli J. N., Guedot C., Ohkouchi N.  
1135 (2017). Unpacking brown food-webs: Animal trophic identity reflects rampant  
1136 microbivory. *Ecol Evol*, 7(10), 3532-3541. doi:10.1002/ece3.2951
- 1137 92. Steffan S. A., Dharampal P. S. (2019). Undead food-webs: Integrating microbes into  
1138 the food-chain. *Food Webs*, 18, e00111. <https://doi.org/10.1016/j.fooweb.2018.e00111>



- 1139 93. **Stock S. P.** (2019). Partners in crime: symbiont-assisted resource acquisition in  
1140 *Steinernema* entomopathogenic nematodes. *Curr Opin Insect Sci*, 32, 22-27.  
1141 doi:10.1016/j.cois.2018.10.006
- 1142 94. **Szklarczyk D., Gable A. L., Lyon D., Junge A., Wyder S., Huerta-Cepas J.,**  
1143 **Simonovic M., Doncheva N. T., Morris J. H., Bork P., Jensen L. J., Mering C. V.**  
1144 (2019). STRING v11: protein-protein association networks with increased coverage,  
1145 supporting functional discovery in genome-wide experimental datasets. *Nucleic Acids*  
1146 *Res*, 47(D1), D607-D613. doi:10.1093/nar/gky1131
- 1147 95. **Takizawa Y., Takano Y., Choi B., Dharampal P. S., Steffan S. A., Ogawa N. O.,**  
1148 **Ohkouchi N., Chikaraishi Y.** (2020). A new insight into isotopic fractionation associated  
1149 with decarboxylation in organisms: implications for amino acid isotope approaches in  
1150 biogeoscience. *Prog Earth Planet Sci* 7, 50. <https://doi.org/10.1186/s40645-020-00364-w>
- 1151 96. **Tang H., Pang S.** (2016). Proline Catabolism Modulates Innate Immunity in  
1152 *Caenorhabditis elegans*. *Cell Rep*, 17(11), 2837-2844. doi:10.1016/j.celrep.2016.11.038
- 1153 97. **Tang J.** (2011). Microbial metabolomics. *Curr Genomics*, 12(6), 391-403.  
1154 doi:10.2174/138920211797248619
- 1155 98. **Teulier L., Weber J. M., Crevier J., Darveau C. A.** (2016). Proline as a fuel for insect  
1156 flight: enhancing carbohydrate oxidation in hymenopterans. *Proc Biol Sci*, 283(1834).  
1157 doi:10.1098/rspb.2016.0333
- 1158 99. **Tsai C. J., Loh J. M., Proft T.** (2016). *Galleria mellonella* infection models for the study  
1159 of bacterial diseases and for antimicrobial drug testing. *Virulence*, 7(3), 214-229.  
1160 doi:10.1080/21505594.2015.1135289
- 1161 100. **Vallenet D., Labarre L., Rouy Z., Barbe V., Bocs S., Cruveiller S., Lajus A.,**  
1162 **Pascal G., Scarpelli C., Médigue C.** (2006). MaGe: a microbial genome annotation  
1163 system supported by synteny results. *Nucleic Acids Res*, 34(1), 53-65.  
1164 doi:10.1093/nar/gkj406

- 1165 101. **Vivas E.I., Goodrich-Blair H.** (2001) *Xenorhabdus nematophilus* as a model for  
1166 host-bacterium interactions: rpoS is necessary for mutualism with nematodes. *Journal of*  
1167 *Bacteriology*, 183:4687-4693.
- 1168 102. **Volgyi A, Fodor A, Szentirmai A, Forst S.** (1998). Phase Variation in  
1169 *Xenorhabdus nematophilus*. *Appl Environ Microbiol.*;64(4):1188-93. doi:  
1170 10.1128/AEM.64.4.1188-1193. PMID: 16349534
- 1171 103. **Wang J., Dong Y., Zhou T., Liu X., Deng Y., Wang C., Lee J., Zhang L. H.**  
1172 (2013) *Pseudomonas aeruginosa* cytotoxicity is attenuated at high cell density and  
1173 associated with the accumulation of phenylacetic acid. *PLoS One.*;8(3):e60187.  
1174 doi:10.1371/journal.pone.0060187
- 1175 104. **Watford M.** (2008). Glutamine metabolism and function in relation to proline  
1176 synthesis and the safety of glutamine and proline supplementation. *J Nutr*, 138(10),  
1177 2003S-2007S. doi:10.1093/jn/138.10.2003S
- 1178 105. **Worthington R. J., Richards J. J., Melander C.** (2012). Small molecule control  
1179 of bacterial biofilms. *Org Biomol Chem*, 10(37), 7457-7474. doi:10.1039/c2ob25835h
- 1180 106. **Yokoyama K., Ishijima S. A., Clowney L., Koike H., Aramaki H., Tanaka C.,**  
1181 **Makino K., Suzuki M.** (2006). Feast/famine regulatory proteins (FFRPs): *Escherichia*  
1182 *coli* Lrp, AsnC and related archaeal transcription factors. *FEMS Microbiol Rev*, 30(1), 89-  
1183 108. doi:10.1111/j.1574-6976.2005.00005.x
- 1184 107. **You D., Yao L. L., Huang D., Escalante-Semerena J. C., Ye B. C.** (2014).  
1185 Acetyl coenzyme A synthetase is acetylated on multiple lysine residues by a protein  
1186 acetyltransferase with a single Gcn5-type N-acetyltransferase (GNAT) domain in  
1187 *Saccharopolyspora erythraea*. *J Bacteriol.*;196(17):3169-3178. doi:10.1128/JB.01961-14
- 1188 108. **Zečić A., Dhondt I., Braeckman B.P.** (2019). The nutritional requirements of  
1189 *Caenorhabditis elegans*. *Genes Nutr* 14, 15 (2019). [https://doi.org/10.1186/s12263-019-](https://doi.org/10.1186/s12263-019-0637-7)  
1190 0637-7

- 1191 109. **Zelcbuch L., Lindner S. N., Zegman Y., Vainberg Slutskin I., Antonovsky N.,**  
1192 **Gleizer S., Milo R., Bar-Even A.** (2016). Pyruvate Formate-Lyase Enables Efficient  
1193 Growth of *Escherichia coli* on Acetate and Formate. *Biochemistry*, 55(17), 2423-2426.  
1194 doi:10.1021/acs.biochem.6b00184
- 1195 110. **Zheng R., Feng X., Wei X., Pan X., Liu C., Song R., Jin Y., Bai F., Jin S., Wu**  
1196 **Wu., Cheng Z.** (2018). PutA Is Required for Virulence and Regulated by PruR in  
1197 *Pseudomonas aeruginosa*. *Front Microbiol*, 9, 548. doi:10.3389/fmicb.2018.00548  
1198

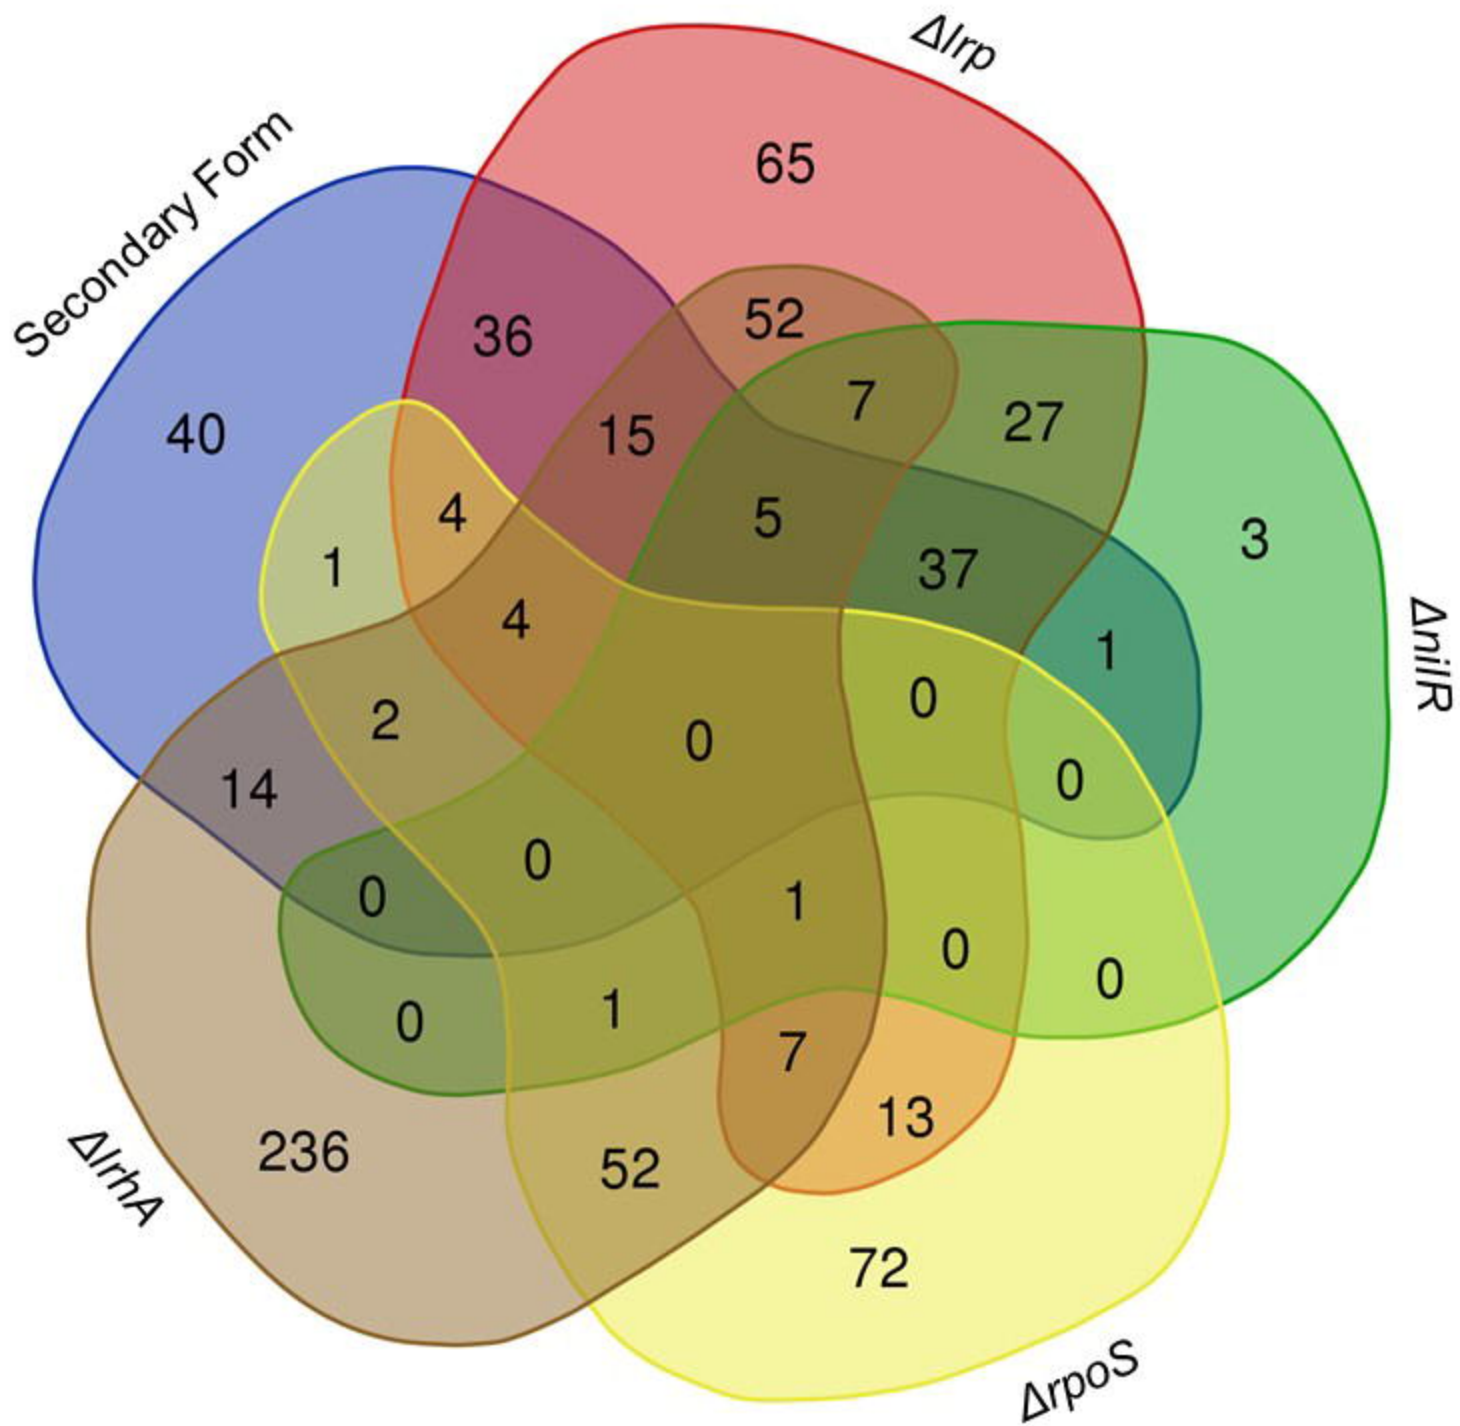

Supplementary Figure 1: Venn diagram comparing the differentially expressed transcripts between the 5 microarrays. Visualization provided from: <http://bioinformatics.psb.ugent.be/webtools/Venn/>

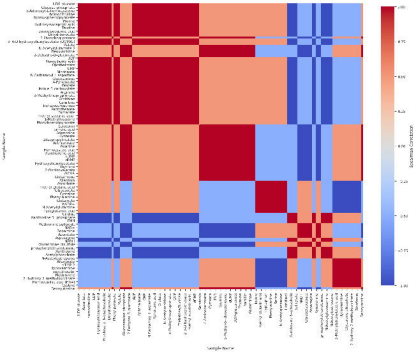

Source: https://www.biorxiv.org/content/10.1101/2021.02.13.430781v1.full.pdf
