# Chemical ecology of an apex predator life cycle

Nicholas C. Mucci<sup>1</sup>, Katarina A. Jones<sup>2</sup>, Mengyi Cao<sup>3</sup>, Michael R. Wyatt II<sup>4</sup>, Shane Foye<sup>5</sup>, Sarah Kauffman<sup>1</sup>, Michela Tauffer<sup>4</sup>, Yoshito Chikaraishi<sup>6</sup>, Shawn Steffan<sup>5,7</sup>, Shawn Campagna<sup>2,8</sup>, Heidi Goodrich-Blair<sup>1,3#</sup>

<sup>1</sup>Department of Microbiology, University of Tennessee-Knoxville, Knoxville, TN 37996, USA.

<sup>2</sup>Department of Chemistry, University of Tennessee-Knoxville, Knoxville, TN 37996, USA.

<sup>3</sup>Department of Bacteriology, University of Wisconsin-Madison, Madison, WI 53706, USA.

<sup>4</sup>Department of Electrical Engineering and Computer Science, University of Tennessee- Knoxville, Knoxville, TN 37996, USA.

<sup>5</sup>Department of Entomology, University of Wisconsin-Madison, Madison, WI 53706, USA.

<sup>6</sup>Department of Biogeochemistry, Japan Agency for Marine-Earth Science and Technology, Yokosuka 237-0061, Japan.

<sup>7</sup>US Department of Agriculture, Agricultural Research Service, Madison, WI 53706, USA.

<sup>8</sup>Biological and Small Molecule Mass Spectrometry Core, University of Tennessee-Knoxville, Knoxville, TN 37996, USA.

#Corresponding author: Heidi Goodrich-Blair, hgblair@utk.edu

## Abstract

Microbial symbiotic interactions, mediated by small molecule signaling, drive physiological processes of higher order systems. Metabolic analytic technologies advancements provide new avenues to examine how chemical ecology, or conversion of existing biomass to new forms, changes over a symbiotic lifecycle. We examine such processes using the tripartite relationship between nematode host *Steinernema carpocapsae*, its obligate mutualist bacterium, *Xenorhabdus nematophila*, and the insects they infect together. We integrate trophic, metabolomics, and gene regulation analyses to understand insect biomass conversion to nematode or bacterium biomass. Trophic analysis established bacteria as the primary insect consumers, with nematodes at trophic position 4.37, indicating consumption of bacteria and likely other nematodes. Significant, discrete metabolic phases were distinguishable from each other, indicating the insect chemical environment changes reproducibly during bioconversion. Tricarboxylic acid cycle components and amino acids were significantly affected throughout infection. These findings contribute to an ongoing understanding of how symbiont associations shape chemical environments.

32 **Teaser**

33 Entomopathogenic nematodes act as an apex predator in some ecosystems through altering  
34 chemical environments of their prey.

35  
36 **MAIN TEXT**

37  
38 **Introduction**

39 Symbiotic interactions are ubiquitous in biological systems and have shaped the evolution of life (1). These  
40 long-term, intimate associations are driven by small molecule signaling between partners. Bacterial populations  
41 establish diverse and expansive metabolite-mediated signaling networks that control gene expression and downstream  
42 behaviors, such as biofilm formation and the production of host-interacting effectors (2-4). A common mechanism by  
43 which bacteria sense and transduce metabolic signals is through transcription factors whose DNA binding affinity or  
44 specificity is modulated by binding metabolite ligands. For instance, LysR-type transcription factors, which are  
45 conserved across proteobacteria, are characterized by a conserved *N*-terminal DNA-binding domain and a *C*-terminal  
46 domain that varies among LysR-type regulator homologs. The latter domain is responsible for ligand metabolite  
47 binding and dictates the response specificity of the transcription factor (5, 6). In a range of bacteria, LysR-type  
48 regulators modulate various phenotypes, including virulence, nutrient uptake and metabolic homeostasis, motility,  
49 quorum sensing, and antibiotic resistance (7). Another diverse family of transcription factors, feast/famine regulatory  
50 factors like leucine-responsive regulatory protein (Lrp), will bind and dimerize with amino acids in response to  
51 nutrient levels and globally induce transcriptional changes (8).

52 Given the key function of metabolites in communicating information about intracellular and extracellular  
53 environmental conditions, examining their identities and abundances is critical to understanding biological systems.  
54 Metabolomics has enabled such studies and has been used to detect specific small molecules that drive essential  
55 cellular processes and inter-kingdom signaling (9, 10). Further, it is being applied to more complex ecosystems  
56 comprising multi-species microbiota colonizing a host (11). However, to date such studies have been primarily  
57 focused on binary conditional comparisons between treatments, or on single, snapshot sampling of complex  
58 interactions. Here, to gain insights temporal changes in metabolic pathways that occur in complex ecosystems, a  
59 longitudinal analysis of metabolic profiles was conducted in closed ecosystem in which biomass is being  
60 reproducibly converted from one type of living organism to another. The closed ecosystem comprised an individual  
61 insect infected with an entomopathogenic nematode (EPN) and bacterium (EPNB) pair.

62 EPNs of the genera *Steinernema* and *Heterorhabditis* associate with mutualistic bacteria in the genera  
63 *Xenorhabdus* and *Photorhabdus*, respectively. An infective juvenile (IJ) stage of EPN carry their mutualistic bacteria

64 in their intestine as they dwell in the soil seeking insect hosts to infect. Upon infection, the bacteria are released into  
65 the insect blood cavity and together the nematode and bacterium kill and consume the insect for their own  
66 reproduction before developing into the bacteria-colonized infective stage again to repeat the cycle (12, 13). EPNBs  
67 have been applied as insecticide alternatives to promote agricultural productivity and to help prevent transmission of  
68 insect diseases like dengue and West Nile virus (14, 15).

69 In this study, consumption and bioconversion of the insect *Galleria mellonella* by the EPN *Steinernema*  
70 *carpocapsae* and its mutualistic bacterial symbiont, *Xenorhabdus nematophila* was examined from a metabolic  
71 perspective. *G. mellonella* is used for laboratory isolation and propagation of EPNB, is a model host to understand  
72 virulence of a variety of microbial pathogens and has a characterized metabolome (16). The *S. carpocapsae*-*X.*  
73 *nematophila* pair was chosen due to the wealth of information available about them from molecular, cellular, and  
74 genetic studies (13). For example, it is known that *X. nematophila* bacterial effectors and natural products suppress  
75 insect immunity, kill insect blood cells, degrade insect tissues, and defend the insect cadaver from opportunistic  
76 competitors (17). Also, *X. nematophila* bacteria are essential for *S. carpocapsae* reproduction; in the absence of  
77 bacteria fewer nematode IJs emerge from insect cadavers after reproduction (18). Expression of effectors and  
78 physiological adaptation to changing host environments is controlled in *X. nematophila* by transcriptional regulators  
79 that are predicted to sense and respond to prevailing metabolic conditions (19). For instance, the LysR-type regulator  
80 LrhA that is necessary for *X. nematophila* virulence and controls expression of an extracellular phospholipase that is  
81 necessary for insect degradation (12, 19, 20), the sigma factor RpoS that is necessary for colonizing the IJ stage of the  
82 nematode (21), the two-component system CpxRA, and the leucine-responsive regulatory protein Lrp, both of which  
83 are necessary for normal virulence and mutualism behaviors (17, 22, 23), NilR, a lambda like repressor family  
84 transcription factor that negatively regulates genes necessary for nematode colonization (24) and the two-component  
85 system OmpR/EnvZ that negatively controls *X. nematophila* swarming motility behavior and exoenzyme production  
86 (25). Further, *X. nematophila* displays phenotypic heterogeneity with respect to behaviors important for adaptation to  
87 host environments. For instance, “primary form” [1°] *X. nematophila* can be distinguished from “secondary form”  
88 [2°] by its motility, antibiotic and natural products secretion, and hemolytic and lipolytic activities and additional  
89 phenotypic variants arise over the course of insect infection (26, 27).

90 The goal of this study was to begin to understand the overall metabolic transformations, or bioconversion  
91 processes occurring within a closed yet complex biological ecosystem. <sup>15</sup>N isotopic enrichment analyses were  
92 performed to establish the relative trophic positions of the insect, *G. mellonella*, the nematode, *S. carpocapsae*, and  
93 the bacterium, *X. nematophila*, so that the relative roles in bioconversion of each ecosystem member could be

94 established. Then, a metabolomics analysis using an ultra-high performance liquid chromatography high-resolution  
95 mass spectrometry (UHPLC-HRMS) metabolomics technique was conducted over a 16-day time course after *S.*  
96 *carpocapsae-X. nematophila* infection of *G. mellonella*, encompassing a complete bioconversion of insect tissues to  
97 the bacterial-colonized progeny IJs that emerged from the insect.

## 98 99 **Results**

### 100 **Trophic analysis reveals *S. carpocapsae* nematodes directly feed on *X. nematophila* bacteria:**

101 The trophic identities of the entomopathogenic nematode (*Steinernema carpocapsae*), its bacterial symbiont  
102 (*Xenorhabdus nematophila*), and their host insect were measured empirically based on <sup>15</sup>N isotopic enrichment of  
103 amino acids (Table 1 and Data S1). To this end, it was first necessary to establish that the degree of <sup>15</sup>N-enrichment  
104 between the consumers (nematodes, bacteria) and their respective diets (e.g., agar growth media, bacteria, or the  
105 insect) was consistent with past studies of inter-trophic enrichment (Supplementary Text). These findings allowed for  
106 the subsequent *in vivo* trials involving insect cadavers (Fig. 1B, Table 1 and Data S1). As reported above, the mean  
107 TP<sub>glu-phe</sub> of an uncolonized insect cadaver was  $2.2 \pm 0.02$  ( $N = 6$ ). When the insect was colonized by bacteria alone,  
108 the TP<sub>glu-phe</sub> of the insect-bacteria complex was  $2.5 \pm 0.03$  ( $N = 3$ ). This complex represented the blending of  
109 consumer and diet (as described in 28), wherein the consumer (i.e., the *Xenorhabdus* bacterial population) was  
110 suffused within and throughout its diet (the insect cadaver). Given that both the bacterial and insect biomass were  
111 available within the cadaver, this established the basis for the question as to what a developing nematode would  
112 consume/assimilate within the cadaver. The diet of the nematodes (i.e., the insect-bacterial complex) was measured at  
113  $\sim 2.5$ , thus if the nematodes within the cadaver fed randomly on all available substrates, the nematode TP<sub>glu-phe</sub> would  
114 be expected to be  $\sim 3.5$  (i.e.,  $\sim 2.5 + 1.0$ ). However, the infective juveniles emerging from the cadavers registered a  
115 TP<sub>glu-phe</sub> of  $4.6 \pm 0.08$  ( $N = 5$ ), a full trophic level higher than expected.

116 The data above demonstrated that adult *Steinernema* nematodes consume their mutualistic bacteria. During  
117 this stage, *Xenorhabdus* bacteria colonize the anterior intestinal caecum. To determine if this colonization influences  
118 the ability of *Steinernema* nematodes to consume *Xenorhabdus*, the TP<sub>glu-phe</sub> of adult *Steinernema* cultivated on lawns  
119 of either wild-type *Xenorhabdus*, or a non-colonizing mutant ( $\Delta SRI$ ) was assessed (29). Nematodes had the same  
120 TP<sub>glu-phe</sub> regardless of the colonization proficiency of the bacterial diet, indicating that colonization is not required for  
121 nematode direct feeding on its symbiotic bacteria (Data S1).

### 122 ***X. nematophila* transcriptional control of metabolic pathways**

123 The trophic analyses described above establish *X. nematophila* bacteria as the linchpin organism in the  
124 closed ecosystem, responsible for direct consumption of the insect tissue and serving as a primary food source for its

125 mutualistic host *S. carpocapsae*. To gain insights into the metabolic pathways utilized by *X. nematophila* in  
126 performance of these functions, the global regulons of several transcription factors was determined using an  
127 exploratory microarray analysis, portions of which have been reported elsewhere (Fig. 2 and Table S1, and Data S2)  
128 (30-32). Microarray analyses were conducted on mutants lacking genes encoding the transcription factors LrhA,  
129 RpoS, NilR, and Lrp, each of which has a defect in one or more aspects of the *X. nematophila* life cycle (19, 21, 23,  
130 24). In addition, since the primary to secondary form phenotypic variation globally influences host-interaction  
131 phenotypes, the transcriptional profiles of these variants were examined from a metabolic perspective. The mutant  
132 and secondary form cells were each compared to their wild-type parent or primary form, respectively, using a  $2\text{-}|\log_{10}(\text{fold change})|$   
133 significance cutoff for differences in transcript levels.

134 The number of differential transcripts are a fraction of the 3733 averaged total expressed chromosome ORFs  
135 among the strains. The number of genes with differential transcript abundance in mutant/secondary form compared to  
136 wild-type/primary was highest in  $\Delta lrhA$  at 396 genes (10.6%), followed by  $\Delta lrp$ , secondary form,  $\Delta rpoS$ , and  $\Delta nilR$   
137 with 273 (7.3%), 159 (4.3%), 157 (4.2%), and 83 (2.2%) differentially abundant transcripts, respectively (Fig. 2A).  
138 The proportion of genes categorized as being involved in metabolic activity varied amongst the strains. Through  
139 KEGG annotation, the highest proportion of differentially expressed genes categorized as metabolic was observed in  
140 the  $\Delta rpoS$  strain, at 38.9%, with  $\Delta lrhA$ ,  $\Delta lrp$ , secondary form, and  $\Delta nilR$  having metabolic-related activities at 18.9%,  
141 13.6%, 10.7%, and 9.8%, of the differentially expressed genes in the respective strain. Differential transcript overlap  
142 was observed while comparing the 5 strains (Fig. S1). The largest overlap between 2 strains was for the secondary  
143 form and  $\Delta lrp$  mutant, consisting of mostly amino acid (*xncB*, the aminotransferase XNC1\_2154) and lipid  
144 biosynthesis (*fabG*, *xncL*) genes. *X. nematophila* lacking *lrp* are phenotypically secondary form (23). Another large  
145 overlap was observed between  $\Delta lrp$  and  $\Delta nilR$ , which synergistically repress nematode colonization (24). The overlap  
146 regulation includes the phosphotransferase system/ascorbate metabolic (XNC1\_2826-2828) genes and prokaryotic  
147 defense system genes (XNC1\_3717-3719, 3724, and 3931).

148 Functional analysis of the differentially expressed metabolic transcripts was performed through KEGG  
149 annotation using BlastKOALA (KEGG Orthology and Links Annotation). Sequences were aligned against a  
150 nonredundant set of prokaryotic KEGG genes using BLAST searches (33). Consistent with the KEGG annotation  
151 analysis noted above, of the strains tested  $\Delta rpoS$ ,  $\Delta lrhA$ ,  $\Delta lrp$  were the most strongly impacted with respect to  
152 metabolic pathway transcripts. These three strains displayed differences in carbohydrate and amino acid metabolic  
153 regulation (Fig. 2A). Branches of carbohydrate metabolism, like propanoate, pentose and glucuronate, and glyoxylate  
154 metabolism were impacted by the  $\Delta lrhA$  and  $\Delta rpoS$  mutations (Fig. 2B). Inositol phosphate metabolism was

155 impacted in  $\Delta rpoS$  and  $\Delta lrp$  strains, while pyruvate metabolism was impacted in the  $\Delta lrhA$  strain. Butanoate  
156 metabolism, a branch of carbohydrate metabolism where the amino acid ornithine is converted into short-chain fatty  
157 acids, was commonly interrupted for all mutant strains except  $\Delta nilR$ . Amino acid biosynthetic pathway transcripts  
158 were differently regulated between these three strains, with tyrosine, and the alanine, aspartate, and glutamate  
159 biosynthetic pathways similarly disrupted. Histidine and valine metabolism was uniquely altered by the  $\Delta rpoS$   
160 mutation, glycine, serine, and threonine metabolism was uniquely altered by the  $\Delta lrhA$  mutation, and phenylalanine  
161 metabolism was uniquely altered by the  $\Delta lrp$  mutation. To investigate the impacts these pathways and others have on  
162 the *Xenorhabdus-Steinernema* lifecycle, a time course metabolomics experiment was designed to measure the relative  
163 quantities of metabolites within them.

164

### 165 **The metabolomic profile of EPNB-infected *G. mellonella*: an overview**

166 Having established that *X. nematophila* bacteria consume infected insect tissue, and in turn the bacteria are  
167 consumed by reproducing and developing nematodes, the temporal dynamics of metabolic profiles associated with  
168 these processes were examined. *G. mellonella* were infected with *S. carpocapsae* infective juveniles colonized by *X.*  
169 *nematophila* bacteria. Weights of the whole insect samples were relatively similar (Table S2). Insects were sampled  
170 over a 16-day time-course. As expected, insects began to die by Hour 24 after infection, and both living and dead  
171 insects were sampled at that time point. *X. nematophila* will have reproduced rapidly in order to suppress the insect  
172 immune response and release toxins to kill the insect host. By the second day post-infection all insects had  
173 succumbed to infection and were dead. Consistent with the initial degradation of the insect cadaver by bacteria  
174 predicted by the trophic analysis conducted above, the nematodes began to reproduce by Day 4, 3 days after the  
175 insects had died from infection (Fig. 3). At Day 7 post-infection, insect cadavers were placed in a collection trap to  
176 encourage the emergence of progeny *S. carpocapsae* IJs. Adults and IJs were observed at this stage. This is when the  
177 2<sup>nd</sup> generation of nematodes begin to emerge, and endotokia matricida is occurring when some of these juveniles will  
178 consume their parents for nutrients. By Day 16 the insect cadavers were largely consumed, and most remaining IJs  
179 will have exited. On Day 16 the *S. carpocapsae* IJs, colonized by *X. nematophila* symbionts, were collected from the  
180 water trap and analyzed with the other samples. The proportions of nematodes observed at these stages are consistent  
181 with previous observations, in which there are more adults and juveniles during the middle phase compared to IJs  
182 which changes to high numbers of IJs into the late phase (8). The above observations led us to design a time course  
183 metabolomics experiment in which samples were divided into 3 major time frames: the early infection, characterized

184 by bacterial replication and the killing of the insect host, middle infection, characterized by nematode reproduction  
185 and nutrient conversion of the cadaver, and late infection, characterized by nutrient depletion and IJ emergence.

186 Metabolites were extracted from individual insects sampled over the infection time course and analyzed  
187 using an untargeted UHPLC-HRMS method. The untargeted metabolic profiling analysis revealed 13,748 spectral  
188 features. Through the mass spectrometric measurements, a total of 170 of these features were identified based on  
189 comparison to known exact mass-to-charge ( $m/z$ ) ratio and retention times from a database of central energy  
190 metabolites (Data S3). Another 3,138 unidentified spectral features were included in the analysis and putatively  
191 annotated based on their exact masses compared to a *Xenorhabdus* secondary metabolite database (Data S4). This  
192 database serves as a rich repository to explore secondary metabolite temporal flux in the tripartite ecosystem of  
193 insect, bacteria, and nematode.

#### 194 **Multivariate data analysis shows metabolic profile gradient corresponding to infection progression**

195 Partial least squares-discriminant analysis (PLS-DA) was performed to observe gross chemical environment  
196 changes over time of insect bioconversion to nematode-bacterium complex, when combining all detected metabolite  
197 data. A three-dimensional PLS-DA plot shows a progression of distinct metabolic profiles from uninfected insects  
198 (black circles) to insects in which bacteria and nematodes are reproducing (red and yellow gradients), and finally to  
199 fully consumed insects (green gradients) from which bacterial-colonized infective juvenile populations are emerging  
200 (Fig. 4A). Component 1 is 41.1% and contributes the most significantly to the separation observed in the PLS-DA  
201 plot.

202 To examine which metabolites are responsible for most of the variation represented by the PLS plots,  
203 Variable Importance in Projection (VIP) values for component 1 were calculated. VIP is a weighted sum of squares  
204 of the PLS loadings that considers the amount of explained Y-variation in each dimension. A VIP score >1 indicates  
205 that the metabolite significantly contributed to time point differentiation. Most of the VIP>1 metabolites exhibited a  
206 bimodal pattern, going from very low in the uninfected insect, to rising in the early bacterial replication phase, to  
207 dropping during the middle nematode reproduction phase, and finally rising very high in the late nutrient deplete  
208 phase (Fig. 4B and Data S5). Overall, these metabolites were involved in nucleotide and nucleoside biosynthesis,  
209 NAD<sup>+</sup> biosynthesis, and iron acquisition. These included the purine and pyrimidine metabolites 7-methylguanosine,  
210 guanine, deoxyinosine, uridine, deoxyuridine, and deoxycytidine. Other top metabolites include kynurenic acid and  
211 anthranilate which are precursors to NAD<sup>+</sup> synthesis. Of the top 15 VIPs, ascorbate was the only molecule to exhibit  
212 a decreased abundance over time, dropping from very high abundance to very low later in the time course. This

213 vitamin is necessary for neuron development and could be salvaged from the cadaver to build the nematode nervous  
214 systems (34).

215 Kynurenic acid is an intermediate in the kynurenine pathway and is a way for organisms to synthesize NAD<sup>+</sup>  
216 if they cannot *de novo* synthesize the compound through encoding a quinolinate phosphoribosyltransferase  
217 (QPRTase) (35). *S. carpocapsae*, like *C. elegans*, lacks a standard QPRTase but encodes the uridine monophosphate  
218 phosphoribosyltransferase (*umps-1*) which synthesizes NAD<sup>+</sup> from the kynurenine pathway (35, 36). Significant flux  
219 of this metabolite throughout the lifecycle could be a metabolic signature of nematode NAD<sup>+</sup> production.

220 Phenylacetic acid is a uremic toxin that builds up in kidney patients and is the product of bacterial  
221 metabolisms. In *P. aeruginosa* phenylacetic acid (PAA) accumulates at high cell density and inhibits the Type III  
222 Secretion System (T3SS), which is toxic to host cells (37). *X. nematophila* does not have a T3SS but does have the  
223 evolutionarily related flagellar export apparatus. The transcription factor Lrp positively regulates the flagellar  
224 regulon, as well as the gene encoding the XlpA lipase, an enzyme associated with the ability of *X. nematophila* to  
225 support *S. carpocapsae* reproduction (19, 20). Although not detected by microarray analysis, quantitative reverse  
226 transcriptase analyses indicate that the transcription factor LrhA also positively regulates *xlpA* expression (19). The  
227 relatively higher intensity of phenylacetic acid at later stages of insect bioconversion may signal inhibition of  
228 secretion of bioconversion enzymes.

229 2,3-dihydroxybenzoate is a compound involved in siderophore biosynthesis non-ribosomal peptide  
230 biosynthesis of siderophore, highlighting a potential importance in iron acquisition from the cadaver. Iron itself does  
231 not appear to be limited in the cadaver but it needs to be harvested by the bacteria to aid in nematode reproduction  
232 (38). *X. nematophila* does not encode *entA* or *entB*, genes that participate in the conversion of 2,3-dihydroxybenzoate  
233 to the enterobactin siderophore pathway (36). Siderophore production is necessary for antibiosis in the closely related  
234 *Photorhabdus-Heterorhabditis* EPNB symbiosis, which has characterized *phb* genes that are homologous to the *ent*  
235 genes (38). The *Photorhabdus phb* genes encode proteins that sequester iron from the cadaver to fend off soil-  
236 dwelling bacterial colonizers that exploit the cadaver, and *X. nematophila* does not have any homologs to these genes.  
237 *X. nematophila* does not completely dominate the bacterial community of the insect host, suggesting that other taxa  
238 such as *Alcaligenes* are possibly responsible for this concentration shift (39).

239 To identify patterns and groups of metabolite abundance changes over time, hierarchical clustering was  
240 performed to reveal groups of metabolites that exhibit similar concentration changes over the time course of  
241 bioconversion. A dendrogram of all 170 identified metabolites was generated using the absolute value of the



242 spearman correlation between molecular concentrations, where distance between molecules is defined as  $1-|rs|$  with  $rs$   
243 as the spearman rank correlation between time course data points of said molecules (Fig. 5A). Metabolite  
244 concentration averages were taken for the four time-phases defined: uninfected, early, middle, and late infection.  
245 Metabolite clusters were visualized in a heatmap that displays their pairwise correlation between each molecule (Fig.  
246 S2). A heatmap that shows the metabolite clusters, separated by black bars, with the molecule trends in concentration  
247 change over time was generated (Fig. 5B). There were 10 total metabolite clusters identified, each with a clear  
248 molecular concentration pattern in which the metabolites in that cluster exhibited similar rates of change together  
249 over the time phases.

250 Clusters of metabolites that exhibit similar rates of change for each time phase were examined to gain an  
251 understanding of very broad metabolic pathways affected at each time phase (Data S3). In the early infection phase  
252 relative to the previous uninfected phase, there are increased abundances of Clusters 4 and 5. These clusters contain  
253 metabolites involved in glutathione biosynthesis (glutamate, cysteine, pyroglutamic acid, and  $\text{NADP}^+$ ). Glutathione  
254 intermediates are increasing while glutathione itself (Cluster 3) is decreasing. Decreased abundance of glutathione  
255 paired with increased abundance of synthesis intermediates could be indicative of how the insect is fighting off this  
256 pathogen; the insect immune response attempts to strike an equilibrium between non-specific reactive molecules  
257 released through the phenoloxidase melanization cascade and the antioxidant glutathione which protects against the  
258 reactive molecules (40). Also increasing during this phase are several amino acids, namely those involved in  
259 tryptophan metabolism (tryptophan itself and indole). Metabolites that exhibited continuously decreasing abundances  
260 in the early phase relative to the uninfected phase were mapped onto Clusters 1, 3, 8, 9, and 10. These clusters  
261 contain many compounds, and the highest proportions are involved in purine and pyrimidine biosynthesis and  
262 ascorbate metabolism (myo-Inositol, UDP-glucose, UDP-glucuronate, and glucarate). From the microarray data,  
263 generally the regulator mutants caused transcripts in ascorbate (*nilR*, *lrp*) and tryptophan (*lrhA*, *rpoS*) to decrease.  
264 These data from the early phase represent the clusters of metabolites that could be targeted by the bacteria to induce  
265 insect death and the metabolites used by the insect to fight the losing war.

266 From the early phase into the middle infection phase, few clusters exhibit an increase in rates of change.  
267 These metabolites are in Clusters 8 and 10, which contain several purine components (deoxyinosine, xanthosine, and  
268 inosine) as well as one of the only B vitamins detected in this screen, riboflavin (vitamin  $\text{B}_2$ ). Other detected B  
269 vitamins, like biotin (vitamin  $\text{B}_7$ ), pantothenate (vitamin  $\text{B}_5$ ), and 4-pyridoxate (catabolic product of vitamin  $\text{B}_6$ ), are  
270 decreasing in abundance during the middle phase. Many other compounds decreased in abundance during the middle  
271 infection phase, relative to the previous early infection phase. These include amino acids (arginine, phenylalanine,

272 tyrosine, tryptophan, cysteine, and methionine), which could reflect that these are the amino acids being incorporated  
273 into protein creation for bacterial and nematode biomass accumulation. Microarray analysis indicates widespread  
274 differential regulation in these amino acid categories, particularly in the secondary form, *lrp*, and *lrhA* mutants. Other  
275 decreasing compounds include pyrimidine intermediates (UMP, CMP, CDP, and UDP) and ascorbate and sugar acid  
276 compounds. These data from the middle phase are reflective of the compounds that are being syphoned from the  
277 cadaver and incorporated into the nematode lifecycle.

278 As the insect cadavers entered the late infection phase, nucleic acids (guanine, thymine, and uracil) and  
279 amino acids (arginine, cysteine and methionine, and aspartate) steeply increased. This suggests these accumulating  
280 compounds are available for nematode DNA, RNA, and protein incorporation, but other factors such as overcrowding  
281 in the cadaver or lack of other necessary resources force the nematode to exit. Decreasing rate of change of  
282 metabolites relative to the previous middle phase included compounds involved with leucine metabolism and the  
283 TCA cycle. These could be more rate-limiting compounds, where their decreasing abundance could signal to the  
284 expanding nematode population that it is time to exit.

### 285 **Interference of insect tricarboxylic acid (TCA) cycle is critical for infection success and subsequent** 286 **propagation of nematodes**

287 To identify significant metabolites that are important for infection progression, an ANOVA with post-hoc  
288 Tukey's HSD test was performed on metabolite abundances throughout the lifecycle. Two comparisons were  
289 examined: metabolite abundances from uninfected insects compared to individual time points, and individual time  
290 points compared to the next subsequent time point. As summarized in Figure 6, TCA cycle components significantly  
291 ( $p < 0.05$ ) fluctuate in relation to uninfected insects as well as between time phases, throughout the time course.  
292 Additionally, significant flux in amino acid metabolism were identified. These trends, especially pertaining to proline  
293 and leucine biosynthesis, reveal the importance of insect bioconversion into building blocks essential for nematode  
294 development (Supplementary text).

295 In the early phase of infection, while the insect is still alive and combatting bacteria and nematode invaders  
296 using innate immunity, several key TCA cycle intermediates are reduced in abundance relative to an uninfected insect  
297 (Fig. 6). This is shown through significantly decreased abundances of citrate in the Hour 12 and Hour 24 living  
298 insects compared to the uninfected insect and the Hour 24 dead insects. Although not significant, a similar trend is  
299 observed for two other TCA-related metabolites, malate and *sn*-glycerol-3-phosphate, which aids in  $\text{NAD}^+$   
300 regeneration through the glycerol phosphate shuttle, as well as  $\text{NAD}^+$ , NADH, fumarate. This could mean these  
301 metabolites were diverted for the immune response, given the differences between the living and dead insects. As the

302 infection progresses into a middle phase, citrate abundances flux, but generally are decreasing. Into the late phase on  
303 Day 10, malate, *sn*-glycerol phosphate, succinate, and citrate all drop, which could suggest carbon is being stored  
304 (rather than used) in the IJs before they exit the cadaver.

305 TCA cycle components were mostly in Cluster 6 (*sn*-glycerol-3-phosphate, NAD<sup>+</sup>, NADH, citrate and  
306 isocitrate) and Cluster 2 (fumarate, alpha-Ketoglutarate). Student t-tests were utilized to determine additional  
307 significant components by comparing each broad time phase to the uninfected insects (Data S3). Acetyl-phosphate  
308 was found to be approaching significantly high ( $p<0.1$ ) at the early phase and was significantly high ( $p<0.05$ ) at the  
309 middle and late phases. NAD<sup>+</sup> was found to be approaching significantly low ( $p<0.1$ ) at the early and middle phases  
310 and was significantly low ( $p<0.05$ ) for the late phase. *Xenorhabdus* spp. cannot synthesize NAD<sup>+</sup> and requires  
311 nicotinate for growth (41). Generally, the trend for all TCA components in the lifecycle seem to be decreasing as the  
312 infection progresses with the exceptions of acetyl-phosphate, FAD, and succinate.

313 The aforementioned *X. nematophila* mutants experienced differences in transcripts involved in either  
314 pyruvate metabolism, glyoxylate metabolism, or the TCA cycle (Data S2). Most of these genes were regulated in the  
315  $\Delta$ *lrhA* and  $\Delta$ *rpoS* mutant backgrounds. *aceA* and *aceB* are negatively regulated, while *aceE* and *aceF* were positively  
316 regulated between  $\Delta$ *lrhA* and  $\Delta$ *rpoS* mutant strains and WT. These genes are involved in the glyoxylate shunt which  
317 is a pathway utilized by many bacteria and nematodes to convert 2-carbon compounds into energy resources, in the  
318 absence of bountiful sugars (42).  $\Delta$ *rpoS* mutants upregulate several succinate dehydrogenase genes which are  
319 necessary for oxidative phosphorylation. In *E. coli* these genes are regulated in response to different environmental  
320 conditions like iron and heme availability (43).

321 Acetyl-coA is an important node in metabolism, connecting glycolysis, the TCA cycle, fatty acid, amino  
322 acid, and secondary metabolite pathways, and acetate dissimilation (44). RpoS and LrhA positively influence the  
323 expression of AceF, PflB, Pta, and AckA. Pta-AckA comprise the acetate dissimilation (excretion) pathway (44).  
324 Coordinated elevation of these enzymes is predicted to result in lower levels of acetyl-coA and higher levels of  
325 acetylphosphate and acetate, which is excreted and available for use by the nematodes. Acetylphosphate is a  
326 phosphoryl donor for some response regulators and can be a donor for protein acetylation. Protein acetylation, a  
327 ubiquitous post-translational modification in prokaryotes and eukaryotes, is involved in regulation of many different  
328 bacterium-host interactions like chemotaxis, replication, and acid resistance, as well as regulating bacterial DNA-  
329 binding and protein stability (45). Acetylphosphate was detected in the metabolome and generally increased over the  
330 infection, as well as being a VIP>1 metabolite for components 1 and 2. Acetate freely diffuses across membranes and

331 can be incorporated into biomass of both bacteria and nematodes via the glyoxylate shunt (46). *pflB* is predicted to  
332 encode the pyruvate-formate lyase (PFL) enzyme involved in conversion of pyruvate and CoA into formate and  
333 acetyl-coA and is greatly (>7 |fold change|) downregulated in the  $\Delta rpoS$  and  $\Delta lrhA$  mutants relative to wild-type.  
334 PflB converts glucose to formate, and up to one-third of the carbon procured from glucose is converted through this  
335 enzyme in *E. coli* (47). PFL condenses acetyl-CoA and formate, allowing for the microbes to use acetate and formate  
336 (fermentation products) as the sole carbon sources (48). RpoS and LrhA negatively regulate Acs, which is the acetate  
337 assimilation pathway (44). In *E. coli*, Acs activity is inhibited by acetylation of a conserved lysine and its abundance  
338 is negatively regulated by the small RNA SdhX (49). RpoS and LrhA also both negatively regulate the TCA cycle  
339 enzymes AcnA and AceAB, and this inhibition is predicted to result in accumulation of citrate. Citrate and isocitrate  
340 progressively decrease in abundance over the infection cycle and these combined data might indicate that citrate  
341 produced and accumulated by *X. nematophila* bacteria may be a provision for nematodes, consumed during  
342 reproduction.

## 343 Discussion

344 A comprehensive framework to understand how metabolism shifts during infection lifecycles of  
345 entomopathogenic nematodes was established. Physiologically, it was examined that *X. nematophila* bacteria  
346 consume insect tissues, while *S. carpocapsae* nematodes consume bacteria. The high  $TP_{glu-phe}$  of 4.5 observed in the  
347 nematodes emerging from an insect cadaver suggests the IJs were potentially cannibalizing previous generations of  
348 nematodes and/or feeding upon bacteria that were, themselves, already feeding on previous generations of nematodes  
349 and bacteria, since if the colonizing nematodes were feeding on bacterial and insect biomass only, they would register  
350 at around 3.5. Thus, this high trophic level suggests either endotokia matricida (or bagging) in which nematode eggs  
351 hatch within and consume the mother, likely during the second generation of nematodes when nutrients are becoming  
352 depleted, or that some other form of cannibalism is occurring within the cadaver (50). A  $TP_{glu-phe}$  of 4.6 is similar to  
353 many apex predators, such as large marine carnivores or the rare top predators observed in terrestrial ecosystems (51,  
354 52). This underscores the importance of including microbes in studies of organismal trophic identity. In effect, the  
355 cadavers used in this study may represent microcosms of the broader communities and ecosystems in which they are  
356 embedded. The insect cadavers were, when alive, herbivores. To find multiple levels of carnivory within a single  
357 cadaver suggests that a nematode-colonized arthropod mirrors the trophic richness of the broader food-web. The  
358 interdigitation of microbial carnivores in a trophic hierarchy—here, nematodes and bacteria—is likely a much more  
359 common feature of food-webs than previously thought (28, 53). The microbial trophic identities reported in this study  
360 may necessitate a re-calibration of organismal niche concepts, but in so doing, will facilitate the unification of the  
361 macro- and microbiome in food web ecology.

362 It should be emphasized that it has been exceedingly uncommon to find higher-order consumers (TP > 4.0)  
363 in a community or ecosystem, given that apex predators feed upon other predators that have, themselves, had to find  
364 and subdue 'lower' carnivores (54). In classical food web ecology, apex predators are generally considered to be  
365 large, fierce, and rare vertebrates (55). However, perhaps the assumption that apex predators exist only within the  
366 province of large/fierce/rare vertebrates needs to be revisited. The high trophic positions exhibited by the nematodes  
367 in this study suggest that such obligate higher-order consumers are more common than previously thought, with  
368 multitudes of apex carnivores existing underfoot in many terrestrial ecosystems. Further, the nematodes can be  
369 viewed as farming their symbionts: acting as shepherds that bring their bacterial flock to a fresh insect pasture for  
370 harvesting of nutrients.

371 The trophic study established the foundation to understand metabolic shifts occurring in the cadaver. The  
372 time course metabolomics study sought to better understand the process of bioconversion in the cadaver, how is the  
373 insect biomass being converted to bacterial and nematode biomass? Applying multivariate statistical tests to the  
374 infection metabolomics data set revealed distinct time phase clustering. The variance among the time phases seems to  
375 increase as infection progresses, as the healthy insects degrades into bacteria and nematode tissue. Nematode IJ  
376 samples were also compared to these time phases. These samples form a distinct cluster away from the other time  
377 phases (Fig. S3). The IJ samples completely removed from the lifecycle seem to have metabolic profiles most similar  
378 to the late time phase, which are insect samples bursting with nematodes (Fig. 3). However, it is important to note  
379 that these are input IJs that have spent weeks outside of an insect cadaver. Reassessing this analysis with output IJs  
380 that are recently from the nematode is important to follow up on.

381 Metabolic analysis revealed TCA cycle components were among the most significant results, indicating that  
382 their use by the entomopathogenic nematodes is paramount to infection success and subsequent nematode  
383 propagation. Citrate metabolism is ubiquitous in many intracellular pathogens and has been found to be involved in  
384 regulating virulence (56). Citrate is necessary for virulence and growth of the Gram-negative pathogenic bacteria  
385 *Pseudomonas aeruginosa*, where NADH levels were reduced when the bacterium was treated with citrate and host-  
386 killing activity was abolished as a result (57). This group hypothesized that this could be due to decreased flux  
387 through the glyoxylate bypass, which has been found to activate the T3SS in this system (58). As mentioned, *X.*  
388 *nematophila* does not encode a T3SS, but does have the evolutionarily related flagellar export apparatus. Several *X.*  
389 *nematophila* glyoxylate bypass genes, were differentially transcribed between avirulent genetic mutants and WT.  
390 Glyoxylate was not detected in our screen, and whether flux through this pathway affects virulence should be  
391 investigated further. The significant flux of TCA metabolites during the middle phase may be indicative of the role of  
392 the TCA cycle in *S. carpocapsae* development, as the TCA cycle has been shown to be essential in early

393 embryogenesis in *C. elegans* (59, 60). Citrate synthase (*cts-1*) and cyclin-dependent kinase 1 (*cdk-1*) were inhibited  
394 in these studies and halted *C. elegans* development, and both genes have orthologs in *S. carpocapsae*. Neutral lipids  
395 are formed from *sn*-glycerol-3-phosphate and are the major energy reserve in the closely related *S. feltiae* nematodes  
396 (61). Fats are stored as lipid droplets in *C. elegans* dauer larvae intestines and serve as a starvation survival  
397 mechanism (62). The previously mentioned glyoxylate bypass forms carbohydrates from fatty acids and has been  
398 implicated in extending the lifecycle of *C. elegans* (63), highlighting another role of this TCA vs. glyoxylate  
399 switching that could be happening later in the life cycle. Any indication that cholesterol is being synthesized from  
400 these intermediates can be attributed entirely to the insect's wheat germ diet, as the *X. nematophila*, *S. carpocapsae*,  
401 or *G. mellonella* cannot synthesize sterols but require them to grow (64).

402         Additionally, metabolites such as 2,3-dihydroxybenzoate that are not synthesized by *X. nematophila* or *S.*  
403 *carpocapsae* were found to increase over the infection, past insect death. *X. nematophila* does not encode the genes  
404 that convert 2,3-dihydroxybenzoate to the siderophore enterobactin, which bind iron to create the ferric enterobactin  
405 (FeEnt) complex (65). However, *X. nematophila* encodes FepB, a periplasmic enterobactin binding protein, as well as  
406 FepC, FepD, and FepG, which transport the FeEnt into the cell. This increased abundance of this compound suggests  
407 other *G. mellonella* microbiome members that survive infection synthesize a compound that is paramount in iron  
408 extraction and could contribute to the overall fitness of this symbiosis.

409         Metabolic analysis also revealed the significance in proline throughout the lifecycle. Insect hemolymph is  
410 rich in proline and is used as a main fuel source in some species of flying insects because of its ability to oxidize  
411 carbohydrates (66). Proline can be a signal molecule inducing secondary metabolite biosynthesis in *Xenorhabdus*  
412 species. Several known virulence factors and antibiotics are regulated via exogenously supplied proline to  
413 *Xenorhabdus* cultures (67). *Xenorhabdus* species may have evolved to use proline in insect hemolymph as a preferred  
414 amino acid source capable of enhancing the bacterium's virulence as well as protecting it from various stressors it  
415 meets in the insect body. Proline catabolism has also been implicated in promoting stress responses and modulating  
416 innate immunity in *C. elegans*, highlighting a possible mechanism by which *S. carpocapsae* survives reactive oxygen  
417 species produced by the insect, bacterium, or themselves (68). Enhanced understanding of proline changes over time  
418 in the EPNB lifecycle highlights the multiple roles this amino acid is playing for both *Xenorhabdus* virulence and  
419 *Steinernema* protection and reproduction. Additional amino acids were found to exhibit similar concentration shifts  
420 over the lifecycle via the hierarchical clustering analysis. This machine learning technique can be improved with  
421 higher granularity of sample time points, which would strengthen the software developed for this study and allowing  
422 it to be used to study more complex and dynamic chemical environments.

423 We have shown how the parasitic EPNB infection shapes the insect host metabolism. The trophic hierarchy  
424 improved how we understand the parasites replicate in the host and highlights the importance of including microbes  
425 in these studies. Through rigorous metabolic pathway reconstruction and multivariate statistics, these results suggest  
426 each phase of the symbiosis can be characterized by stage-specific chemical signatures. Future targeted metabolomics  
427 experiments on EPNB symbioses should be developed to expand the specific trends elucidated by this study. This  
428 work adds to a growing scientific foundation on how symbioses, both mutualistic and parasitic, shape the chemical  
429 environments they inhabit.

## 430 **Materials and Methods**

### 431 **Conventional nematode and aposymbiotic nematode production**

434 *S. carpocapsae* nematodes (All strain) were propagated through 5<sup>th</sup> instar larvae of insect *G. mellonella* and using  
435 white trp and conventional IJs were collected by trapping in distilled water at stored at room temperature for <1.5  
436 months (69). To generate aposymbiotic IJs, *X. nematophila*  $\Delta SR1$  mutant were grown in Luria Broth (LB) media  
437 overnight at 30°C on cell culture wheel and 600 $\mu$ L of overnight bacterial culture were spread onto each of 10mL of  
438 lipid agar to grow into confluent lawn at 25°C for 48 hours. Conventional IJs were surface-sterilized, seeded onto  
439  $\Delta SR1$  mutant lawn on lipid agar plates (5000 IJs per 10mL media), and incubated at 25°C for 7 days in dark for  
440 nematode reproduction. Aposymbiotic IJs were collected by water-trapping using distilled water and stored at room  
441 temperature in dark (69).

### 442 ***In vitro* controlled feeding experiment**

443 To collect bacteria sample feeding on terrestrial C3 plants and yeast-based media, *X. nematophila* wild-type or  $\Delta SR1$   
444 mutant bacteria were grown in the dark yeast soy broth (0.5% yeast extract, 3% tryptic soy broth, and 0.5% NaCl)  
445 modified from the bacterial growth media from (70) at 30°C on cell culture wheel. Wild-type bacterial overnight  
446 cultures (5mL per condition per biological replicate) were collected into microfuge tubes, spun down at >5000RPM,  
447 and washed for three times using 1x PBS buffer by resuspending and spinning down the bacterial pellets. Exactly  
448 600 $\mu$ L of  $\Delta SR1$  mutant were spread onto yeast-soy lipid agar plates (0.5% yeast extract, 3% tryptic soy broth, 1.5%  
449 agar, 0.2% MgCl<sub>2</sub>, 0.7% corn syrup, 0.4% soy bean oil, supplemented with 40 $\mu$ g cholesterol at per liter of media) and  
450 incubated for 48h at 25°C to grow into a confluent lawn. Bacterial lawns were washed off the agar plate using 1x  
451 PBS, pelleted and washed as described above. Three individual tubes of bacterial culture were used per strain as three  
452 independent biological replicates. To grow nematodes using a controlled diet, approximately 5000 conventional IJs

453 were surface-sterilized and seeded onto bacterial lawn grown on yeast-soy lipid agar plate as described above. Three  
454 individual yeast-soy lipid agar plates were used as three biological replicates for each bacterial condition. Three days  
455 post seeding IJs, first generation reproductive stage of nematodes (adult males and females) were collected by  
456 flooding the bacterial lawn with 1x PBS buffer to resuspend the nematodes. The nematode suspension were collected  
457 in the glass cell culture tube and washed for three times by resuspending in 1x PBS buffer. Seven days post seeding  
458 the IJs, second generation IJ progenies were collected using distilled water traps and washed in water for three times  
459 (settle by gravity and resuspension).

#### 460 ***In vivo* feeding experiment and sample collection**

461 To prepare insect controls, *G. mellonella* 5<sup>th</sup> instar larvae were injected with 10uL of either 1x PBS buffer, yeast-soy  
462 broth media, or nothing. Three insect larvae were prepared per condition as three biological replicates. To collect  
463 nematodes directly fed on *Galleria* insect tissues, *S. carpocapsae* axenic eggs were extracted from adult female  
464 nematodes grown on yeast-soy lipid agar plates. Approximately 6000 axenic eggs were seeded to each of the  
465 *Galleria*-tissue agar plate (20% (w/v) frozen *G. mellonella* insects cleaned, blended and filtered; 0.5% (w/v) NaCl;  
466 and 1.5% (w/v) agar, supplemented with 50mg/L Kanamycin). Mixed-stages of nematodes were collected by  
467 flooding the *Galleria*-tissue agar with 1x PBS to resuspend the nematodes, then washed in 1x PBS and water for 3  
468 times to separate nematodes from insect tissue debris. To establish controlled feeding experiments *in vivo* for bacteria  
469 and nematodes, *X. nematophila* overnight cultures (in yeast-soy broth) were diluted in 1xPBS buffer, approximately  
470 10<sup>4</sup> bacterial cells were injected with or without aposymbiotic nematodes (100 IJs per insect). Insect cadaver injected  
471 with bacteria only were directly lyophilized and used as insect-bacteria complex controls (see methods below).  
472 Insects with bacteria and nematodes co-injection mixture were used to collect IJ progenies by water-trapping,  
473 washing (3x in distilled water), and pelleting the IJ samples. Three to five insects were used for each experimental  
474 condition as biological replicates.

#### 475 **Nematode lyophilization and trophic position analysis**

476 Nematodes from *G. mellonella* were collected by placing infected cadavers in modified White traps in which  
477 nematodes migrate into distilled water. Trapped nematodes were transferred to Falcon test tubes and allowed settle  
478 into a pellet at the bottom of the tube. Nematodes from plate cultivations were harvested by rinsing with sterile  
479 distilled water, transferred to Falcon test tubes, and allowed to settle. Samples of nematodes were stored in water at  
480 10°C no longer than a few days until they were lyophilized. For lyophilization, water was decanted off of the sample  
481 until only the undisturbed pellet remained at the bottom of the test tube. The top of the test tube was covered with a



482 Kimwipe held in place with a rubber band before lyophilization for >48 h in a Labconco Freezone lyophilizer. During  
483 this time, pressures fell below 0.2 millibar, and temperatures reached -50°C. Once the samples had been thoroughly  
484 lyophilized, they were removed from tubes using a laboratory spatula that was sterilized with ethanol and dried with  
485 kimwipe after every use. Each individual sample was relocated into a sterile 1.5 ml microfuge tube and stored at  
486 room temperature for 1-3 months until shipment to Hokkaido, Japan for analysis.

487 Trophic position (TP<sub>glu-phe</sub>) estimates were generated using the following equation:

$$TP = \frac{\delta^{15}N_{glu} - \delta^{15}N_{phe} + |\beta|}{\Delta_{glu-phe}} + \lambda$$

488 where  $\delta^{15}N_{glu}$  represents the nitrogen isotopic ratio of glutamic acid,  $\delta^{15}N_{phe}$  represents the nitrogen isotopic ratio of  
489 phenylalanine,  $\beta$  corrects for the difference in  $^{15}N$  values between glutamic acid and phenylalanine within the primary  
490 producers of the food web (e.g.  $\beta \sim 8.4\%$  for C3 plants),  $\Delta_{glu-phe}$  represents the net trophic discrimination between  
491 glutamic acid and phenylalanine, and  $\lambda$  represents the basal trophic level (=1) of the food web (52). The trophic  
492 discrimination factor,  $\Delta_{glu-phe}$  (referred to here as the TDF<sub>glu-phe</sub>), represents the net intertrophic  $^{15}N$ -discrimination  
493 between glutamic acid and phenylalanine. Significant differences between known and observed TP values were  
494 examined using univariate ANOVA and nonparametric tests (paired Wilcoxon signed rank tests where data were  
495 heteroscedastic). Distinguishing among TDF values was accomplished using paired t tests (71).

#### 496 **Metabolomics sample collection**

497 As per normal infection protocols, 11 *G. mellonella* larvae (Grubco) were placed in the bottom of each of six 6 x 1.5  
498 cm petri plates lined with 2 pieces of #1 filter paper. The filter paper was then inoculated with 1 ml of conventional *S.*  
499 *carpocapsae* IJ stage nematodes (carrying *X. nematophila* bacteria in their intestinal receptacle) to achieve a final  
500 average concentration of 10 IJ/ $\mu$ l. At each specified time point (see below), one *G. mellonella* was taken from each of  
501 plates 1-5. All insect samples were flash frozen using a dry ice-ethanol bath, and subsequently stored at -80°C. The  
502 uninfected, Hour 1 post-infection and Hour 12 post-infection data points were taken of live *G. mellonella*. Since the  
503 *G. mellonella* were starting to succumb to the infection at Hour 24, one living and one dead insect was taken at this  
504 time point. At Day 7 post-infection, a water trap was set up to enable IJ emergence. At Day 12, the last of the *G.*  
505 *mellonella* from plates 1-5 was used, so insects representing the Day 16 time point were taken entirely from plate 6.  
506 Input *S. carpocapsae* IJ and *X. nematophila* symbionts were also collected from the lab stocks and sent for analysis,  
507 approximately 50  $\mu$ l of settled IJ per sample, and a total of 4 samples were sent.

## 508 **Preparation for mass spectrometry**

509 For metabolite extraction, *G. mellonella* insects were equilibrated to -20°C for ~1 h, 300 µl of extraction solution  
510 (40:40:20 acetic acid, methanol, and water) was added, and insects were ground using a pestle that fit snugly into the  
511 sample tube. All manipulations were performed in a cold room and samples were processed in groups of 12. After  
512 grinding, to each tube an additional 1000 µl of extraction solution was added and vortexed for 5-10 sec before being  
513 placed at -20°C for 20 min. Tubes were centrifuged at 16,200 x g for 5 min, and the supernatant was decanted to a  
514 clean tube. To the original insect sample an additional 200 µl of extraction solution was added, mixed with a pipette  
515 tip, vortexed for 5-10 sec, and incubated at -20°C for 20 min. After pelleting the supernatant was combined with the  
516 first supernatant sample. Samples were dried (Savant), resuspended, and randomized samples were analyzed  
517 consecutively by mass spectrometry using an established 25-minute method (72).

## 518 **Metabolomics analysis**

519 An established untargeted metabolomics method utilizing ultra-high performance liquid chromatography coupled to  
520 high resolution mass spectrometry (UHPLC-HRMS) (Thermo Scientific, San Jose, CA, USA) was used to analyze  
521 water-soluble metabolites (71). A Synergi 2.6 µm Hydro RP column 100 Å, 100 mm x 2.1 mm (Phenomenex,  
522 Torrance, CA) and an UltiMate 3000 pump (Thermo Fisher) were used to carry out the chromatographic separations  
523 prior to full scan mass analysis by an Exactive Plus Orbitrap MS (Thermo Fisher). HPLC grade solvents (Fisher  
524 Scientific, Hampton, NH, USA) were used. Chromatographic peak areas for each detected metabolite were integrated  
525 using an open-source software package, Metabolomic Analysis and Visualization Engine (MAVEN) (73, 74). Area  
526 under the curve (AUC) was used for further analyses.

## 527 **Bacterial strains, plasmids, and culture conditions**

528 Table S1 lists strains used for this study with references where they were originally published. Unless specifically  
529 mentioned, *E. coli* were grown in LB broth or on LB plates at 37°C; *X. nematophila* were grown in LB broth or on  
530 LB plates supplemented with 0.1% pyruvate at 30°C and kept in dark. Where appropriate, the following antibiotic  
531 concentrations were used: ampicillin, 150 µg/ml for *E. coli* and 50 µg/ml for *X. nematophila*; chloramphenicol, 30  
532 µg/ml; erythromycin, 200 µg/ml; kanamycin, 50 µg/ml and streptomycin, 25 µg/ml. *E. coli* donor strain S17 (λpir) or  
533 Δ*asd* strain BW29427 was used to conjugate plasmids into *X. nematophila*.

## 534 **Microarray experiment and data analysis**

535 Bacteria cultures were grown overnight in 3 ml of LB supplemented with 0.1% pyruvate and appropriate antibiotics  
536 in culture tubes at 30°C on roller, subcultured 1:100 into 30 ml of LB supplemented with 0.1% pyruvate and 50 g/ml  
537 ampicillin in 125 ml glass flasks and grown for 12 hours to early stationary phase (OD 2-2.1) at 30°C at 150 rpm on  
538 shaker. 1 ml of each culture was used to extract total RNA using Qiagen RNeasy Mini Kit, and on-column DNA  
539 digestion was performed using Qiagen RNase-Free DNase Set according to manufacturer's protocol (Qiagen,  
540 Valencia, CA). The RNA purity was tested by measuring 260 nm/280 nm and 260 nm/230 nm ratios in TE buffer and  
541 the values should be over 1.8. RNA integrity was verified by running 2 g of RNA samples on 1% denaturing agarose  
542 gel. The samples were then submitted to Roche NimbleGen for processing and microarray analysis. Gene signals for  
543 *lrhA*, *lrp*, and secondary form *X. nematophila* were compared to HGB800 using a 2-fold change average signal  
544 strength cutoff. The *rpoS* mutant was compared to HGB007 using the same significance cutoff. Genes were annotated  
545 via the Magnifying Genomes (MaGe) microbial genome annotation system (75), the STRING database (76), as well  
546 as through BlastKOALA (33).

#### 547 **Statistical analysis**

548 PLS-DA plots were generated in MetaboAnalyst 4.0 on August 3rd, 2020. VIP scores were calculated for each  
549 component. When more than components are used to calculate the feature importance, the average of the VIP scores  
550 are used. The other importance measure is based on the weighted sum of PLS-regression. The weights are a function  
551 of the reduction of the sums of squares across the number of PLS components (77). Samples were normalized before  
552 processing through MetaboAnalyst based on insect weight. Data was log transformed and pareto scaling was applied.  
553 Two-way ANOVA with multiple comparisons and Tukey post-hoc tests were completed by taking individual time  
554 point metabolite abundances and comparing their means to the uninfected insect model and each other. Student t-tests  
555 were performed by comparing uninfected samples to each time phase (early, middle, and late infection). Relevant  
556 metabolic pathways were identified in MetaboAnalyst's "Pathway Analysis" module using *Drosophila melanogaster*,  
557 *Caenorhabditis elegans*, and *Escherichia coli* as KEGG pathway libraries (78).

#### 558 **References**

- 559  
560  
561 1. L. Margulis, *Symbiosis in cell evolution : life and its environment on the early Earth*. (W. H. Freeman, San  
562 Francisco, 1981), pp. xxii, 419 p.  
563 2. A. Camilli, B. L. Bassler, Bacterial small-molecule signaling pathways. *Science* **311**, 1113-1116 (2006).  
564 3. R. J. Worthington, J. J. Richards, C. Melander, Small molecule control of bacterial biofilms. *Org Biomol*  
565 *Chem* **10**, 7457-7474 (2012).  
566 4. J. Chaston, A. E. Douglas, Making the most of "omics" for symbiosis research. *Biol Bull* **223**, 21-29 (2012).  
567 5. S. E. Maddocks, P. C. F. Oyston, Structure and function of the LysR-type transcriptional regulator (LTTR)  
568 family proteins. *Microbiology (Reading)* **154**, 3609-3623 (2008).

- 569 6. J. A. Budnick, L. M. Sheehan, M. J. Ginder, K. C. Failor, J. M. Perkowski, J. F. Pinto, K. A. Kohl, L. Kang, P.  
570 Michalak, L. Luo, J. E. Heindl, C. C. Caswell, A central role for the transcriptional regulator VtIR in small  
571 RNA-mediated gene regulation in *Agrobacterium tumefaciens*. *Sci Rep* **10**, 14968 (2020).
- 572 7. H. Abdelhamed, R. Ramachandran, L. Narayanan, O. Ozdemir, A. Cooper, A. K. Olivier, A. Karsi, M. L.  
573 Lawrence, Contributions of a LysR Transcriptional Regulator to *Listeria monocytogenes* Virulence and  
574 Identification of Its Regulons. *J Bacteriol* **202**, (2020).
- 575 8. M. Cao, H. Goodrich-Blair, *Xenorhabdus nematophila* bacteria shift from mutualistic to virulent Lrp-  
576 dependent phenotypes within the receptacles of *Steinernema carpocapsae* insect-infective stage  
577 nematodes. *Environ Microbiol* **22**, 5433-5449 (2020).
- 578 9. J. Tang, Microbial metabolomics. *Curr Genomics* **12**, 391-403 (2011).
- 579 10. V. V. Phelan, W. J. Moree, J. Aguilar, D. S. Cornett, A. Koumoutsis, S. M. Noble, K. Pogliano, C. A. Guerrero,  
580 P. C. Dorrestein, Impact of a transposon insertion in *phzF2* on the specialized metabolite production and  
581 interkingdom interactions of *Pseudomonas aeruginosa*. *J Bacteriol* **196**, 1683-1693 (2014).
- 582 11. Y. Dong, G. J. Brewer, Global Metabolic Shifts in Age and Alzheimer's Disease Mouse Brains Pivot at  
583 NAD<sup>+</sup>/NADH Redox Sites. *J Alzheimers Dis* **71**, 119-140 (2019).
- 584 12. G. R. Richards, H. Goodrich-Blair, Masters of conquest and pillage: *Xenorhabdus nematophila* global  
585 regulators control transitions from virulence to nutrient acquisition. *Cell Microbiol* **11**, 1025-1033 (2009).
- 586 13. S. P. Stock, Partners in crime: symbiont-assisted resource acquisition in *Steinernema* entomopathogenic  
587 nematodes. *Curr Opin Insect Sci* **32**, 22-27 (2019).
- 588 14. M. Javal, J. S. Terblanche, D. E. Conlong, A. P. Malan, First Screening of Entomopathogenic Nematodes  
589 and Fungus as Biocontrol Agents against an Emerging Pest of Sugarcane, *Cacosceles newmannii*  
590 (*Coleoptera: Cerambycidae*). *Insects* **10**, (2019).
- 591 15. W. J. da Silva, H. L. Pilz-Junior, R. Heermann, O. S. da Silva, The great potential of entomopathogenic  
592 bacteria *Xenorhabdus* and *Photorhabdus* for mosquito control: a review. *Parasit Vectors* **13**, 376 (2020).
- 593 16. N. Killiny, Generous hosts: Why the larvae of greater wax moth, *Galleria mellonella* is a perfect infectious  
594 host model? *Virulence* **9**, 860-865 (2018).
- 595 17. E. E. Herbert, H. Goodrich-Blair, Friend and foe: the two faces of *Xenorhabdus nematophila*. *Nat Rev*  
596 *Microbiol* **5**, 634-646 (2007).
- 597 18. D. K. Mitani, H. K. Kaya, H. Goodrich-Blair, Comparative study of the entomopathogenic nematode,  
598 *Steinernema carpocapsae*, reared on mutant and wild-type *Xenorhabdus nematophila*. *Biological Control*  
599 **29**, 382-391 (2004).
- 500 19. G. R. Richards, E. E. Herbert, Y. Park, H. Goodrich-Blair, *Xenorhabdus nematophila* *lrhA* is necessary for  
501 motility, lipase activity, toxin expression, and virulence in *Manduca sexta* insects. *J Bacteriol* **190**, 4870-  
502 4879 (2008).
- 503 20. G. R. Richards, H. Goodrich-Blair, Examination of *Xenorhabdus nematophila* lipases in pathogenic and  
504 mutualistic host interactions reveals a role for *xlpA* in nematode progeny production. *Appl Environ*  
505 *Microbiol* **76**, 221-229 (2010).
- 506 21. E. I. Vivas, H. Goodrich-Blair, *Xenorhabdus nematophilus* as a model for host-bacterium interactions: *rpoS*  
507 is necessary for mutualism with nematodes. *J Bacteriol* **183**, 4687-4693 (2001).
- 508 22. E. E. Herbert Tran, H. Goodrich-Blair, CpxRA Contributes to *Xenorhabdus nematophila* Virulence through  
509 Regulation of *lrhA* and Modulation of Insect Immunity. *Applied and Environmental Microbiology* **75**, 3998  
510 (2009).
- 511 23. K. N. Cowles, C. E. Cowles, G. R. Richards, E. C. Martens, H. Goodrich-Blair, The global regulator Lrp  
512 contributes to mutualism, pathogenesis and phenotypic variation in the bacterium *Xenorhabdus*  
513 *nematophila*. *Cell Microbiol* **9**, 1311-1323 (2007).
- 514 24. C. E. Cowles, H. Goodrich-Blair, *nilR* is necessary for co-ordinate repression of *Xenorhabdus nematophila*  
515 mutualism genes. *Molecular microbiology* **62**, 760-771 (2006).
- 516 25. D. Park, S. Forst, Co-regulation of motility, exoenzyme and antibiotic production by the EnvZ-OmpR-  
517 FliHDC-FliA pathway in *Xenorhabdus nematophila*. *Mol Microbiol* **61**, 1397-1412 (2006).
- 518 26. A. Givaudan, S. Baghdigian, A. Lanois, N. Boemare, Swarming and Swimming Changes Concomitant with  
519 Phase Variation in *Xenorhabdus nematophilus*. *Appl Environ Microbiol* **61**, 1408-1413 (1995).
- 520 27. M. C. Cambon, N. Parthuisot, S. Pagès, A. Lanois, A. Givaudan, J.-B. Ferdy, Selection of Bacterial Mutants in  
521 Late Infections: When Vector Transmission Trades Off against Growth Advantage in Stationary Phase.  
522 *mBio* **10**, e01437-01419 (2019).
- 523 28. S. A. Steffan, Y. Chikaraishi, P. S. Dharampal, J. N. Pauli, C. Guedot, N. Ohkouchi, Unpacking brown food-  
524 webs: Animal trophic identity reflects rampant microbivory. *Ecol Evol* **7**, 3532-3541 (2017).
- 525 29. C. E. Cowles, H. Goodrich-Blair, The *Xenorhabdus nematophila* *nilABC* genes confer the ability of  
526 *Xenorhabdus* spp. to colonize *Steinernema carpocapsae* nematodes. *J Bacteriol* **190**, 4121-4128 (2008).

- 527 30. E. A. Hussa, A. M. Casanova-Torres, H. Goodrich-Blair, The Global Transcription Factor Lrp Controls  
528 Virulence Modulation in *Xenorhabdus nematophila*. *J Bacteriol* **197**, 3015-3025 (2015).
- 529 31. X. Lu, "Examining Pathogenic and Mutualistic Regulatory Networks in the Bacterium *Xenorhabdus*  
530 *nematophila*," Ph.D. thesis, UW-Madison, Madison, WI (2012).
- 531 32. X. Lu, H. Goodrich-Blair, B. Tjaden, Assessing computational tools for the discovery of small RNA genes in  
532 bacteria. *RNA* **17**, 1635-1647 (2011).
- 533 33. M. Kanehisa, Y. Sato, K. Morishima, BlastKOALA and GhostKOALA: KEGG Tools for Functional  
534 Characterization of Genome and Metagenome Sequences. *J Mol Biol* **428**, 726-731 (2016).
- 535 34. J. M. May, Z. C. Qu, M. E. Meredith, Mechanisms of ascorbic acid stimulation of norepinephrine synthesis  
536 in neuronal cells. *Biochem Biophys Res Commun* **426**, 148-152 (2012).
- 537 35. Y. Lee, H. Jeong, K. H. Park, K. W. Kim, Effects of NAD(+) in *Caenorhabditis elegans* Models of Neuronal  
538 Damage. *Biomolecules* **10**, (2020).
- 539 36. A. Rougon-Cardoso, M. Flores-Ponce, H. E. Ramos-Aboites, C. E. Martinez-Guerrero, Y. J. Hao, L. Cunha, J.  
540 A. Rodriguez-Martinez, C. Ovando-Vazquez, J. R. Bermudez-Barrientos, C. Abreu-Goodger, N. Chavarria-  
541 Hernandez, N. Simoes, R. Montiel, The genome, transcriptome, and proteome of the nematode  
542 *Steinernema carpocapsae*: evolutionary signatures of a pathogenic lifestyle. *Sci Rep* **6**, 37536 (2016).
- 543 37. J. Wang, Y.-H. Dong, T. Zhou, X. Liu, Y. Deng, C. Wang, J. Lee, L.-H. Zhang, *Pseudomonas aeruginosa*  
544 Cytotoxicity Is Attenuated at High Cell Density and Associated with the Accumulation of Phenylacetic  
545 Acid. *PLoS one* **8**, e60187 (2013).
- 546 38. T. A. Ciche, M. Blackburn, J. R. Carney, J. C. Ensign, Photobactin: a catechol siderophore produced by  
547 *Photorhabdus luminescens*, an entomopathogen mutually associated with *Heterorhabditis bacteriophora*  
548 NC1 nematodes. *Appl Environ Microbiol* **69**, 4706-4713 (2003).
- 549 39. M. C. Cambon, P. Lafont, M. Frayssinet, A. Lanois, J. C. Ogier, S. Pages, N. Parthuisot, J. B. Ferdy, S.  
550 Gaudriault, Bacterial community profile after the lethal infection of *Steinernema-Xenorhabdus* pairs into  
551 soil-reared *Tenebrio molitor* larvae. *FEMS Microbiol Ecol* **96**, (2020).
- 552 40. K. D. Clark, Z. Lu, M. R. Strand, Regulation of melanization by glutathione in the moth *Pseudoplusia*  
553 *includens*. *Insect Biochem Mol Biol* **40**, 460-467 (2010).
- 554 41. E. C. Martens, F. M. Russell, H. Goodrich-Blair, Analysis of *Xenorhabdus nematophila* metabolic mutants  
555 yields insight into stages of *Steinernema carpocapsae* nematode intestinal colonization. *Mol Microbiol* **58**,  
556 28-45 (2005).
- 557 42. S. R. Maloy, W. D. Nunn, Genetic regulation of the glyoxylate shunt in *Escherichia coli* K-12. *J Bacteriol*  
558 **149**, 173-180 (1982).
- 559 43. S. J. Park, C. P. Tseng, R. P. Gunsalus, Regulation of succinate dehydrogenase (*sdhCDAB*) operon  
560 expression in *Escherichia coli* in response to carbon supply and anaerobiosis: role of ArcA and Fnr. *Mol*  
561 *Microbiol* **15**, 473-482 (1995).
- 562 44. A. J. Wolfe, Glycolysis for Microbiome Generation. *Microbiol Spectr* **3**, (2015).
- 563 45. J. Ren, Y. Sang, J. Lu, Y. F. Yao, Protein Acetylation and Its Role in Bacterial Virulence. *Trends Microbiol* **25**,  
564 768-779 (2017).
- 565 46. J. T. Alaimo, S. J. Davis, S. S. Song, C. R. Burnette, M. Grotewiel, K. L. Shelton, J. T. Pierce-Shimomura, A. G.  
566 Davies, J. C. Bettinger, Ethanol metabolism and osmolarity modify behavioral responses to ethanol in *C.*  
567 *elegans*. *Alcohol Clin Exp Res* **36**, 1840-1850 (2012).
- 568 47. C. Doberenz, M. Zorn, D. Falke, D. Nannemann, D. Hunger, L. Beyer, C. H. Ihling, J. Meiler, A. Sinz, R. G.  
569 Sawers, Pyruvate formate-lyase interacts directly with the formate channel FocA to regulate formate  
570 translocation. *J Mol Biol* **426**, 2827-2839 (2014).
- 571 48. L. Zelcbuch, S. N. Lindner, Y. Zegman, I. Vainberg Slutskin, N. Antonovsky, S. Gleizer, R. Milo, A. Bar-Even,  
572 Pyruvate Formate-Lyase Enables Efficient Growth of *Escherichia coli* on Acetate and Formate. *Biochemistry*  
573 **55**, 2423-2426 (2016).
- 574 49. F. De Mets, L. Van Melderden, S. Gottesman, Regulation of acetate metabolism and coordination with the  
575 TCA cycle via a processed small RNA. *Proc Natl Acad Sci U S A* **116**, 1043-1052 (2019).
- 576 50. Y. Baliadi, T. Yoshiga, E. Kondo, Infectivity and post-infection development of infective juveniles  
577 originating via endotokia matricida in entomopathogenic nematodes. *Applied Entomology and Zoology*  
578 **39**, 61-69 (2004).
- 579 51. Y. Chikaraishi, N. O. Ogawa, H. Doi, N. Ohkouchi, <sup>15</sup>N/<sup>14</sup>N ratios of amino acids as a tool for studying  
580 terrestrial food webs: a case study of terrestrial insects (bees, wasps, and hornets). *Ecological Research* **26**,  
581 835-844 (2011).
- 582 52. Y. Chikaraishi, S. A. Steffan, N. O. Ogawa, N. F. Ishikawa, Y. Sasaki, M. Tsuchiya, N. Ohkouchi, High-  
583 resolution food webs based on nitrogen isotopic composition of amino acids. *Ecol Evol* **4**, 2423-2449  
584 (2014).

- 585 53. S. A. Steffan, P. S. Dharampal, Undead food-webs: Integrating microbes into the food-chain. *Food Webs*  
586 **18**, e00111 (2019).
- 587 54. R. L. Lindeman, The trophic-dynamic aspect of ecology. *Bulletin of Mathematical Biology* **53**, 167-191  
588 (1942)
- 589 55. P. A. Colinvaux, B. D. Barnett, Lindeman and the Ecological Efficiency of Wolves. *The American Naturalist*  
590 **114**, 707-718 (1979).
- 591 56. G. P. Martino, C. E. Perez, C. Magni, V. S. Blancato, Implications of the expression of *Enterococcus faecalis*  
592 citrate fermentation genes during infection. *PLoS One* **13**, e0205787 (2018).
- 593 57. K. Perinbam, J. V. Chacko, A. Kannan, M. A. Digman, A. Siryaporn, A Shift in Central Metabolism  
594 Accompanies Virulence Activation in *Pseudomonas aeruginosa*. *mBio* **11**, (2020).
- 595 58. J. C. Chung, O. Rzhepishevskaya, M. Ramstedt, M. Welch, Type III secretion system expression in oxygen-  
596 limited *Pseudomonas aeruginosa* cultures is stimulated by isocitrate lyase activity. *Open Biol* **3**, 120131  
597 (2013).
- 598 59. K. Hada, K. Hirota, A. Inanobe, K. Kako, M. Miyata, S. Araoi, M. Matsumoto, R. Ohta, M. Arisawa, H.  
599 Daitoku, T. Hanada, A. Fukamizu, Tricarboxylic acid cycle activity suppresses acetylation of mitochondrial  
700 Harris proteins during early embryonic development in *Caenorhabditis elegans*. *J Biol Chem* **294**, 3091-  
701 3099 (2019).
- 702 60. M. M. Rahman, S. Rosu, D. Joseph-Strauss, O. Cohen-Fix, Down-regulation of tricarboxylic acid (TCA) cycle  
703 genes blocks progression through the first mitotic division in *Caenorhabditis elegans* embryos. *Proc Natl*  
704 *Acad Sci U S A* **111**, 2602-2607 (2014).
- 705 61. D. J. Wright, P. S. Grewal, M. Stolinski, Relative importance of neutral lipids and glycogen as energy stores  
706 in dauer larvae of two entomopathogenic nematodes, *Steinernema carpocapsae* and *Steinernema feltiae*.  
707 *Comp Biochem Physiol B Biochem Mol Biol* **118**, 269-273 (1997).
- 708 62. H. Y. Mak, Lipid droplets as fat storage organelles in *Caenorhabditis elegans*: Thematic Review Series:  
709 Lipid Droplet Synthesis and Metabolism: from Yeast to Man. *J Lipid Res* **53**, 28-33 (2012).
- 710 63. C. B. Edwards, N. Copes, A. G. Brito, J. Canfield, P. C. Bradshaw, Malate and fumarate extend lifespan in  
711 *Caenorhabditis elegans*. *PLoS One* **8**, e58345 (2013).
- 712 64. X. Jing, S. T. Behmer, Insect Sterol Nutrition: Physiological Mechanisms, Ecology, and Applications. *Annu*  
713 *Rev Entomol* **65**, 251-271 (2020).
- 714 65. K. N. Raymond, E. A. Dertz, S. S. Kim, Enterobactin: an archetype for microbial iron transport. *Proc Natl*  
715 *Acad Sci U S A* **100**, 3584-3588 (2003).
- 716 66. L. Teulier, J. M. Weber, J. Crevier, C. A. Darveau, Proline as a fuel for insect flight: enhancing carbohydrate  
717 oxidation in hymenoptera. *Proc Biol Sci* **283**, (2016).
- 718 67. J. M. Crawford, R. Kontnik, J. Clardy, Regulating alternative lifestyles in entomopathogenic bacteria. *Curr*  
719 *Biol* **20**, 69-74 (2010).
- 720 68. H. Tang, S. Pang, Proline Catabolism Modulates Innate Immunity in *Caenorhabditis elegans*. *Cell Rep* **17**,  
721 2837-2844 (2016).
- 722 69. J. G. McMullen, 2nd, S. P. Stock, *In vivo* and *in vitro* rearing of entomopathogenic nematodes  
723 (*Steinernematidae* and *Heterorhabditidae*). *J Vis Exp*, 52096 (2014).
- 724 70. E. J. Buecher, I. Popiel, Liquid Culture of the Entomogenous Nematode *Steinernema feltiae* with Its  
725 Bacterial Symbiont. *J Nematol* **21**, 500-504 (1989).
- 726 71. S. A. Steffan, Y. Chikaraishi, C. R. Currie, H. Horn, H. R. Gaines-Day, J. N. Pauli, J. E. Zalapa, N. Ohkouchi,  
727 Microbes are trophic analogs of animals. *Proc Natl Acad Sci U S A* **112**, 15119-15124 (2015).
- 728 72. W. Lu, M. F. Clasquin, E. Melamud, D. Amador-Noguez, A. A. Caudy, J. D. Rabinowitz, Metabolomic  
729 analysis via reversed-phase ion-pairing liquid chromatography coupled to a stand alone orbitrap mass  
730 spectrometer. *Anal Chem* **82**, 3212-3221 (2010).
- 731 73. M. F. Clasquin, E. Melamud, J. D. Rabinowitz, LC-MS data processing with MAVEN: a metabolomic analysis  
732 and visualization engine. *Curr Protoc Bioinformatics* **Chapter 14**, Unit14 11 (2012).
- 733 74. E. Melamud, L. Vastag, J. D. Rabinowitz, Metabolomic analysis and visualization engine for LC-MS data.  
734 *Anal Chem* **82**, 9818-9826 (2010).
- 735 75. D. Vallenet, L. Labarre, Z. Rouy, V. Barbe, S. Bocs, S. Cruveiller, A. Lajus, G. Pascal, C. Scarpelli, C. Medigue,  
736 MaGe: a microbial genome annotation system supported by synteny results. *Nucleic Acids Res* **34**, 53-65  
737 (2006).
- 738 76. D. Szklarczyk, A. L. Gable, D. Lyon, A. Junge, S. Wyder, J. Huerta-Cepas, M. Simonovic, N. T. Doncheva, J. H.  
739 Morris, P. Bork, L. J. Jensen, C. V. Mering, STRING v11: protein-protein association networks with  
740 increased coverage, supporting functional discovery in genome-wide experimental datasets. *Nucleic*  
741 *Acids Res* **47**, D607-D613 (2019).

- 742 77. J. Chong, J. Xia, Using MetaboAnalyst 4.0 for Metabolomics Data Analysis, Interpretation, and Integration  
743 with Other Omics Data. *Methods Mol Biol* **2104**, 337-360 (2020).  
744 78. M. Kanehisa, M. Furumichi, M. Tanabe, Y. Sato, K. Morishima, KEGG: new perspectives on genomes,  
745 pathways, diseases and drugs. *Nucleic Acids Res* **45**, D353-D361 (2017).  
746

## 747 **Supplementary References**

- 748  
749 79. Y. Chikaraishi, Y. Kashiyama, N. O. Ogawa, Y. Kashiyama, H. Kitazato, N. Ohkouchi, Metabolic control of  
750 nitrogen isotope composition of amino acids in macroalgae and gastropods: implications for aquatic  
751 food web studies. *Marine Ecology Progress Series* **342**, 85-90 (2007).  
752 80. Y. Chikaraishi, N. Ogawa, Y. Kashiyama, Y. Takano, H. Suga, A. Tomitani, H. Miyashita, H. Kitazato, N.  
753 Ohkouchi, Determination of aquatic food-web structure based on compound-specific nitrogen isotopic  
754 composition of amino acids: Trophic level estimation by amino acid  $\delta^{15}N$ . *Limnology and oceanography*  
755 **7**, 740-750 (2009).  
756 81. S. A. Steffan, Y. Chikaraishi, D. R. Horton, N. Ohkouchi, M. E. Singleton, E. Miliczky, D. B. Hogg, V. P. Jones,  
757 Trophic hierarchies illuminated via amino acid isotopic analysis. *PLoS One* **8**, e76152 (2013).  
758 82. M. Watford, Glutamine metabolism and function in relation to proline synthesis and the safety of  
759 glutamine and proline supplementation. *J Nutr* **138**, 2003S-2007S (2008).  
760 83. R. Zheng, X. Feng, X. Wei, X. Pan, C. Liu, R. Song, Y. Jin, F. Bai, S. Jin, W. Wu, Z. Cheng, PutA Is Required for  
761 Virulence and Regulated by PruR in *Pseudomonas aeruginosa*. *Front Microbiol* **9**, 548 (2018).  
762 84. M. L. Di Martino, R. Campilongo, M. Casalino, G. Micheli, B. Colonna, G. Prosseda, Polyamines: emerging  
763 players in bacteria-host interactions. *Int J Med Microbiol* **303**, 484-491 (2013).  
764 85. P. Shah, E. Swiatlo, A multifaceted role for polyamines in bacterial pathogens. *Mol Microbiol* **68**, 4-16  
765 (2008).  
766 86. A. Zecic, I. Dhondt, B. P. Braeckman, The nutritional requirements of *Caenorhabditis elegans*. *Genes Nutr*  
767 **14**, 15 (2019).  
768  
769

## 770 **Acknowledgments**

771 We thank Terra Mauer for her help in insect rearing. We thank Xiaojun Lu for  
772 preprocessing the microarray data. We thank Jordan Rogerson for processing the  
773 metabolomics samples prior analysis.  
774

### 775 **Funding:**

776 National Science Foundation (IOS-1353674)  
777 Funds from the University of Tennessee-Knoxville.  
778 UW-Madison Louis and Elsa Thomsen Wisconsin Distinguished Graduate Fellowship  
779 Department of Bacteriology Michael Foster Predoctoral Fellowship  
780

### 781 **Author contributions:**

782  
783 Conceptualization: NCM, MC, MRW, MT, SS, SC, HGB  
784 Methodology: NCM, KAJ, MC, MRW, SF, SK, MT, YC, SS, SC  
785 Investigation: NCM, KAJ, MC, MRW, SS, SC, HGB  
786 Visualization: NCM, KAJ, MRW, SS, HGB  
787 Supervision: SK, MT, YC, SS, SC, HGB  
788 Writing—original draft: NCM, SS, HGB  
789 Writing—review & editing: NCM, KAJ, MC, MRW, SF, SK, MT, SS, SC, HGB  
790

791 **Competing interests:** Authors declare that they have no competing interests.  
792

793 **Data and materials availability:** All data are available in the main text or the  
794 supplementary materials. Additional detail on the hierarchical clustering analysis can be  
795 found at: <http://doi.org/10.5281/zenodo.3962081>

796  
797  
798

## Figures and Tables

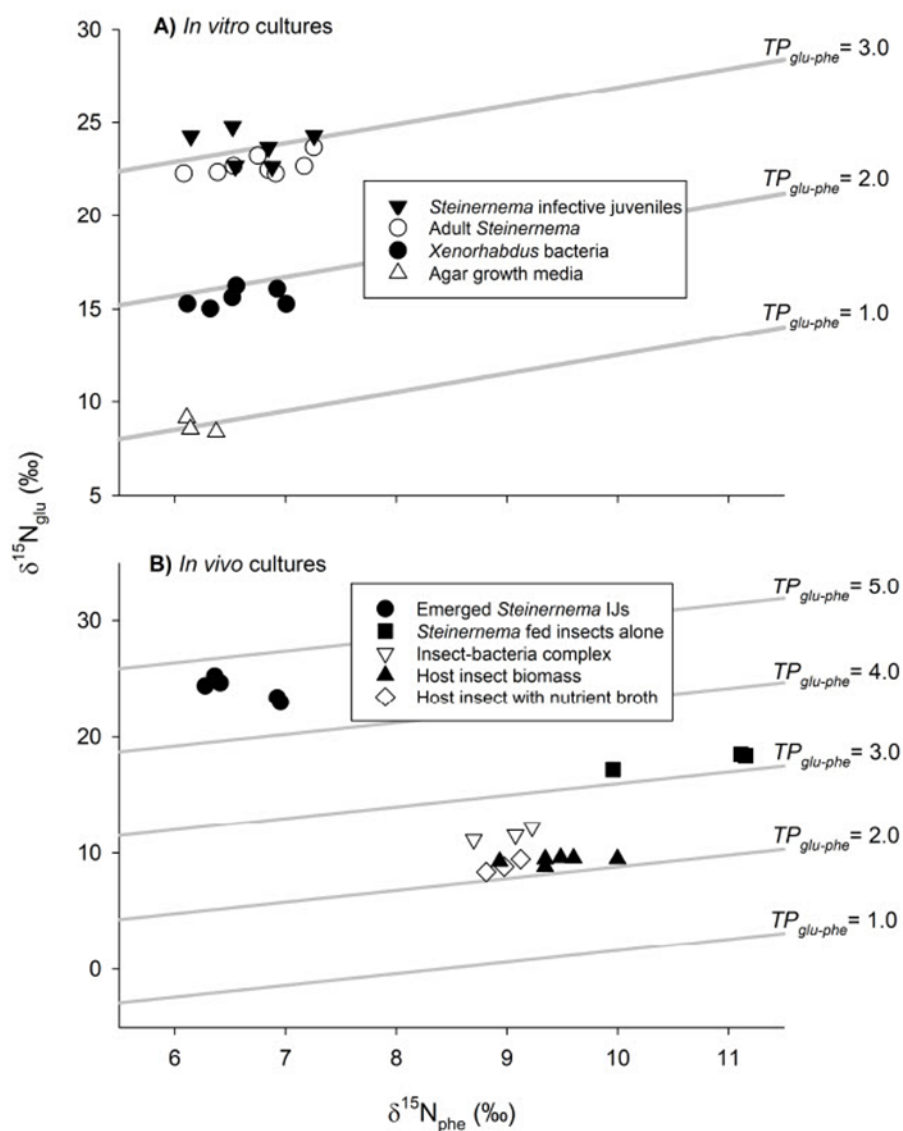

799  
800  
801  
802  
803  
804  
805

**Figure 1: Trophic analyses reveal *Steinernema* nematodes feed on *Xenorhabdus* bacteria (A) *In vitro* and (B) *In vivo*.** Trophic isoclines are represented via numeric  $TP_{glu-phe}$  % ratios. Specific bacterial cultures or animals are displayed as the different shapes shown in the figure legends.

**Table 1. Summary of *in vitro* and *in vivo* trophic measurements.**

| Consumer <sup>a</sup>                                                         | Diet type <sup>b</sup>                             | TDF <sub>glu-phe</sub> <sup>c</sup> | TP <sub>expected</sub> <sup>c</sup> | TP <sub>glu-phe</sub> <sup>c</sup> |
|-------------------------------------------------------------------------------|----------------------------------------------------|-------------------------------------|-------------------------------------|------------------------------------|
| <i>in vitro</i> growth conditions                                             |                                                    |                                     |                                     |                                    |
| None                                                                          | Yeast-soy lipid agar (YE-YS)                       | NA                                  | 1.0                                 | 1.0                                |
| <i>Xenorhabdus</i>                                                            | Yeast-soy broth (YE-YS)                            | 6.53                                | 2.0                                 | 1.9                                |
| <i>Steinernema</i> (adults)                                                   | <i>Xenorhabdus</i> on yeast-soy lipid agar (YE-YS) | 6.96                                | 3.0                                 | 2.9                                |
| <i>Steinernema</i> (IJs)                                                      | <i>Xenorhabdus</i> on yeast-soy lipid agar (YE-YS) | 8.02                                | 3.0                                 | 3.0                                |
| <i>in vivo</i> growth conditions                                              |                                                    |                                     |                                     |                                    |
| None                                                                          | <i>Galleria</i> (base of food-chain)               | NA                                  | 2.0                                 | 2.2                                |
| None                                                                          | <i>Galleria</i> + PBS buffer (positive control)    | NA                                  | 2.0                                 | 2.2                                |
| None                                                                          | Yeast-soy broth (YE-YS)                            | NA                                  | 2.0                                 | 2.2                                |
| <i>Xenorhabdus</i> (measured as <i>Galleria</i> - <i>Xenorhabdus</i> complex) | <i>Galleria</i>                                    | NA                                  | 2.5                                 | 2.5                                |
| <i>Steinernema</i> IJs                                                        | <i>Galleria</i> - <i>Xenorhabdus</i> complex       | NA                                  | 3.5                                 | 4.6                                |



306           \*Each organism in the ecosystem was assessed for its trophic position as a consumer under controlled *in vitro* conditions or *in vivo*  
307 within an insect cadaver. None indicates that the condition tested was diet only, no consumer.

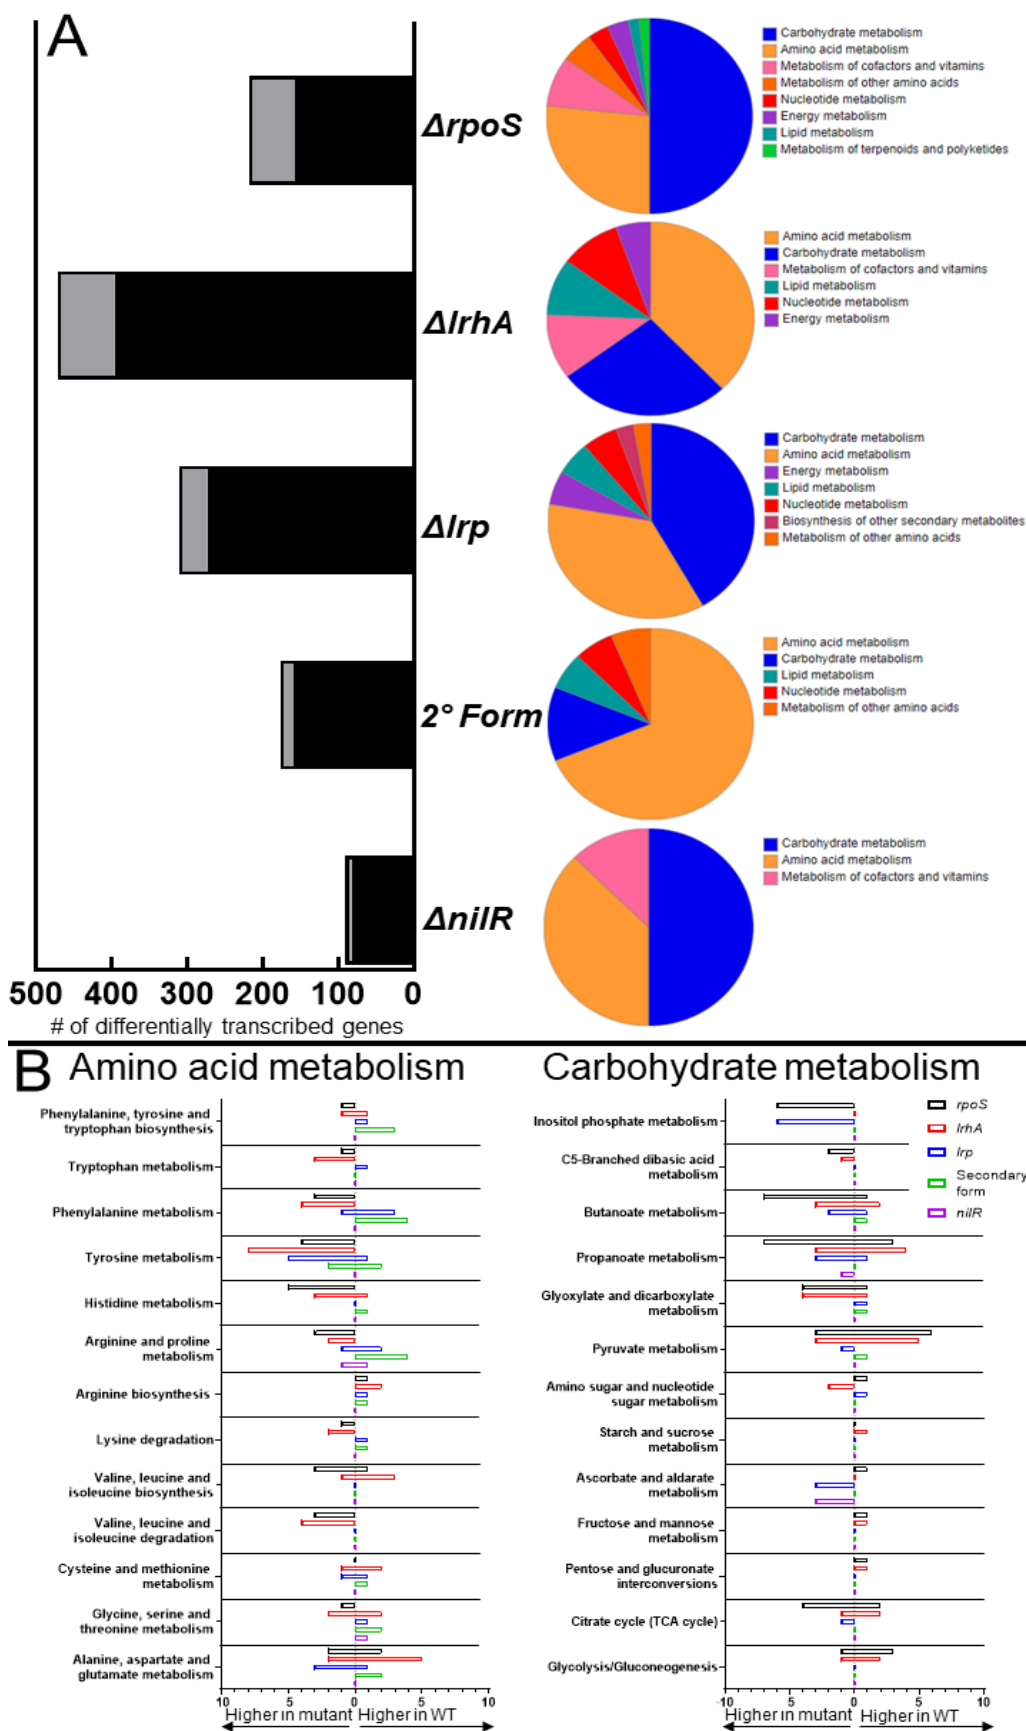

308  
309 **Figure 2: Differentially expressed transcripts between *X. nematophila* mutants and their broad functional**  
310 **categorization.** A) Quantification of the number of differentially regulated transcripts and how many are considered  
311 metabolic (light grey), as determined by KEGG annotation. [Signal fold change] > 2 was used as a cutoff for  
312 significance. BlastKOALA functional categorization of the differential metabolic transcripts are adjacent. The color

313 legend is organized by having the most common category listed first. B) Breakdown of the specific amino acid and  
 314 carbohydrate metabolism pathways that were affected by the mutations, compared among each strain, with # of genes  
 315 listed. Positive genes represent transcripts higher in the mutant relative to WT, negative genes represent transcripts  
 316 lower in the mutant relative to WT.  
 317  
 318

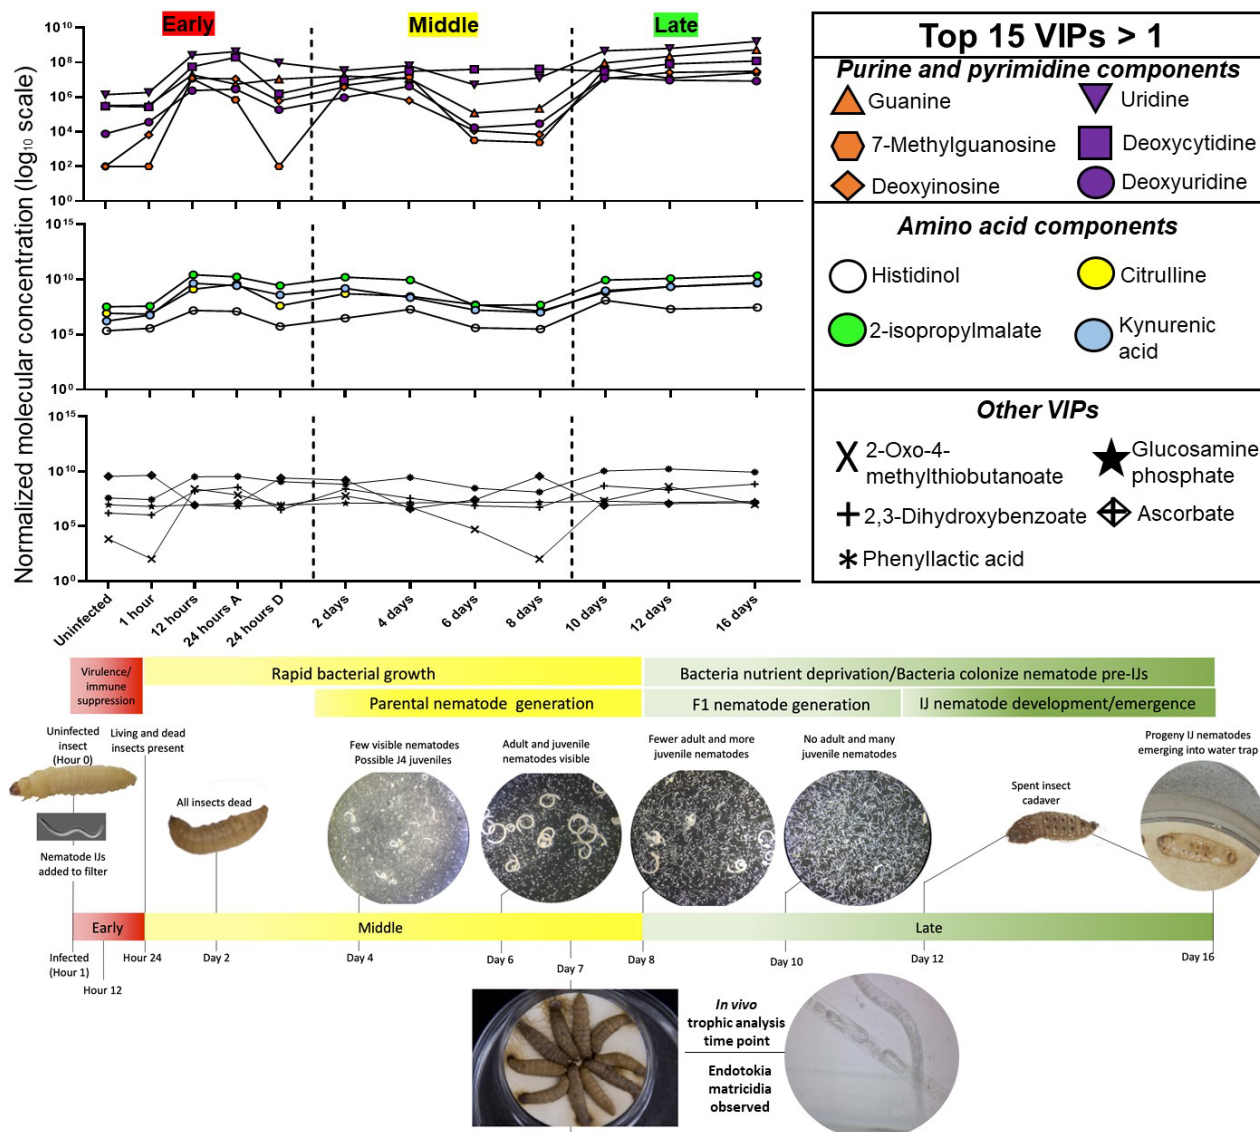

319  
 320 **Figure 3: Key moments in the EPNB lifecycle mapped onto important molecules are indicative of the**  
 321 **bioconversion of the insect cadaver.** The top 15 VIPs>1 metabolites averaged relative abundances were grouped  
 322 together into 3 categories: purine and pyrimidine components, amino acid components, and other important  
 323 molecules. Relative metabolite abundance in log scale is displayed on the y-axis of the line graphs.

324

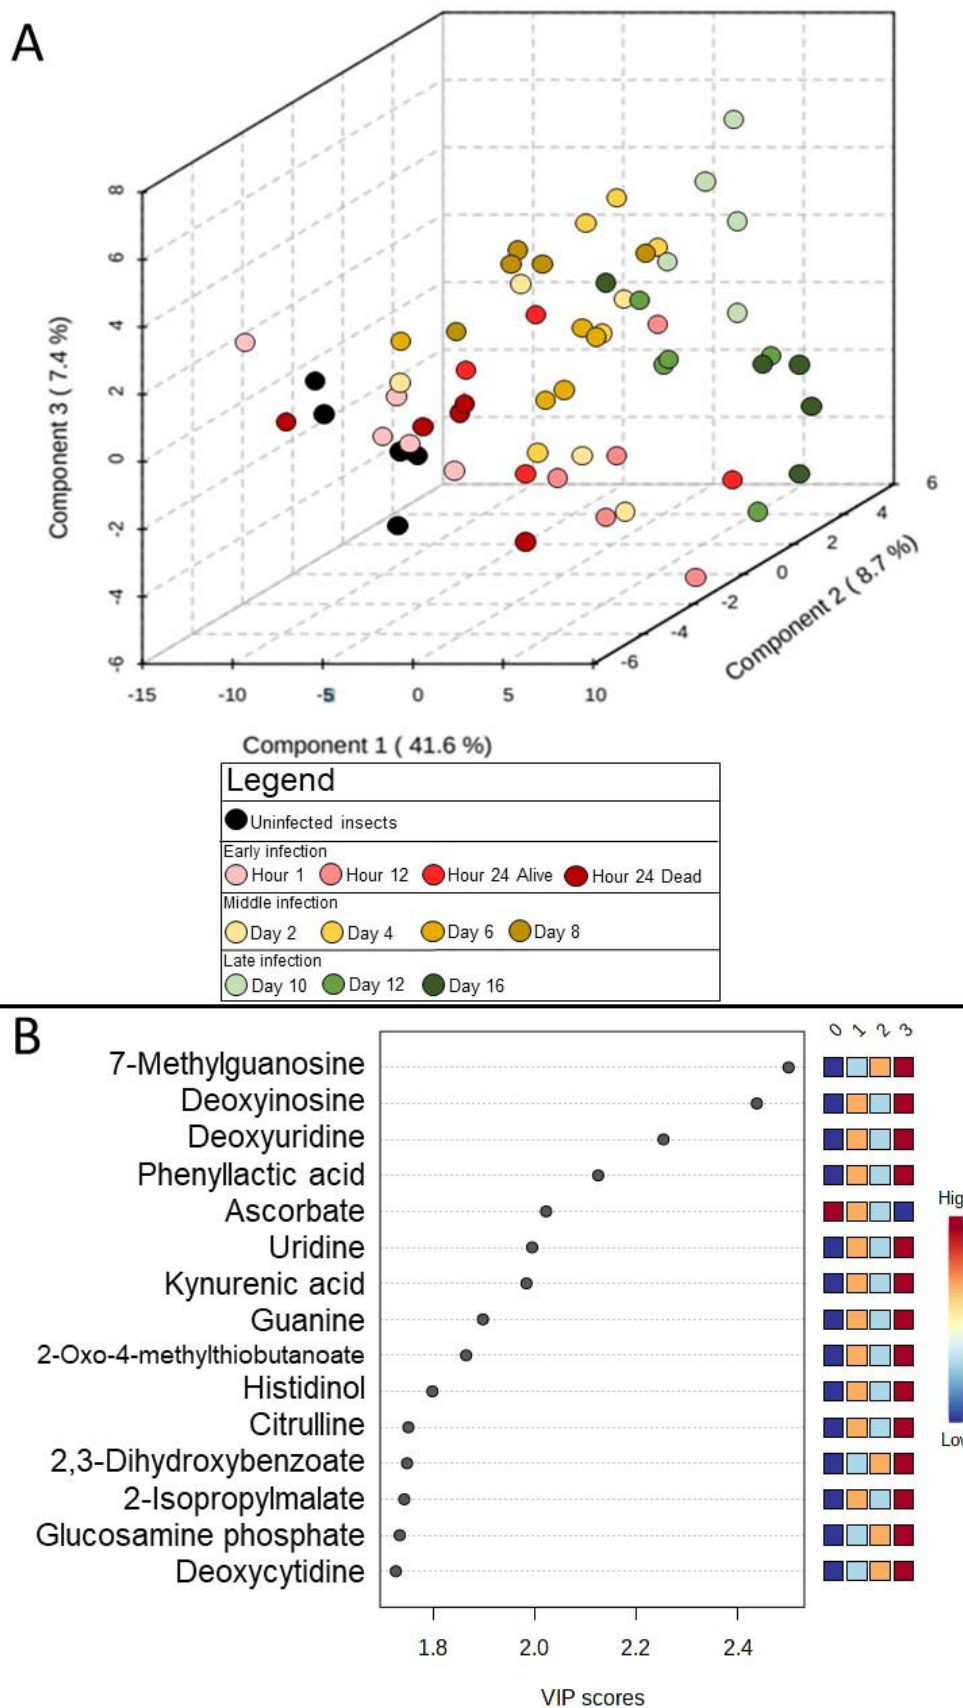

325  
326  
327  
328  
329

**Figure 4: Distinct chemical environments occur during bioconversion of an insect cadaver by *S. carpocapsae* and *X. nematophila*.** A) Three-dimensional partial least squares-discriminant analysis (PLS-DA) of time course infection metabolic profiles grouped according to stage of infection: uninfected (black) and early (red gradient), middle (yellow gradient), and late infected insects (green gradient). Components contributing to the separation of the

330 profiles are listed (in %) on the axes. B) The top 15 VIPs contributing to component 1 are listed, where the relative  
331 abundance shifts over the time course shown in a heatmap on the right. The numbers on top of the heatmap show the  
332 time phases: 0 (uninfected), 1 (early), 2 (middle), and 3 (late).

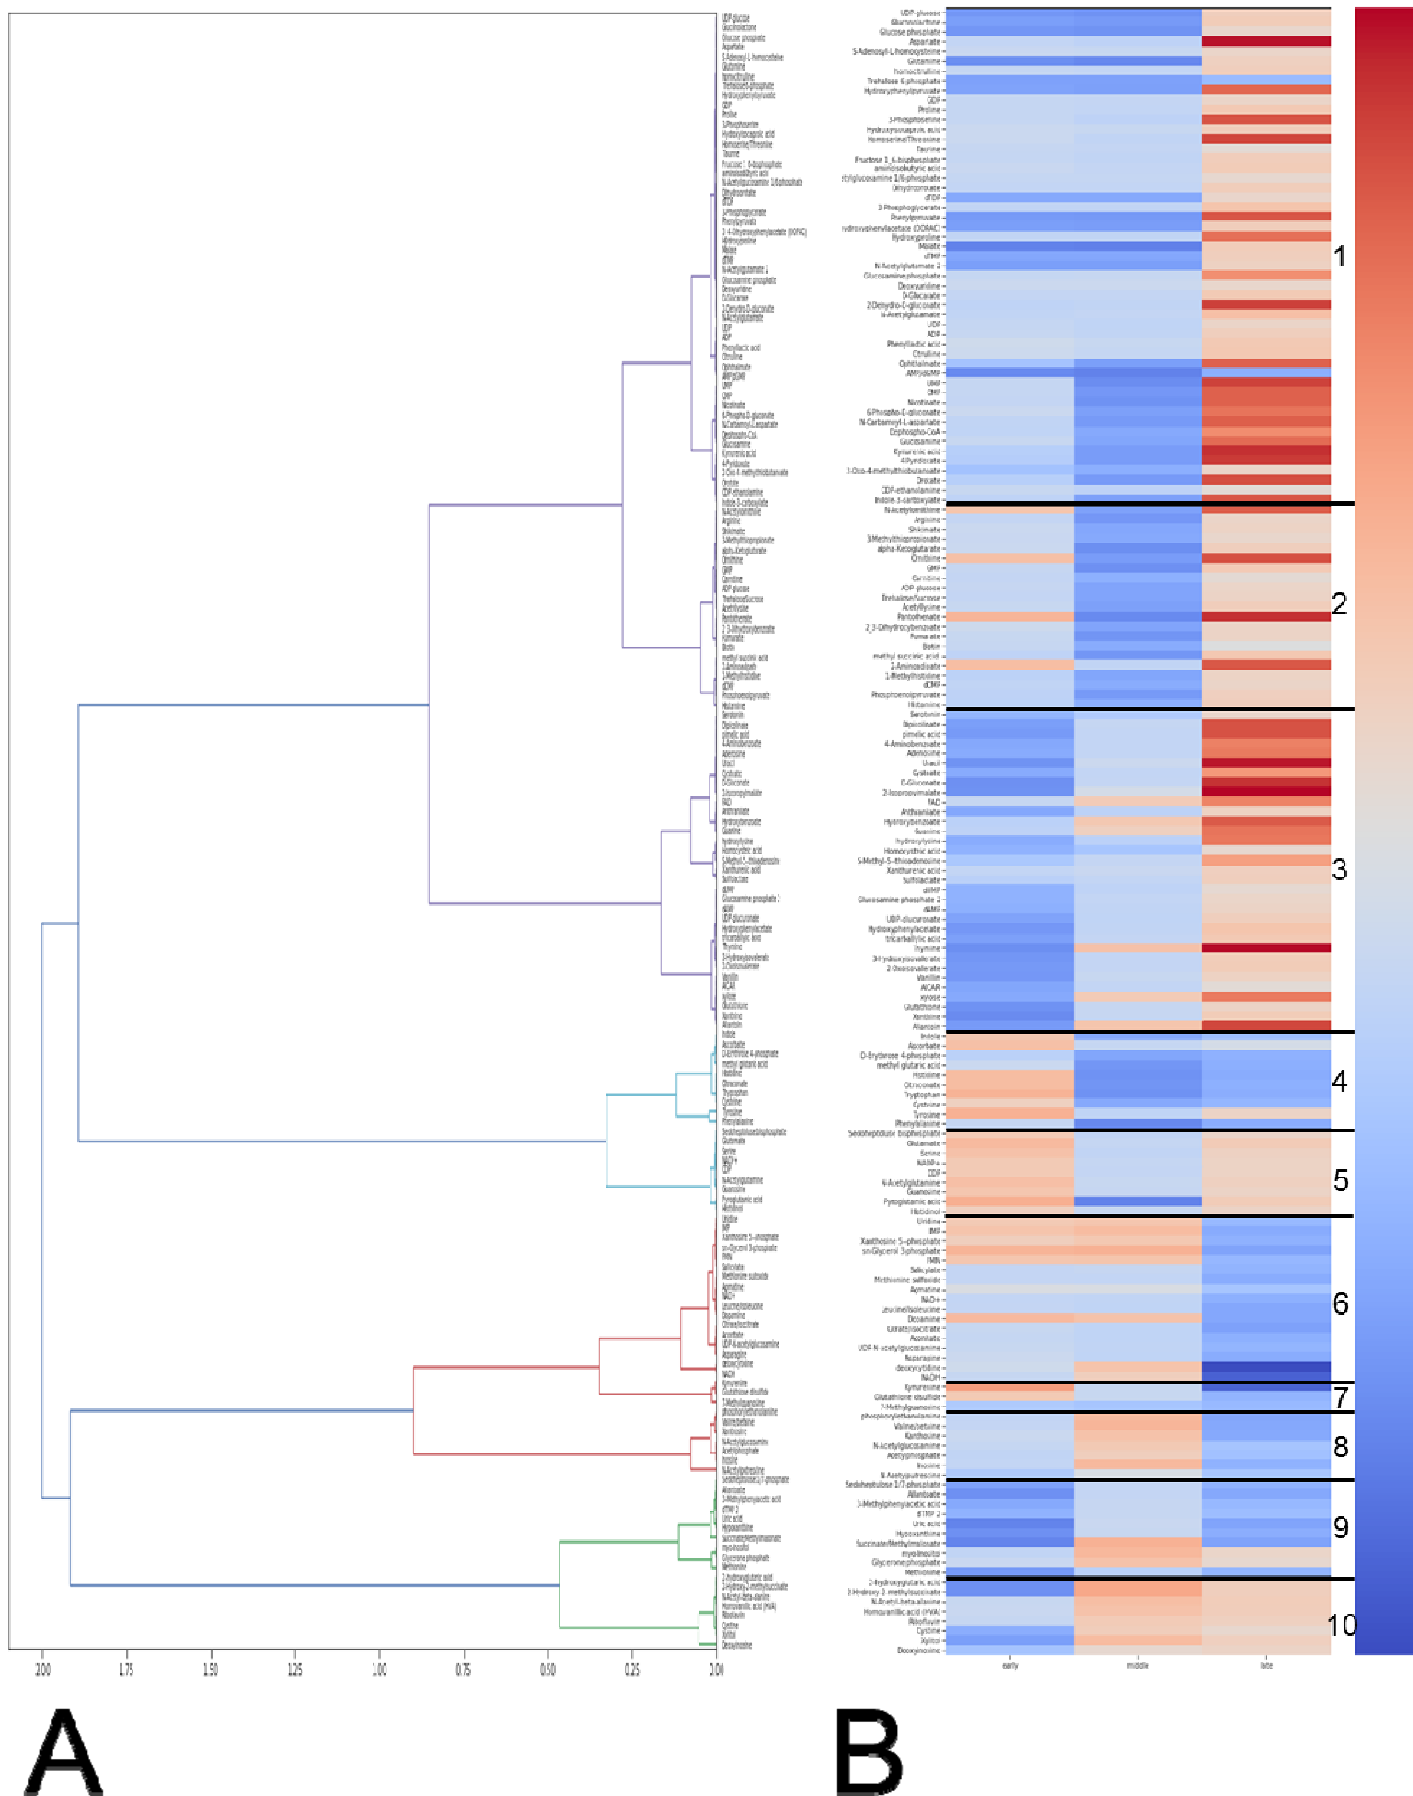

334 **Figure 5: Hierarchical clustering analysis of detected metabolites found ten metabolite cluster exhibit similar**  
 335 **rates of change over the infection.** A) Dendrogram corresponding to spearman correlation values for each  
 336 metabolite. B) Identified metabolite clusters with similar log(rate of change) over the lifecycle for the time phase,  
 337 compared to the previous time phase. Metabolites with a red box exhibit an increased molecular rate of change and  
 338 metabolites with a blue box exhibit a decreased molecular rate of change.

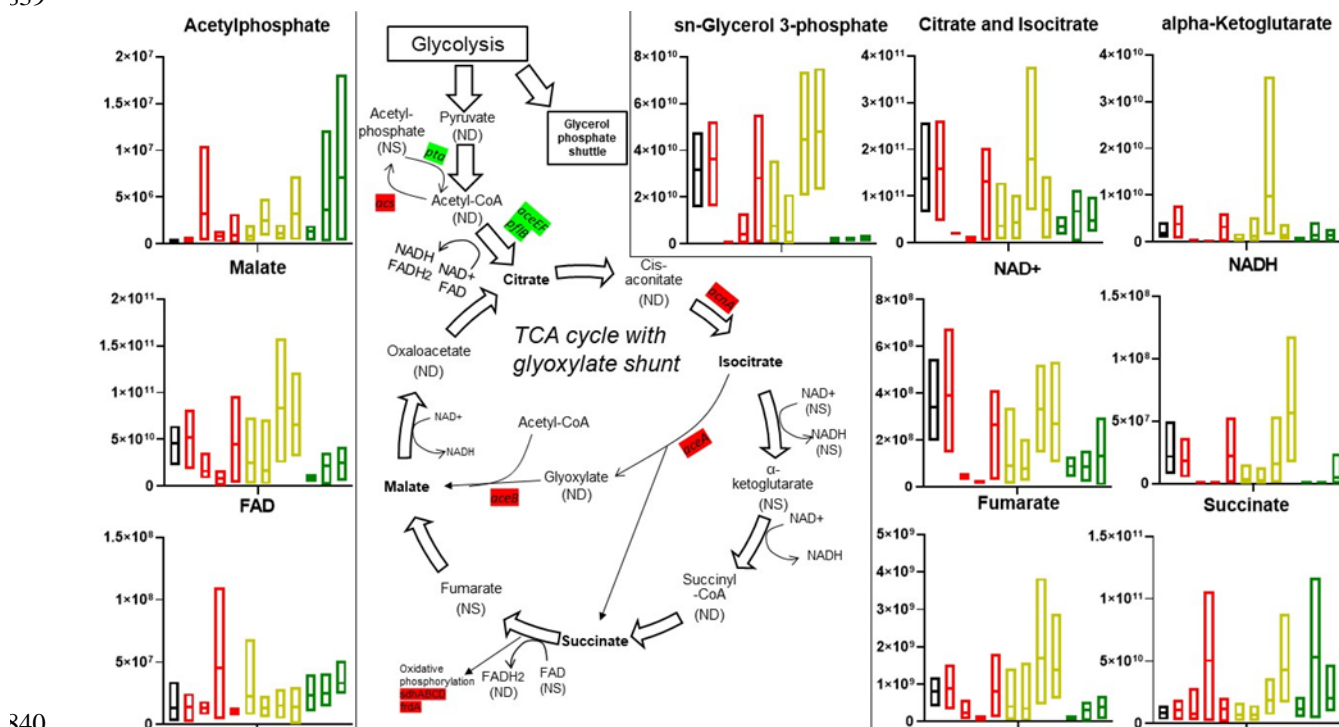

340 **Figure 6: Infection with *S. carpocapsae* IJs affects insect TCA cycle.** Normalized molecular concentration box  
 341 plots throughout the lifecycle are shown for all detected metabolites involved in the TCA cycle. Box plot colors  
 342 represent which time phase the individual plots belong to for: uninfected (black), early infection (red, going from  
 343 earliest, 1hr, to latest, 24 hours dead, time points), middle infection (yellow, days 2-8), and late infection (green, days  
 344 10-16). Lines in the middle of the boxes indicate the mean molecular concentration. Bolded metabolites indicate  
 345 significant concentration shifts during the life cycle, as determined by two-way ANOVA ( $P < 0.05$ ). NS indicates  
 346 detection, but not significantly affected (through the ANOVA) throughout infection. ND indicates not detectable.  
 347 Highlighted genes were detected as significant for the microarray in the  $\Delta I_rhA$  and  $\Delta rpoS$  strains. Green indicates  
 348 positive regulation, red indicates negative regulation.
